1  
2  
3  
4  
5  
6  
7  
8  
9  
10  
11  
12  
13  
14  
15  
16  
17  
18  
19  
20  
21  
22  
23  
24  
25  
26

## Activation of the Unfolded Protein Response and Inhibition of Translation Initiation during Coronavirus Infection

Nerea Irigoyen<sup>1\*</sup>, Krzysztof Franaszek<sup>1</sup>, Adam M. Dinan<sup>1,3</sup>, Nathan A. Moore<sup>2,4</sup>, Stuart G. Siddell<sup>1</sup>,  
Ian Brierley<sup>1</sup>, Andrew E. Firth<sup>1</sup>

<sup>1</sup>Division of Virology, Department of Pathology, University of Cambridge, Tennis Court Road,  
Cambridge CB2 1QP, United Kingdom,

<sup>2</sup>Department of Cellular and Molecular Medicine, University of Bristol, Bristol BS8 1TD, United  
Kingdom

<sup>3</sup>Current address: Fios Genomics, Edinburgh BioQuarter, EH16 4UX, United Kingdom

<sup>4</sup>Current address: Basingstoke and North Hampshire Hospital, Hampshire Hospitals, NHS  
Foundation Trust

Running Title: Host translational responses to coronavirus infection

\*Corresponding author: ni236@cam.ac.uk

**Keywords:** murine coronavirus, ribosome profiling, RNASeq, unfolded protein response,  
translation, protein synthesis

26 **Abstract:**

27 Coronaviruses (CoV), such as severe acute respiratory syndrome coronavirus (SARS-CoV) and  
28 Middle East respiratory syndrome coronavirus (MERS-CoV), are of medical importance with high  
29 mortality rates and significant zoonotic and pandemic potential. Here, we apply ribosome profiling  
30 and parallel RNASeq to globally analyse changes in the host cell translome and transcriptome  
31 upon infection with mouse hepatitis virus, strain A59 (MHV-A59), a model murine coronavirus in  
32 the same genus as SARS-CoV and MERS-CoV. We observed translational upregulation of ATF4,  
33 ATF5 and Ddit3 and activation of the unfolded protein response (UPR). Phosphorylation of eIF2 $\alpha$   
34 led to the global inhibition of translation and a substantial increase in empty 80S ribosomes. A drug  
35 that inhibits the UPR attenuates virus growth suggesting that MHV may have evolved to subvert the  
36 UPR to its own advantage. We also investigated an artefact of cycloheximide pretreatment in  
37 ribosome profiling whereby ribosomes accumulate at the 5' end of coding sequences in stressed  
38 cells but not in unstressed or untreated cells, thus extending earlier studies in yeast to mammalian  
39 cells. The study sheds light on the mechanisms of CoV translational shutoff and reveals a potential  
40 new therapeutic strategy.

41

42 **Importance:**

43 Ribosome profiling is an emerging technique that reveals a global snap shot of protein synthesis by  
44 precisely mapping the positions of translating ribosomes. It has particular applicability to virology  
45 where it allows not only monitoring of viral gene expression, but also host response at the level of  
46 individual genes and globally. In this work, we use ribosome profiling and parallel transcriptome  
47 sequencing (RNASeq) to monitor changes in transcription and translation in cells infected with the  
48 model coronavirus, murine coronavirus strain MHV-A59, a virus in the same genus as the  
49 medically important SARS-CoV and MERS-CoV. The sensitivity and precision of the approach  
50 permit us to obtain a high-resolution analysis of different biological processes – such as the  
51 activation of the unfolded protein response. At late time points of infection, translation is inhibited  
52 globally and, surprisingly, viral transcripts are not resistant to this effect. Nonetheless, relief of  
53 translational inhibition with a drug that interferes with the unfolded protein response is detrimental

54 to virus replication. This study sheds new light on the complex interactions between virus and host  
55 during infection and provides new potential targets for antiviral intervention.

56

## 57 **Introduction:**

58

59 The *Coronaviridae* are a family of enveloped viruses with positive-sense, monopartite, single-  
60 stranded RNA genomes. At 27–32 kb, coronaviruses (CoVs) have the largest known RNA  
61 genomes. CoVs cause a broad range of diseases in animals and humans, ranging from the common  
62 cold to severe acute respiratory syndrome (SARS) [1]. Amongst CoVs of medical importance with  
63 high mortality rates and pandemic potential are SARS-CoV and MERS-CoV, both members of the  
64 genus *Betacoronavirus*. Murine coronavirus, a betacoronavirus more commonly referred to as mouse  
65 hepatitis virus (MHV), has been used as a model to study the replication and biology of other  
66 members of the genus.

67

68 Virus infection alters cellular gene expression to facilitate replication of the viral genome and the  
69 assembly of virus particles. As with all viruses, CoVs rely on the host cell translational machinery  
70 for viral protein synthesis. Many viruses have evolved mechanisms to shut-off host mRNA  
71 translation, which can increase the availability of the translational machinery for non-canonical  
72 modes of viral protein synthesis, and at the same time inhibit host antiviral responses [2]. Exactly  
73 how CoVs induce host translational shut-off and its significance in relation to the synthesis of virus  
74 proteins, particularly at later times of infection, is still poorly understood. During CoV replication,  
75 the massive production and modification of viral proteins, as well as virion budding-related  
76 endoplasmic reticulum (ER) membrane depletion, can lead to overloading of the folding capacity of  
77 the ER and, consequently, ER stress [3]. This activates the unfolded protein response (UPR) which  
78 returns the cell to homeostasis and mitigates the major risk that protein misfolding poses for correct  
79 cellular function [4]. In mammalian cells, the UPR is controlled by three ER-resident  
80 transmembrane sensors: the inositol-requiring enzyme-1 (IRE1), the PKR-like ER kinase (PERK),  
81 and the activating transcription factor-6 (ATF6). These sensors recognize unfolded/misfolded  
82 proteins inside the ER and transmit a signal to the nucleus to transcribe specific genes whose  
83 products act to lower protein synthesis and increase ER folding capacity [4]. Previous studies

84 (reviewed in [5]) have aimed to establish how the different UPR pathways are involved during CoV  
85 infection. Ribosome profiling (RiboSeq) allows global monitoring of cellular translation by mapping  
86 the positions of translating ribosomes on the transcriptome [6-8]. RiboSeq reveals the location and  
87 abundance of ribosomes on specific mRNA species with single-nucleotide precision. In conjunction  
88 with RNASeq, to determine the corresponding transcriptome, RiboSeq has been used to elucidate  
89 changes in translation, transcription and translation efficiency in viral and host gene expression  
90 during the course of infection [9-19].

91

92 Here, we use RiboSeq and parallel RNASeq to globally analyse changes in the host translome and  
93 transcriptome throughout a time course of CoV infection. We observe activation of different  
94 pathways of the UPR leading to eIF2 $\alpha$  phosphorylation and translational shut-off at the level of  
95 initiation which we confirm by polysome profiling. Surprisingly, however, a pharmacological  
96 inhibitor of the UPR was found to attenuate virus replication. We also investigate a remarkable  
97 perturbation in ribosome footprint distributions on coding sequences previously observed at late  
98 time points of infection and determine that it is a methodological artefact arising from the use of the  
99 elongation inhibitor cycloheximide. This detailed analysis of cellular translation during MHV  
100 infection provides new insights into the mechanism of CoV translational shutoff and the complex  
101 interactions between virus and host during infection, and may aid the identification of new targets  
102 for antiviral intervention.

103

104

## 105 **Results:**

106

### 107 **Effects of MHV-A59 infection on cellular gene expression**

108 To survey genome-wide changes in host translation and transcription during CoV-infection, we  
109 interrogated sequencing data generated previously in this laboratory [16]. In these experiments, we  
110 generated RNASeq and RiboSeq data from two independent biological repeats of murine 17 clone 1

111 cells (17 Cl-1) infected with recombinant MHV-A59 at a multiplicity of infection (MOI) of 10, and  
112 harvested at 1, 2.5, 5 and 8 h post-infection (p.i.), with mock-infected cells harvested at 1 and 8 h.

113

114 To assess the effects of MHV infection on cellular transcript abundance, differential expression  
115 analyses were performed with DESeq [20], EdgeR [21], NOISeq [22] and BaySeq ([23]). The  
116 different analyses had a large number of overlapping predictions (Fig 1A). The volcano plot (Fig  
117 1B) derived from BaySeq analysis of four uninfected (1 and 8 h) and two infected (5 h p.i.)  
118 RNASeq libraries revealed that some of the most differentially expressed cellular transcripts (red  
119 points) are related to the host translational apparatus (*Eef1a1* – eukaryotic elongation factor 1A-1;  
120 *Eif3f* – eukaryotic initiation factor 3 subunit F; *Eif1* – eukaryotic initiation factor 1; *Eif2s3x* –  
121 eukaryotic initiation factor 2 subunit 3 gamma, and *Eif2b3* – eukaryotic initiation factor 2B GDP-  
122 GTP exchange factor subunit gamma), the UPR (*Herpud1* – homocysteine inducible ER protein  
123 with ubiquitin like domain 1 and *Chac1* – glutathione-specific gamma-glutamylcyclotransferase 1),  
124 and the gene coding for the largest subunit of RNA polymerase II, *Polr2a*.

125

126 To further validate changes in the transcript abundance of these genes, total RNA was extracted  
127 from three biological replicates of MHV-infected and mock-infected cells at 5 h p.i. and the levels  
128 of selected up-regulated (Fig 1C, left panel) and down-regulated (Fig 1C, middle panel) transcripts  
129 assessed by quantitative real-time PCR (qRT-PCR), normalized by a ‘housekeeping gene’,  
130 ribosomal protein L19 (RPL19), which has been reported to be unaffected by ER stress [24,25].  
131 qRT-PCR was also used to assess the abundance of viral nucleocapsid (N) transcripts (Fig 1C, right  
132 panel). Up-regulated transcripts had qRT-PCR values broadly consistent with the RNASeq  
133 measurements (Fig 1B and 1C) whereas down-regulated transcripts did not, with the exception of  
134 *Eef1a*. However, the *Rpl19* transcript was, in fact, moderately down-regulated at 5 h p.i. (relative to  
135 the global transcriptome mean) (Fig 1B, yellow), which may account for these discrepancies. A  
136 comparison of differential expression between the 1 and 8 h mocks showed much smaller

137 differences, with only four transcripts having changes with a false discovery rate (FDR)  $\leq$  0.05  
138 (S1A Fig).

139

140 CoVs induce host translational shut-off [26-31] though the mechanisms have not been well-defined.  
141 We reasoned that some host genes may be resistant to virus-induced shut-off and that identifying  
142 such genes might give new insights into the shut-off mechanism(s). To evaluate differences at the  
143 level of translation as a result of MHV infection, we calculated relative translation efficiencies (TE)  
144 – defined herein as the ratio of ribosome-protected-fragment (RPF) and total RNA density in the  
145 coding region (CDS) of a given gene – at 5 and 8 h p.i. TE was estimated using Bayseq in the  
146 paired library mode, Babel [32] and Xtail [33]. These analyses had few overlapping predictions of  
147 genes significantly differentially expressed, with Xtail producing a much higher number of  
148 predictions (Fig 2). These differences are likely due to variations in model assumptions between the  
149 different approaches and reflect the greater difficulty inherent in modeling a quotient distribution  
150 (i.e. RiboSeq/RNASeq). To proceed, we focused on genes that showed more than a 2-fold  
151 difference in mean TE between infected and mock samples, and a FDR  $\leq$  0.05 (upper right and  
152 upper left quadrants; Fig 2B – Babel 5 h p.i.; Fig 2C – Xtail 5 h p.i. and Xtail 8 h p.i.). Translational  
153 differences between 1 and 8 h mock-infected cells are shown in S1B Fig.

154

155 Among the mRNAs found to be preferentially translated during MHV-infection were those whose  
156 translation is known to be induced by eIF2 $\alpha$  phosphorylation, including those for transcription  
157 factors ATF4 (activating transcription factor 4), ATF5 (activating transcription factor 5) and CHOP  
158 (DDIT3/GADD153) (Fig 2B and 2C; S2A Fig). The mRNAs encoding these proteins contain  
159 (multiple) inhibitory upstream open reading frames (uORFs) in their 5' leaders and undergo  
160 selective re-initiation of the main ORF under conditions of eIF2 $\alpha$  phosphorylation [34-39]. Another  
161 gene previously shown to be resistant to eIF2 $\alpha$  phosphorylation-induced translational attenuation is  
162 Slc35a4 (Solute Carrier Family 35, Member A4; Fig 2B; [39]). In our study, the vast majority of

163 RPFs derived from this mRNA mapped to the 102-codon uORF (S2B Fig). These results are  
164 consistent with eIF2 $\alpha$  phosphorylation (leading to inhibited initiation) being a major cause of host  
165 translational shut-off during MHV infection.

166

167 **An artefact of cycloheximide treatment explains a remarkable perturbation in the**  
168 **distribution of elongating ribosomes**

169 Previous meta-analyses of RPFs mapping to host mRNAs in MHV-infected cells indicated a  
170 remarkable perturbation in host cell translation at late time points [16] with a greatly increased  
171 proportion of reads mapping to the first ~30–40 codons of CDSs in MHV-infected cells at 5 and 8 h  
172 p.i. (e.g. Fig 3A compares 8 h p.i. with 8 h mock; data from [16]). Other ribosome profiling studies  
173 have revealed a similar accumulation of ribosomes in the 5' portion of CDSs after heat shock,  
174 proteotoxic and oxidative stress, and attributed this to an early post-initiation inhibition of  
175 elongation under cell stress [40-42]. More recently, these results have been called into question by  
176 the discovery that cycloheximide pre-treatment in yeast leads to an accumulation of ribosomes in  
177 the 5' portion of CDSs specifically in stressed cells [43,44]. Moreover, this accumulation was not  
178 seen if the yeast cells were flash frozen without cycloheximide pre-treatment, or if very high  
179 concentrations of cycloheximide were used.

180

181 In order to determine whether this experimental caveat might extend to stressed mammalian cells  
182 and perhaps explain the observed accumulation of ribosomes downstream of initiation sites during  
183 virus infection [16], 17 Cl-1 cells were infected with MHV A-59 at MOI of 10 and at 8 h p.i.  
184 harvested either by flash freezing in the absence of cycloheximide, or following supplementation of  
185 the growth medium with 100  $\mu$ g/ml cycloheximide (CHX 1X) or 10 mg/ml cycloheximide (CHX  
186 100X) for minutes prior to harvesting. A similar experiment was performed with 17 Cl-1 cells  
187 incubated with a pharmacological inducer of ER stress, tunicamycin, for 6 h which activates all

188 UPR signalling pathways. Ribosomal occupancy profiles and the effects of stress and drug  
189 treatment are shown in Fig 3B (for MHV-infected cells) and Fig 3C (for tunicamycin-treated cells).

190

191 A modest increase in ribosome occupancy downstream of initiation sites occurred in tunicamycin-  
192 stressed cells under normal cycloheximide treatment (compare “tunicamycin CHX 1X” with “mock  
193 CHX 1X” plots; Fig 3C). Similar to findings in stressed yeast cells [43], this could be alleviated by  
194 high concentrations of cycloheximide or flash freezing without cycloheximide pre-treatment (Fig  
195 3C, CHX 100X and “flash frozen” plots). In virus-infected cells, however, a much more  
196 pronounced accumulation of ribosomes was observed downstream of initiation sites under  
197 cycloheximide treatment, and this was not alleviated even when cycloheximide was used at 100-  
198 fold the normal concentration (Fig 3B, CHX 1X and 100X plots). However, this ribosome peak  
199 completely disappeared when cells were flash frozen without cycloheximide pre-treatment (Fig 3B,  
200 “flash frozen” plots). Thus we conclude that the cycloheximide-induced accumulation of ribosomes  
201 in the 5' region of CDSs also occurs in stressed mammalian cells and, further, that this effect is not  
202 necessarily negated simply by increasing the cycloheximide concentration.

203

204 As in previous studies [41,42], we quantified excess 5' ribosome density for individual transcripts  
205 by means of a 5' loading ratio statistic where we compared the density of RPFs in the 5'  
206 approximately 30 codons of each CDS to the density of RPFs in the 3' remainder of the CDS. As  
207 expected, when harvested at 8 h in the presence of cycloheximide the 5' loading ratios of  
208 cytoplasmic mRNAs showed a substantial increase in MHV-infected cells compared to mock-  
209 infected cells (Fig 4, left panel), whereas there was no such effect when cells were harvested with  
210 flash freezing (Fig 4, right panel). Interestingly, but not unexpectedly, this effect was not seen for  
211 mitochondrial mRNAs, which had similar 5' loading ratio statistics over all conditions (Fig 4, red  
212 crosses).



213 In view of the cycloheximide effect, data from the flash frozen 8 hpi mock and MHV-infected  
214 samples were used for the individual gene plots shown in the following sections.

215

### 216 **MHV infection and activation of the unfolded protein response**

217 Although several studies [29, 45-47] have aimed to establish how each of the three UPR sensor-  
218 pathways may be involved during CoV infection, we wanted to take advantage of the high-  
219 resolution that ribosome profiling can provide to analyse in detail each specific arm of the UPR  
220 response during MHV infection.

221

### 222 **Monitoring ATF6 and IRE1 $\alpha$ activity**

223 Upon induction of ER stress, ATF6 translocates from the ER to the Golgi apparatus where it is  
224 cleaved by the proteases Site-1 (S1P) and Site-2 (S2P) [48]. After cleavage, the amino-terminus of  
225 ATF6, containing a basic leucine zipper (bZIP) transactivating domain, translocates to the nucleus  
226 to upregulate the ER chaperone immunoglobulin heavy chain binding protein (BiP/Grp78), whose  
227 mRNA or protein levels serve as a proxy for activation of the ATF6 pathway [29,49] 17 Cl-1 cells  
228 were infected with MHV-A59 or incubated with tunicamycin. Cells were harvested at 2.5, 5, 8 and  
229 10 h p.i. and analyzed by qRT-PCR (Fig 5A). An induction of *BiP/Grp78* transcription was  
230 observed in tunicamycin-treated (purple) and MHV-infected cells (orange) from 2.5 to 8 h p.i.  
231 followed by a modest decline, whereas mock-infected cells (blue) showed no induction.  
232 Surprisingly, whereas Western blot analysis (Fig 5B) confirmed induction of BiP/Grp78 protein in  
233 tunicamycin-treated cells by 8 h p.i., no such induction was seen in MHV-infected cells.

234

235 At 8 h p.i., MHV-infected cells were harvested by flash freezing in the absence of cycloheximide.  
236 As a positive control for UPR activation, cells treated with tunicamycin for 6 h were also harvested  
237 by flash freezing. RNASeq and RiboSeq read counts of *BiP/Grp78* (Mock 8 h and MHV 8 h p.i.;  
238 Fig 5C) revealed an increase in RNASeq reads in MHV-infected cells (Mock RNA and Inf RNA

239 panels) consistent with the qRT-PCR results. Although an expected increase in RPFs was seen (Inf  
240 Ribo panel), ribosome density was not as high in MHV-infected cells as in tunicamycin treated cells  
241 (Fig 5C, Tunica Ribo panel). A lower ribosome density in the *BiP/Grp78* ORF for MHV-infected  
242 cells likely explains why this protein was not immunodetected at later times of infection.

243

244 ER stress induction activates endonuclease IRE1 $\alpha$  which cleaves X-box binding protein-1 (*Xbp-1*)  
245 mRNA [50,51]. Activated IRE1 $\alpha$  removes a 26-nt intron from unspliced *Xbp-1* (*Xbp-1u*) mRNA  
246 leading to a translational reading frame shift and a longer protein. The product of spliced *Xbp-1*  
247 mRNA (*XBP-1s*) is an active transcription factor that upregulates the expression of ER-associated  
248 degradation (ERAD) components and ER chaperones. Determination of *Xbp-1* splicing was done by  
249 reverse transcriptase PCR (RT-PCR) of total RNA extracted from 17 Cl-1 cells infected with MHV-  
250 A59 or incubated with tunicamycin, using specific primers flanking the *Xbp-1* splice site (Fig 5D).  
251 At all timepoints, *Xbp-1u* was the predominant form in mock-infected cells whereas *Xbp-1s* was the  
252 major species in tunicamycin-treated cells. In virus-infected cells, *Xbp-1u* was predominant at 2.5 h  
253 p.i. but *Xbp-1s* became predominant at 5 h p.i. In order to analyse translation of *Xbp-1u* and *Xbp-1s*  
254 in virus-infected cells, we inspected the ribosome profiling data (Fig 5E). For 8 h p.i. MHV-infected  
255 cells (Inf Ribo panel) and tunicamycin-treated cells (Tunica Ribo), an increased number of reads  
256 mapped in the +2 reading frame (yellow peaks) of the *Xbp-1u* sequence, and downstream of the  
257 annotated stop codon. These reads result from translation of the *Xbp-1s* frameshifted isoform and  
258 indicate a dramatic increase in production of the active transcription factor.

259

### 260 **Monitoring PERK-eIF2 $\alpha$ -ATF4 activity**

261 In response to ER stress, PERK oligomerizes and auto-phosphorylates [52]. Activated PERK  
262 phosphorylates the  $\alpha$ -subunit of eukaryotic initiation factor 2 (eIF2 $\alpha$ ) which in turn impairs  
263 recycling of inactive eIF2-GDP to active eIF2-GTP resulting in a general shutdown of protein  
264 synthesis [53]. However, as previously described, translation of ATF4 is increased in this situation

265 [34,35,54] leading to the induction of its target gene *Chop*. To monitor activation of this pathway,  
266 we analysed CHOP, ATF4 and p-eIF2 $\alpha$  expression by qRT-PCR and Western blotting. 17 Cl-1 cells  
267 were infected with MHV-A59 or incubated with tunicamycin for 2.5, 5, 8 and 10 h. As shown in  
268 Fig 6A, *Chop* mRNA levels (measured as the *Chop/RpL19* ratio) increased five-fold in  
269 tunicamycin-treated cells (purple) compared to mock-infected cells (blue), and were stable over the  
270 time course. In MHV-infected cells (orange), the ratio also increased from 2.5 to 8 h p.i. although  
271 not to the level seen in tunicamycin-treated cells. Protein expression was determined by  
272 immunoblotting using antibodies specific for ATF4, p-eIF2 $\alpha$  and N proteins with GAPDH and  
273 eIF2 $\alpha$  as loading controls (Fig 6B). ATF4 and p-eIF2 $\alpha$  were detected at all time points in  
274 tunicamycin-treated cells and all of the proteins were detected in MHV-infected cells from 5 h p.i.  
275 onwards. Subsequently, we analysed profiles of the RiboSeq and RNASeq reads mapping to ATF4  
276 in the virus-infected and tunicamycin-treated cells (Fig 6C). Consistent with previous studies  
277 [34,35], translation of the short (three codon) uORF1 (frame +2, nucleotides 399 to 407) was  
278 observed under all conditions. In mock-infected cells, uORF2 was efficiently translated (Mock Ribo  
279 panel; reads in yellow mapping to uORF2 indicated by a yellow rectangle, frame +2) thus diverting  
280 scanning preinitiation ribosomes from accessing the main ORF (blue rectangle, frame 0, reads in  
281 purple) to which very few RPFs mapped. In contrast, in MHV-infected cells at 8 h p.i. (Inf Ribo  
282 panel), a substantial fraction of preinitiation ribosomes were able to scan past uORF2 to translate the  
283 main ORF, leading to a reduced density of ribosomes on uORF2 and a greatly increased number of  
284 RPFs mapping to the main ORF. Tunicamycin-treated cells showed an intermediate ribosome  
285 distribution, but again with efficient translation of the main ORF.

286

287 Fig 6D displays the RiboSeq and RNASeq profiles for *Chop*. Consistent with the qRT-PCR analysis  
288 (Fig 6A), RNASeq reads (Inf RNA panel) were increased at 5 h p.i. compared to mock and there  
289 was an increase in the number of RPFs mapping to the main ORF (blue rectangle, purple reads).  
290 This increase in translation of the main ORF was also accompanied by an increase in the number of

291 RPFs derived from ribosomes initiating on the *Chop* uORF (yellow rectangle, blue reads). This  
292 uORF occupancy was especially strong in tunicamycin-treated cells (Tunica Ribo panel).

293

### 294 **Polysome profiling of 17 Cl-1 cells infected with MHV-A59**

295 Since total read counts are normalized by library size, ribosome profiling does not provide  
296 information on total global translation levels. To further investigate virus-induced inhibition of  
297 translation as a consequence of UPR activation and eIF2 $\alpha$  phosphorylation, analytical polysome  
298 profiling (Fig 7A) was done for mock- and MHV-infected 17 Cl-1 cells. Cytoplasmic extracts were  
299 prepared in the presence of cycloheximide to retain intact monosomes and polysomes and analyzed  
300 by sucrose density gradient centrifugation. This revealed an accumulation of monosomes (80S) in  
301 MHV-infected cells from 5 h p.i. onwards, consistent with inhibition of initiation. To investigate  
302 whether the 80S ribosomes accumulating during MHV infection contain mRNA (as an indicator of  
303 a translating ribosome), polysome profiling was repeated using a higher salt buffer (400 mM KCl;  
304 Fig 7B), conditions in which 80S ribosomes lacking mRNA dissociate into constituent subunits. In  
305 mock-infected cells, a modest diminution of 80S levels was observed at 400 mM KCl (mock 5 h,  
306 compare Fig 7A panel 2, and Fig 7B left panel), but a much greater reduction in 80S was observed  
307 in MHV-infected cells (MHV 5 h p.i., compare Fig 7A panel 5 and Fig 7B right panel), indicating  
308 that the vast majority of 80S ribosomes accumulating at this time point are not mRNA-associated.  
309 These data indicate that MHV-infection leads to translational shut-off via inhibited initiation,  
310 consistent with the effects of eIF2 $\alpha$  phosphorylation.

311

### 312 **Effect of the PERK inhibitor GSK-260614 on MHV replication**

313 GSK-260614 is a potent and selective high affinity ligand of the PERK kinase that interferes with  
314 kinase activity by competing for ATP [55,56]. In MHV-infected 17 Cl-1 cells at 5 h.p.i., the drug  
315 prevented phosphorylation of the PERK substrate, eIF2 $\alpha$ , in a dose-dependent manner (Fig 8A),  
316 effectively blocking this branch of the UPR, with only a minor effect on cell viability (S4A Fig).

317 Pulse labelling of infected cells for one hour at 5 h.p.i. revealed, as expected, that prevention of  
318 eIF2 $\alpha$  phosphorylation increased modestly both viral (Fig 8A) and host protein synthesis (Fig 8B),  
319 without effect on mock-infected cells (Fig 8B).

320

321 Despite the increased virus protein synthesis, 17 Cl-1 cell monolayers infected with MHV-A59 in  
322 the presence of the PERK inhibitor remarkably showed delayed formation of syncytia in  
323 comparison to untreated cells at 8 h p.i. (Fig 8C), and quantification of released virions through  
324 TCID<sub>50</sub> assays revealed an ~four-fold reduction in virus titre in cells incubated with GSK-260614  
325 compared to control cells (P = 0.064; S4B Fig). These observations suggest that relieving inhibition  
326 of protein synthesis – affecting both cellular and viral proteins – is detrimental to virus production  
327 and the development of syncytia in virus infected cells.

328

## 329 **Discussion:**

330

331 We have used ribosome profiling and parallel RNASeq to investigate changes in the cellular  
332 translome and transcriptome in response to infection with MHV, a representative of the  
333 *Betacoronavirus* genus of the *Coronaviridae* family. These studies provide the highest resolution  
334 data to date on the translome of cells during coronavirus-induced stress.

335

336 RNASeq libraries revealed that some of the most significantly upregulated cellular transcripts in  
337 virus-infected cells were part of the UPR (*Herpud1* and *Chac1*) and changes in the translation  
338 efficiency of cellular proteins were consistent with uORF-regulated responses to eIF2 $\alpha$   
339 phosphorylation, including those previously implicated as effectors of the UPR such as in *Atf4*, *Atf5*  
340 and *Chop* [34-39]. These high-resolution data confirm again that there is a close interplay between  
341 virus infection and the UPR, with the host activating the UPR to combat the effects of virus  
342 infection, and viruses sometimes manipulating the UPR to promote replication and pathogenesis

343 [57-60]. The intimate association of CoVs with the ER during replication results in ER stress  
344 responses as the cell attempts to return to homeostasis [46, 61-65; reviewed in [66]).

345

346 The relative modulation of UPR branches differs between different CoVs [3,5,66]. For example,  
347 SARS-CoV infection does not lead to *Xbp-1* splicing [46] whereas the IRE1 pathway is activated by  
348 infectious bronchitis virus or MHV infection or by MHV S protein overexpression [29,67]. In spite  
349 of the observed *Xbp-1* mRNA splicing during MHV infection [29], Xbp-1s protein had not  
350 previously been detected in coronavirus-infected cells. In our study (8 h p.i. data set), an increased  
351 number of RPF reads mapped in the +2 reading frame of the *Xbp-1u* transcript corresponding to  
352 translation of the *Xbp-1s* frameshifted isoform.

353

354 Activation of the ATF6 pathway by CoV infection has not yet been fully addressed. ATF6 cleavage  
355 into its active form is observed during MHV infection but is significantly reduced at late time points  
356 [29]. On the other hand, the trimmed ATF6 form is not detected in SARS-CoV infected cells [68].  
357 Furthermore, ER stress-responsive promoters exhibit little activity under these conditions. In the  
358 present study, an induction of *BiP/Grp78* transcription due to ATF6 activation was observed to a  
359 similar extent in both tunicamycin-treated and MHV-infected cells, whereas BiP/Grp78 protein  
360 expression was only detected by western blotting in tunicamycin-treated cells. Ribosome profiling  
361 data revealed that, in virus-infected cells, the amount of RPFs corresponding to the *BiP* CDS was  
362 not as high as in tunicamycin-treated cells and this was probably the reason why this protein was  
363 not detected by western blot analysis.

364

365 With respect to the UPR-related inhibition mediated by eIF2 $\alpha$  phosphorylation, it has been shown  
366 that infectious bronchitis virus activates or suppresses protein kinase RNA-activated (PKR) and  
367 PERK during the course of an infection [69] whereas transmissible gastroenteritis virus protein 7  
368 emulates the function of DNA damage-inducible protein 34 (GADD34) to dephosphorylate eIF2 $\alpha$

369 [70]. Our study has now shown that MHV-A59 infection increases the level of p-eIF2 $\alpha$  and ATF4  
370 from 5 h p.i. onwards. The RiboSeq data also revealed decreased translation of the *Atf4* uORF2 at 8  
371 h p.i. and a concomitant increase in translation of the main ORF. Although [29] failed to detect the  
372 products of ATF4 target genes, *Gadd34* and *Chop*, during MHV infection by western blotting, we  
373 found evidence supporting an increase in transcription and translation of *Chop* at later time points  
374 p.i.

375

376 We tested the effect of the selective PERK inhibitor GSK-260614 on MHV replication [55,56].  
377 GSK-260614 (IC<sub>50</sub> = 0.4 nM) exhibits >1000-fold selectivity for PERK over heme-regulated eIF2 $\alpha$   
378 (HR1) and PKR. Up to 5  $\mu$ M of this inhibitor was well tolerated by 17 Cl-1 cells and, in MHV-  
379 infected cells, the prevention of eIF2 $\alpha$  phosphorylation alleviated the inhibition in translation of  
380 cellular and viral proteins as expected. Surprisingly, the higher content of viral proteins did not lead  
381 to a more prominent cytopathic effect but instead delayed syncytia formation and reduced viral titre.  
382 Therefore, we conclude that UPR-mediated eIF2 $\alpha$  phosphorylation may be favourable to MHV  
383 replication – perhaps by preventing translation of various anti-viral factors – and the  
384 pharmacological manipulation of this UPR branch can be explored as a potential target for antiviral  
385 intervention.

386

387 Our previous analysis of RPFs mapping to host mRNAs during MHV infection [16] indicated a  
388 remarkable perturbation in ribosome distributions at late time points, with a greatly increased  
389 proportion of RPFs mapping to the first ~30–40 codons of coding regions. In yeast, it has been  
390 reported that an accumulation of reads in the 5' region of coding sequences specifically under cell  
391 stress is an effect of cycloheximide pretreatment, and it has been hypothesized that stressed cells  
392 might have a slower rate of cycloheximide uptake leading to increased mean post-initiation  
393 ribosome run-on times prior to cycloheximide-induced arrest of elongation [43,44]. Thus, it was  
394 unclear whether this artefact might also occur in mammalian cells given that mammalian cells lack



395 a cell wall. Our results show that this does indeed extend to mammalian cells and thus call into  
396 question the interpretations put forward by [41] and [42] for the similar perturbations in ribosome  
397 density observed when cells were subjected to heat shock or proteotoxic stress. Further, we find that  
398 the magnitude of this artefact depends on the type of stress and, in the case of MHV infection, is not  
399 alleviated by increasing the concentration of cycloheximide to 100 times the standard amount, but  
400 can be alleviated completely by flash freezing without cycloheximide pretreatment. Since the  
401 artefact also occurs in mammalian cells, it is possible that it is not related simply to cycloheximide  
402 uptake rates. Potentially it may instead be related to dysregulation of the translational machinery  
403 under stress in a way that reduces cycloheximide efficiency (e.g. due to alterations in ribosomal exit  
404 (E)-site tRNA occupancy).

405

406 Ribosome profiling provides information on initiating and elongating 80S ribosomes but it does not  
407 account for free monosomes or early stages in initiation prior to formation of the 80S complex.  
408 Analytical polysome profiling showed an accumulation of 80S monosomes in MHV-infected cells  
409 from 5 h p.i. with the vast majority not being associated with mRNA which is a typical outcome of  
410 impaired translation [71]. This suggests that protein translation was inhibited at the stage of  
411 initiation probably due to the activation of the PERK branch in response to ER stress and the  
412 concomitant phosphorylation of eIF2 $\alpha$ . Phosphorylated eIF2 $\alpha$  (p-eIF2 $\alpha$ ) forms a stable complex  
413 with eIF2B – the guanine exchange factor responsible for recycling inactive eIF2-GDP to eIF2-GTP  
414 – which rapidly reduces the pool of available eIF2B. This prevents recycling of the ternary complex  
415 of eIF2, GTP and Met-tRNA<sub>i</sub> and formation of the 43S pre-initiation complex, and thus leads to a  
416 general shutdown of protein synthesis by inhibition of initiation [72].

417

418 Viruses commonly employ translational shutoff mechanisms to facilitate viral replication. On the  
419 one hand, shut-off of host cell translation can redirect the translation machinery towards viral gene  
420 expression if the virus has evolved non-canonical modes of translation, such as internal ribosome



421 entry site (IRES) mediated initiation. On the other hand, the shut-off of host cell protein synthesis  
422 will inhibit a range of cellular anti-viral responses. Previous studies have shown that MHV can  
423 induce host translational shutoff and mRNA decay in LR7 cells with the concomitant formation of  
424 stress granules and processing bodies [28]. Furthermore, a number of reports have demonstrated  
425 that CoV nsp1, the most N-terminal product of the replicase polyprotein, modulates host protein  
426 synthesis. In different CoVs, nsp1 has been shown to associate with the 40S ribosomal subunit thus  
427 preventing viral and cellular mRNA translation; induce cellular mRNA degradation via an  
428 endonucleolytic mRNA cleavage in the 5' region of capped mRNA; and selectively target nuclear  
429 host mRNAs and transport them to the cytoplasm for degradation [30-31,73-74]. The involvement  
430 of nsp1 in host protein translation could not be ruled out in this study without a comparison with a  
431 mutant virus lacking nsp1. However, the UPR-related translational modulation and the CoV nsp1-  
432 related modification of translation (and mRNA degradation) testify to the complexity of cellular  
433 translational shutoff mechanisms utilized by CoVs. How MHV proteins can be synthesized in a  
434 state of global translation inhibition has been the subject of previous speculation. Viral mRNAs  
435 contain a common 5'-leader sequence (65–90 nucleotides long) that could bind to the nucleocapsid  
436 (N) protein to form a complex that might act as a strong translation initiation signal [75], or the  
437 leader RNA sequence may bind to nsp1, protecting the viral mRNAs from nsp1-induced RNA  
438 cleavage [74,76]. However, we found previously that virus mRNAs 2–7 were translated with  
439 generally similar efficiencies during infection and, importantly, were not preferentially translated  
440 relative to host mRNAs. Thus we concluded that the synthesis of large quantities of virus proteins,  
441 especially N, was achieved mainly through high levels of transcription [16].

442

443 In conclusion, this study provides a survey of coronavirus effects on the cellular transcriptome and  
444 translome, complementing previous investigations on the UPR and host cell shutoff during MHV  
445 infection. The results of our analyses will help inform further investigations on host-CoV  
446 interactions and may help identify new targets for antiviral intervention.

447

448 **Materials and Methods:**

449

450 **Ribosomal profiling and RNASeq data:** Virus sequencing data (RNASeq and RiboSeq with  
451 cycloheximide pretreatment) were generated previously [16] and have been deposited in the  
452 ArrayExpress database (<http://www.ebi.ac.uk/arrayexpress>) under the accession number E-MTAB-  
453 4111.

454 Data for the tunicamycin and flash freezing sequencing experiments have been deposited in  
455 ArrayExpress under the accession numbers E-MTAB-5391 and E-MTAB-6278 respectively.

456

457 For the tunicamycin experiments, 17 Cl-1 cells were incubated in the presence of tunicamycin (2  
458  $\mu\text{g/ml}$ ) and, after 6 h, cells were treated with CHX (Sigma-Aldrich; to 100  $\mu\text{g/ml}$  or 10  $\text{mg/ml}$ ; 2  
459 min). Cells were rinsed with 5 ml of ice-cold PBS and then submerged in a reservoir of liquid  
460 nitrogen for 10 s. For flash freezing experiments, cells were rinsed with 5 ml of ice-cold PBS and  
461 then submerged in liquid nitrogen for 10 s. Cell lysates were subjected to RiboSeq and RNASeq as  
462 previously described [16,77].

463

464 **Computational analysis of RiboSeq and RNASeq data:** Reads were trimmed for adaptor  
465 sequences, filtered for length  $\geq 25$  nt, and reads mapping to *Mus musculus* rRNA (with up to 2  
466 mismatches) removed, as previously described [16]. The remaining reads were aligned directly to  
467 the mouse genome (UCSC, assembly mm10) (with up to 2 mismatches) using TopHat (parameters:  
468 --no-novel-juncs --bowtie1 --prefilter-multihits --max-multihits 500, with --transcriptome-index  
469 defined using the genes.gtf file from the UCSC mm10 annotation available from the TopHat  
470 website) [78]. Reads were tabulated using htseq-count (parameters: -t CDS -m intersection-strict -i  
471 gene\_id -s yes), using the NCBI RefSeq mRNAs as the gene feature annotation. For differential  
472 expression analyses, the htseq-count parameter “-type CDS” was used to count only those reads

473 (both RiboSeq and RNASeq) that mapped to the annotated coding regions of transcripts [79]. Thus  
474 the differential expression analyses exclude reads mapping to uORFs or non-annotated coding  
475 sequences (unless such sequences overlap the main annotated ORF).

476

477 Differential expression analyses on RNASeq or RiboSeq count data were performed with DESeq  
478 [20], EdgeR [21], NOISeq [22] and BaySeq [23]. Read counts were normalized by library size prior  
479 to comparison and low count genes (genes with fewer than 1 count per million reads mapping to the  
480 CDS in either the infected or mock libraries) were discarded. For BaySeq analyses, the sample size  
481 used to calculate priors was set to 200000. For each comparison, two replicates from infected cells  
482 at a specific timepoint were compared to four libraries from uninfected cells (two each at 1 and 8 h).  
483 Changes in translation efficiency (TE) were estimated using Bayseq in the paired library mode,  
484 Babel [32] and Xtail [33]. A given gene was considered to be differentially expressed if the FDR  
485 was less than 0.05 and the fold change between the averages of infected and mock replicates was  
486 greater than two. Volcano plots and inter-replicate consistency plots were generated using standard  
487 R plotting features and FDR and  $\log_2(\text{fold change})$  values from the BaySeq, Babel and Xtail  
488 analyses.

489

490 As reads were mapped to the genome, genomic read mapping locations had to be converted to  
491 transcript-specific coordinates to generate RNASeq and RPF profiles for specific transcripts. Tophat  
492 bam files were sorted by genomic coordinate and indexed using SAMTools [80]. A custom R script  
493 using Rsamtools [81] was developed to extract reads at a given series of genomic loci from the bam  
494 file (corresponding to the exon sequences of a given transcript isoform), convert the genomic  
495 positions of reads to positions relative to the transcript sequence, calculate the phasing of the reads,  
496 and generate plots showing the distribution of reads on the transcript. In some cases it is not  
497 possible to definitively distinguish usage of alternative exons or changes in transcription start sites  
498 or initiation codon utilization. The advantage of the aforementioned visualization process is that it

499 retains all reads mapping to a given exon allowing for easy manual inspection of data which may  
500 originate from different isoforms. In individual gene plots, read positions for RPFs were offset +12  
501 nt to map the approximate P-site.

502

503 Histograms of 5' end positions of host mRNA reads relative to initiation and termination codons  
504 were derived from reads mapping to RefSeq mRNAs with annotated CDSs  $\geq 450$  nt in length and  
505 with annotated 5' and 3' UTRs  $\geq 60$  nt in length. All figures are based on total numbers of mapped  
506 reads, rather than weighted sums for highly expressed mRNAs.

507

508 Ribosome accumulation at the 5' end of coding sequences was assessed via a 5' loading ratio  
509 statistic. Specifically, the density of RPFs with estimated P-sites mapping within nucleotide  
510 positions 16–90 of a given ORF was compared with the density of reads in the downstream portion  
511 of the ORF (ending 15 nt before the ORF stop codon). These windows were designed to exclude the  
512 accumulation of ribosomes involved in initiation and termination. We then compared the loading  
513 ratio in infected samples with the loading ratio in mocks for each gene.

514

515 **Cells and virus:** Murine 17 clone 1 (17 Cl-1) ([82], a kind gift of Dr Stanley Sawicki, University of  
516 Toledo) cells were maintained in Dulbecco's modification of Eagle's medium supplemented with  
517 10% (vol/vol) fetal calf serum (FCS). Recombinant MHV strain A59 (MHV-A59) was derived as  
518 previously described ([83], a kind gift of Dr Stanley Sawicki, University of Toledo, ATCC VR764).  
519 Upon reaching 70–80% confluence, 17 Cl-1 cells were infected with MHV-A59 at MOI 10 in  
520 infection medium [Hank's balanced salt solution (HBSS) containing 50  $\mu\text{g/ml}$  DEAE-dextran and  
521 0.2% bovine serum albumin (BSA)]. After 45 min at 37 °C, the inoculum was removed and the cells  
522 were incubated in DMEM containing 10% FCS, 100 U/ml penicillin and 100  $\mu\text{g/ml}$  streptomycin at  
523 37 °C until harvest.

524 17 Cl-1 mock and MHV-infected cells were treated with different concentrations (1–5  $\mu$ M) of the  
525 PERK-inhibitor GSK-2606414, a kind gift of Dr Edward Emmott and Prof Ian Goodfellow. GSK-  
526 2606414 was added to the cells just after the adsorption time and maintained until cells were  
527 harvested.

528

529 **Quantitative real-time PCR assays:** Total RNA was isolated as described previously [76] for  
530 RNA-Seq analysis, and cDNA was synthesized from 1  $\mu$ g total RNA. Transcript levels were  
531 determined by quantitative real-time PCR using a Rotor-Gene 3000 (Corbett Research). Reactions  
532 were performed in a final volume of 20  $\mu$ l containing Hot Start Taq (1 U; QIAGEN), 3.5 mM  
533  $MgCl_2$ , 2.5 mM deoxynucleotides, SYBR Green dye, 500 nM forward and reverse specific primers  
534 and 1  $\mu$ l of cDNA. After enzyme activation (95  $^{\circ}C$ , 15 min), amplification was carried out in a  
535 three-step PCR procedure (50 cycles: 15 s at 95  $^{\circ}C$  for denaturation, 20 s at 55  $^{\circ}C$  for annealing and  
536 20 s at 72  $^{\circ}C$  for extension). Non-template controls were included for each primer pair, and each  
537 PCR reaction was carried out in triplicate.

538

539 **Immunoblotting:** Proteins were separated by 10% or 12% SDS-PAGE and transferred to  
540 nitrocellulose membranes. These were blocked (5% non-fat milk powder in PBST [137 mM NaCl,  
541 2.7 mM KCl, 10 mM  $Na_2HPO_4$ , 1.5 mM  $KH_2PO_4$ , pH 6.7, and 0.1% Tween 20]) and probed with  
542 mouse monoclonal antibodies raised against N (1:1,000), S (1:500) - kind gifts of Dr Helmut Wege,  
543 University of Würzburg -, GAPDH (G8795, Sigma-Aldrich, 1:20,000), S6 (1:500, Cell Signaling);  
544 rabbit monoclonal antibodies against Grp78/BiP (1:1,000, Abcam) and RPL10a (1:500, Abcam); or  
545 polyclonal rabbit anti-ATF4 (1:500, Proteintech), anti-eIF2 $\alpha$  and anti-p(Ser-51)-eIF2 $\alpha$  (1:1,000,  
546 Cell Signaling). Membranes were incubated in the dark with an IRDye-conjugated secondary  
547 antibody in phosphate-buffered saline (PBS) and 0.1% Tween 20 [IRDye 800CW Donkey Anti-  
548 Mouse IgG (H+L), IRDye 800CW Donkey Anti-Rabbit IgG (H+L), IRDye 680RD Goat Anti-

549 Mouse IgG (H+L) and IRDye 680RD Goat Anti-Mouse IgM ( $\mu$  chain specific)]. Blots were  
550 scanned using an Odyssey Infrared Imaging System (Licor).

551

552 **Polysome profiling:** 17 Cl-1 cells were infected as previously described. Ten minutes prior to  
553 harvesting, cells were treated with cycloheximide (100  $\mu$ g/ml), washed with PBS and lysed in a  
554 buffer containing 20 mM Tris HCl pH 7.5, 100 mM KCl, 5 mM MgOAc, 0.375 mM CHX, 1 mM  
555 DTT, 0.1 mM PMSF, 2U/ $\mu$ l DNase I, 0.5% NP-40, supplemented with protease and phosphatase  
556 inhibitors (ThermoFisher Scientific). Following trituration with a 26-G needle (ten passes), lysates  
557 were cleared (13,000 g at 4 °C for 20 min) and the supernatants layered onto 12 mL sucrose density  
558 gradients (10–50% sucrose in TMK buffer – 20 mM Tris-HCl pH 7.5, 100 mM KCl, 5 mM MgCl<sub>2</sub>)  
559 prepared in Beckman SW41 polypropylene tubes using a Gradient Master (Biocomp). Following  
560 centrifugation (200,000 g for 90 min at 4 °C), fractions were prepared using an ISCO fractionator  
561 monitoring absorbance at 254 nm. Proteins were concentrated from fractions using methanol-  
562 chloroform extraction [84] and subjected to immunoblotting analysis. Polysome profiling in higher  
563 salt conditions was carried out as described above except that the lysis buffer and sucrose density  
564 gradient contained 400 mM KCl.

565

566 **Metabolic labelling:** 17 Cl-1 cell monolayers were infected with MHV A-59 at a MOI of 10  
567 PFU/cell. At 5 h p.i., cells were washed twice with PBS and labelled for 1 h in methionine-free  
568 DMEM supplemented with 125  $\mu$ Ci/ml [<sup>35</sup>S] methionine. After this period, cells were harvested,  
569 washed twice with PBS and resuspended in lysis buffer (50 mM Tris pH 7.5, 100 mM NaCl, 5 mM  
570 EDTA, 0.5% NP40). Cell lysate aliquots were mixed with Laemmli's sample buffer to a final  
571 concentration of 1 $\times$  and subjected to 10% SDS-PAGE followed by autoradiography.

572

## 573 **References:**

574 1. Channappanavar R, Perlman S (2017) Pathogenic human coronavirus infections: causes and  
575 consequences of cytokine storm and immunopathology. *Semin Immunopathol.* doi:  
576 10.1007/s00281-017-0629-x.

577

578 2. Walsh D, Mathews MB, Mohr I (2013) Tinkering with translation: protein synthesis in virus-  
579 infected cells. *Cold Spring Harb Perspect Biol* 5:a012351.

580

581 3. Fung TS, Liu DX (2014) Coronavirus infection, ER stress, apoptosis and innate immunity. *Front*  
582 *Microbiol* 5: 296.

583

584 4. Ron D, Walter P (2007) Signal integration in the endoplasmic reticulum unfolded protein  
585 response. *Nat Rev Mol Cell Biol* 8: 519-529.

586

587 5. Fung TS, Liao Y, Liu DX (2016) Regulation of stress responses and translational control by  
588 coronavirus. *Viruses* 8: E184.

589

590 6. Ingolia NT, Ghaemmaghami S, Newman JR, Weissman JS (2009) Genome-wide analysis in vivo  
591 of translation with nucleotide resolution using ribosome profiling. *Science* 324: 218-223.

592

593 7. Ingolia NT, Lareau LF, Weissman JS (2011) Ribosome profiling of mouse embryonic stem cells  
594 reveals the complexity and dynamics of mammalian proteomes. *Cell* 147: 789-802.

595

596 8. Ingolia NT (2014) Ribosome profiling: new views of translation, from single codons to genome  
597 scale. *Nat Rev Genet* 15: 205-213.

598

599 9. Stern-Ginossar N, Weisburd B, Michalski A, Le VT, Hein MY, Huang SX, Ma M, Shen B, Qian  
600 SB, Hengel H, et al (2012) Decoding human cytomegalovirus. *Science* 338: 1088-1093.

601

602 10. Liu X, Jiang H, Gu Z, Roberts, JW (2013) High-resolution view of bacteriophage lambda gene  
603 expression by ribosome profiling. *Proc Natl Acad Sci U S A* 110: 11928-11933.

604

605 11. Arias C, Weisburd B, Stern-Ginossar N, Mercier A, Madrid AS, Bellare P, Holdorf M,  
606 Weissman JS, Ganem D (2014) KSHV 2.0: a comprehensive annotation of the Kaposi's sarcoma-  
607 associated herpesvirus genome using next-generation sequencing reveals novel genomic and  
608 functional features. *PLoS Pathog* 10: e1003847.

609

610 12. Rutkowski AJ, Erhard F, L'Hernault A, Bonfert T, Schilhabel M, Crump C, Rosenstiel P,  
611 Efstathiou S, Zimmer R, Friedel CC, et al (2015) Widespread disruption of host transcription  
612 termination in HSV-1 infection. *Nat Commun* 6: 7126.

613

614 13. Tirosh O, Cohen Y, Shitrit A, Shani O, Le-Trilling VT, Trilling M, Friedlander G, Tanenbaum  
615 M, Stern-Ginossar N (2015) The transcription and translation landscapes during human  
616 cytomegalovirus infection reveal novel host-pathogen interactions. *PLoS Pathog* 11: e1005288.

617

618 14. Yang Z, Cao S, Martens CA, Porcella SF, Xie Z, Ma M, Shen B, Moss B (2015) Deciphering  
619 poxvirus gene expression by RNA sequencing and ribosome profiling. *J Virol* 89: 6874-6886.

620

621 15. Bercovich-Kinori A, Tai J, Gelbart IA, Shitrit A, Ben-Moshe S, Drori Y, Itzkovitz S,  
622 Mandelboim M, Stern-Ginossar N (2016) A systematic view on influenza induced host shutoff.  
623 *Elife* 5: e18311.

624

625 16. Irigoyen N, Firth AE, Jones JD, Chung BY, Siddell SG, Brierley I (2016) High-resolution  
626 analysis of coronavirus gene expression by RNA sequencing and ribosome profiling. *PLoS Pathog*  
627 12: e1005473.

628



- 629 17. Dai A, Cao S, Dhungel P, Luan Y, Liu Y, Xie Z, Yang Z (2017) Ribosome profiling reveals  
630 translational upregulation of cellular oxidative phosphorylation mRNAs during vaccinia virus-  
631 induced host shutoff. *J Virol* 91: e01858.16.  
632
- 633 18. Irigoyen N, Dinan AM, Brierley I, Firth AE (2018) Ribosome profiling of the retrovirus murine  
634 leukemia virus. *Retrovirology* 15: 10.  
635
- 636 19. Reid DW, Campos RK, Child JR, Zheng T, Chan KWK, Bradrick SS, Vasudevan SG, Garcia-  
637 Blanco MA, Nicchitta CV (2018) Dengue virus selectively annexes endoplasmic reticulum-  
638 associated translation machinery as a strategy for co-opting host cell protein synthesis. *J Virol*  
639 92:e01766-17.  
640
- 641 20. Anders S, Reyes A, Huber W (2012) Detecting differential usage of exons from RNA-seq data.  
642 *Genome Res* 22: 2008-2017.  
643
- 644 21. Robinson MD, McCarthy DJ, Smyth GK (2010) edgeR: a Bioconductor package for differential  
645 expression analysis of digital gene expression data. *Bioinformatics* 26: 130-140.  
646
- 647 22. Tarazona S, Furió-Tarí P, Turrà D, Pietro AD, Nueda MJ, Ferrer A, Conesa A (2015) Data  
648 quality aware analysis of differential expression in RNA-seq with NOISeq R/Bioc package. *Nucleic*  
649 *Acids Res* 43: e140.  
650
- 651 23. Hardcastle TJ, Kelly KA (2010) baySeq: empirical Bayesian methods for identifying differential  
652 expression in sequence count data. *BMC Bioinformatics* 11: 422.  
653
- 654 24. Hollien J, Weissman JS (2006) Decay of endoplasmic reticulum-localized mRNAs during the  
655 unfolded protein response. *Science* 313: 104-107.  
656
- 657 25. Hiramatsu N, Joseph VT, Lin JH (2011) Monitoring and manipulating mammalian unfolded  
658 protein response. *Methods Enzymol* 491: 183-198.  
659
- 660 26. Siddell SG, Wege H, Barthel, A, ter Meulen V (1980) Coronavirus JHM: cell-free synthesis of  
661 structural protein p60. *J Virol* 33: 10-17.  
662
- 663 27. Hilton A, Mizzen L, MacIntyre G, Cheley S, Anderson R (1986) Translational control in murine  
664 hepatitis virus infection. *J Gen Virol* 67: 923-932.  
665
- 666 28. Raaben M, Groot Koerkamp MJ, Rottier PJ, de Haan CA (2007) Mouse hepatitis coronavirus  
667 replication induces host translational shutoff and mRNA decay, with concomitant formation of  
668 stress granules and processing bodies. *Cell Microbiol* 9: 2218-2229.  
669
- 670 29. Bechill J, Chen Z, Brewer JW, Baker SC (2008) Coronavirus infection modulates the unfolded  
671 protein response and mediates sustained translational repression. *J Virol* 82: 4492-4501.  
672
- 673 30. Kamitani W, Huang C, Narayanan K, Lokugamage KG, Makino S (2009) A two-pronged  
674 strategy to suppress host protein synthesis by SARS coronavirus Nsp1. *Nat Struct Mol Biol* 16:  
675 1134-1140.  
676
- 677 31. Lokugamage KG, Narayanan K, Nakagawa K, Terasaki K, Ramirez SI, Tseng CT, Makino S  
678 (2015) Middle east respiratory syndrome coronavirus nsp1 inhibits host gene expression by  
679 selectively targeting mRNAs transcribed in the nucleus while sparing mRNAs of cytoplasmic  
680 origin. *J Virol* 89: 10970-10981.



- 681  
682 32. Olshen AB, Hsieh AC, Stumpf CR, Olshen RA, Ruggero D, Taylor BS (2013) Assessing gene-  
683 level translational control from ribosome profiling. *Bioinformatics* 29: 2995-3002.  
684  
685 33. Xiao Z, Zou Q, Liu Y, Yang X (2016) Genome-wide assessment of differential translations with  
686 ribosome profiling data. *Nat Commun* 7: 11194.  
687  
688 34. Lu PD, Harding HP, Ron D (2004) Translation reinitiation at alternative open reading frames  
689 regulates gene expression in an integrated stress response. *J Cell Biol* 167: 27-33.  
690  
691 35. Vattam KM, Wek RC (2004) Reinitiation involving upstream ORFs regulates ATF4 mRNA  
692 translation in mammalian cells. *Proc Natl Acad Sci U S A* 101: 11269-11274.  
693  
694 36. Watatani Y, Ichikawa K, Nakanishi N, Fujimoto M, Takeda H, Kimura N, Hirose H, Takahashi  
695 S, Takahashi Y (2008) Stress-induced translation of ATF5 mRNA is regulated by the 5'-  
696 untranslated region. *J Biol Chem* 283: 2543-2553.  
697  
698 37. Zhou D, Palam LR, Jiang L, Narasimhan J, Staschke KA, Wek RC (2008) Phosphorylation of  
699 eIF2 directs ATF5 translational control in response to diverse stress conditions. *J Biol Chem* 283:  
700 7064-7073.  
701  
702 38. Palam LR, Baird TD, Wek RC (2011) Phosphorylation of eIF2 facilitates ribosomal bypass of  
703 an inhibitory upstream ORF to enhance CHOP translation. *J Biol Chem* 286: 10939-10949.  
704  
705 39. Andreev DE, O'Connor PB, Fahey C, Kenny EM, Terenin IM, Dmitriev SE, Cormican P,  
706 Morris DW, Shatsky IN, Baranov PV (2015) Translation of 5' leaders is pervasive in genes resistant  
707 to eIF2 repression. *Elife* 4: e03971.  
708  
709 40. Gerashchenko MV, Lobanov AV, Gladyshev VN (2012) Genome-wide ribosome profiling  
710 reveals complex translational regulation in response to oxidative stress. *Proc Natl Acad Sci U S A*  
711 109: 17394-17399.  
712  
713 41. Liu B, Han Y, Qian SB (2013) Cotranslational response to proteotoxic stress by elongation  
714 pausing of ribosomes. *Mol Cell* 49: 453-463.  
715  
716 42. Shalgi R, Hurt JA, Krykbaeva I, Taipale M, Lindquist S, Burge CB (2013) Widespread  
717 regulation of translation by elongation pausing in heat shock. *Mol Cell* 49: 439-452.  
718  
719 43. Gerashchenko MV, Gladyshev VN (2014) Translation inhibitors cause abnormalities in  
720 ribosome profiling experiments. *Nucleic Acids Res* 42: e134.  
721  
722 44. Duncan CDS, Mata J (2017) Effects of cycloheximide on the interpretation of ribosome  
723 profiling experiments in *Schizosaccharomyces pombe*. *Sci Rep* 7: 10331.  
724  
725 45. Jiang XS, Tang LY, Dai J, Zhou H, Li SJ, Xia QC, Wu JR, Zeng R (2005) Quantitative analysis  
726 of severe acute respiratory syndrome (SARS)-associated coronavirus-infected cells using proteomic  
727 approaches: implications for cellular responses to virus infection. *Mol Cell Proteomics* 4: 902-913.  
728  
729 46. Versteeg GA, van de Nes PS, Bredenbeek PJ, Spaan WJ (2007) The coronavirus spike protein  
730 induces endoplasmic reticulum stress and upregulation of intracellular chemokine mRNA  
731 concentrations. *J Virol* 81: 10981-10990.  
732

- 733 47. Yeung YS, Yip CW, Hon CC, Chow KY, Ma IC, Zeng F, Leung FC (2008) Transcriptional  
734 profiling of Vero E6 cells over-expressing SARS-CoV s2 subunit: insights on viral regulation of  
735 apoptosis and proliferation. *Virology* 371: 32-43.  
736
- 737 48. Ye J, Rawson RB, Komuro R, Chen X, Davé UP, Prywes R, Brown MS, Goldstein JL (2000)  
738 ER stress induces cleavage of membrane-bound ATF6 by the same proteases that process  
739 SREBPs. *Mol Cell* 6: 1355-1364.  
740
- 741 49. Haze K, Yoshida H, Yanagi H, Yura U, Mori K (1999) Mammalian transcription factor ATF6 is  
742 synthesized as a transmembrane protein and activated by proteolysis in response to endoplasmic  
743 reticulum stress. *Mol Biol Cell* 10:3787-3799.  
744
- 745 50. Yoshida H, Matsui T, Yamamoto A, Okada T, Mori K (2001) XBP1 mRNA is induced by  
746 ATF6 and spliced by IRE1 in response to ER stress to produce a highly active transcription factor.  
747 *Cell* 28: 881-891.  
748
- 749 51. Calton M, Zeng H, Urano F, Till JH, Hubbard SR, Harding HP, Clark SG, Ron D (2002) IRE1  
750 couples endoplasmic reticulum load to secretory capacity by processing the XBP-1 mRNA. *Nature*  
751 415: 92-96.  
752
- 753 52. Harding HP, Zhang Y, Ron D (1999) Protein translation and folding are coupled by an  
754 endoplasmic-reticulum-resident kinase. *Nature* 397: 271-274.  
755
- 756 53. Harding HP, Zhang Y, Bertolotti A, Zeng H, Ron D (2000) Perk is essential for translational  
757 regulation and cell survival during the unfolded protein response. *Mol Cell* 5: 897-904.  
758
- 759 54. Harding HP, Novoa I, Zhang Y, Zeng H, Wek R, Schapira M, Ron D (2000) Regulated  
760 translation initiation controls stress-induced gene expression in mammalian cells. *Mol Cell* 6: 1099-  
761 1108.  
762
- 763 55. Axten JM, Medina JR, Feng Y, Shu A, Romeril SP, Grant SW, Li WH, Heerding DA, Minthorn  
764 E, Mencken T, Atkins C, Liu Q, Rabindran S, Kumar R, Hong X, Goetz A, Stanley T, Taylor JD,  
765 Sigethy SD, Tomberlin GH, Hassell AM, Kahler KM, Shewchuk LM, Gampe RT (2012) Discovery  
766 of 7-methyl-5-(1-([3-(trifluoromethyl)phenyl]acetyl)-2,3-dihydro-1H-indol-5-yl)-7H-pyrrolo[2,3-  
767 d]pyrimidin-4-amine (GSK2606414), a potent and selective first-in-class inhibitor of protein kinase  
768 R (PKR)-like endoplasmic reticulum kinase (PERK). *J Med Chem* 55, 7193-7207.  
769
- 770 56. Harding HP, Zyryanova AF, Ron D (2012) Uncoupling proteostasis and development in vitro  
771 with a small molecule inhibitor of the pancreatic endoplasmic reticulum kinase, PERK. *J Biol Chem*  
772 287, 44338-44344.  
773
- 774 57. Lazar C, Uta M, Branza-Nichita N (2014) Modulation of the unfolded protein response by the  
775 human hepatitis B virus. *Front Microbiol* 5: 433.  
776
- 777 58. Carpenter JE, Grose C (2014) Varicella-zoster glycoprotein expression differentially induces the  
778 unfolded protein response in infected cells. *Front Microbiol* 5: 322.  
779
- 780 59. Chan SW (2014) The unfolded protein response in virus infections. *Front Microbiol* 5: 518.  
781
- 782 60. Perera N, Miller JL, Zitzmann N (2017) The role of the unfolded protein response in dengue  
783 virus pathogenesis. *Cell Microbiol* 19: doi: 10.1111/cmi.12734  
784

- 785 61. David-Ferreira JF, Manaker RA (1965) An electron microscopy study of the development of a  
786 mouse hepatitis virus in tissue culture cells. *J Cell Biol* 24: 57-78.  
787
- 788 62. Klumperman J, Locker JK, Meijer A, Horzinek MC, Geuze HJ, Rottier PJ (1994) Coronavirus  
789 M proteins accumulate in the Golgi complex beyond the site of virion budding. *J Virol* 68: 6523-  
790 6534.  
791
- 792 63. Stertz S, Reichelt M, Spiegel M, Kuri T, Martínez-Sobrido L, García-Sastre A, Weber F, Kochs  
793 G (2007) The intracellular sites of early replication and budding of SARS-coronavirus. *Virology*  
794 361: 304-315.  
795
- 796 64. Reggiori F, Monastyrska I, Verheije MH, Cali T, Ulasli M, Bianchi S, Bernasconi R, de Haan  
797 CA, Molinari M (2010) Coronaviruses hijack the LC3-I-positive EDEMosomes, ER-derived  
798 vesicles exporting short-lived ERAD regulators, for replication. *Cell Host Microbe* 7: 500-508.  
799
- 800 65. Maier HJ, Hawes PC, Cottam EM, Mantell J, Verkade P, Monaghan P, Wileman T, Britton P  
801 (2013) Infectious bronchitis virus generates spherules from zippered endoplasmic reticulum  
802 membranes. *MBio* 4: e00801-13.  
803
- 804 66. Fung TS, Liao Y, Liu DX (2014) The endoplasmic reticulum stress sensor IREa protects cells  
805 from apoptosis induced by the coronavirus infectious bronchitis virus. *J Virol* 88: 12752-12764.  
806
- 807 67. Fung TS, Huang M, Liu DX (2014) Coronavirus-induced ER stress response and its  
808 involvement in regulation of coronavirus-host interactions. *Virus Res* 194: 110-123.  
809
- 810 68. DeDiego ML, Nieto-Torres JL, Jiménez-Guardeño JM, Regla-Nava JA, Alvarez E, Oliveros JC,  
811 Zhao J, Fett C, Perlman S, Enjuanes L (2011) Severe acute respiratory syndrome coronavirus  
812 envelope protein regulates cell stress response and apoptosis. *PLoS Pathog* 7: e1002315.  
813
- 814 69. Liao Y, Fung TS, Huang M, Fang SG, Zhong Y, Liu DX (2013) Upregulation of  
815 CHOP/GADD153 during coronavirus infectious bronchitis virus infection modulates apoptosis by  
816 restricting activation of the extracellular signal-regulated kinase pathway. *J Virol* 87: 8124-8134.  
817
- 818 70. Cruz JL, Sola I, Becares M, Alberca B, Plana J, Enjuanes L, Zuñiga S (2011) Coronavirus gene  
819 7 counteracts host defenses and modulates virus virulence. *PLoS Pathog* 7: e1002090.  
820
- 821 71. Brina D, Grosso S, Miluzio A, Biffo S (2011) Translational control by 80S formation and 60S  
822 availability: the central role of eIF6, a rate limiting factor in cell cycle progression and  
823 tumorigenesis. *Cell Cycle* 10, 3441-3446.  
824
- 825 72. Hinnebusch AG (2014) The scanning mechanism of eukaryotic translation initiation. *Annu Rev*  
826 *Biochem* 83, 779-812.  
827
- 828 73. Kamitani W, Narayanan K, Huang C, Lokugamage K, Ikegami T, Ito N, Kubo H, Makino S  
829 (2006) Severe acute respiratory syndrome coronavirus nsp1 protein suppresses host gene expression  
830 by promoting host mRNA degradation. *Proc Natl Acad Sci U S A* 103: 12885-12890.  
831
- 832 74. Huang C, Lokugamage KG, Rozovics JM, Narayanan K, Semler BL, Makino S (2011) SARS  
833 coronavirus nsp1 protein induces template-dependent endonucleolytic cleavage of mRNAs: viral  
834 mRNAs are resistant to nsp1-induced RNA cleavage. *PLoS Pathog* 7: e1002433.  
835

- 836 75. Tahara SM, Dietlin TA, Bergmann CC, Nelson GW, Kyuwa S, Anthony RP, Stohlman SA  
837 (1994) Coronavirus translational regulation: leader affects mRNA efficiency. *Virology* 202: 621-  
838 630.
- 839
- 840 76. Tanaka T, Kamitani W, DeDiego ML, Enjuanes L, Matsuura Y (2012) Severe acute respiratory  
841 syndrome coronavirus nsp1 facilitates efficient propagation in cells through a specific translational  
842 shutoff of host mRNA. *J Virol* 86: 11128-11137.
- 843
- 844 77. Chung BY, Hardcastle TJ, Jones JD, Irigoyen N, Firth AE, Baulcombe DC, Brierley I (2015)  
845 The use of duplex-specific nuclease in ribosome profiling and a user-friendly software package for  
846 Ribo-seq data analysis. *RNA* 21: 1731-1745.
- 847
- 848 78. Trapnell C, Pachter L, Salzberg SL (2009) TopHat: discovering splice junctions with RNA-Seq.  
849 *Bioinformatics* 25: 1105-1111.
- 850
- 851 79. Anders S, Pyl PT, Huber W (2015) HTSeq - a Python framework to work with high-throughput  
852 sequencing data. *Bioinformatics* 31: 166-169.
- 853
- 854 80. Li H, Handsaker B, Wysoker A, Fennell T, Ruan J, Homer N, Marth G, Abecasis G, Durbin R;  
855 1000 Genome Project Data Processing Subgroup (2009) The sequence alignment/map format and  
856 SAMtools. *Bioinformatics* 25: 2078-2079.
- 857
- 858 81. Delhomme N, Padioulet I, Furlong EE, Steinmetz LM (2012) easyRNASeq: a bioconductor  
859 package for processing RNA-Seq data. *Bioinformatics* 28: 2532-2533.
- 860
- 861 82. Sturman LS, Takemoto KK (1972) Enhanced growth of a murine coronavirus in transformed  
862 mouse cells. *Infect Immun* 6: 501-507.
- 863
- 864 83. Coley SE, Lavi E, Sawicki SG, Fu L, Schelle B, Karl, N, Siddell SG, Thiel V (2005)  
865 Recombinant mouse hepatitis virus strain A59 from cloned, full-length cDNA replicates to high  
866 titers in vitro and is fully pathogenic *in vivo*. *J Virol* 79: 3097-3106.
- 867
- 868 84. Eckert EA (1966) Envelope protein(s) derived from influenza virus. *J Bacteriol* 91: 1907-1910.  
869

870 **Figure Captions:**

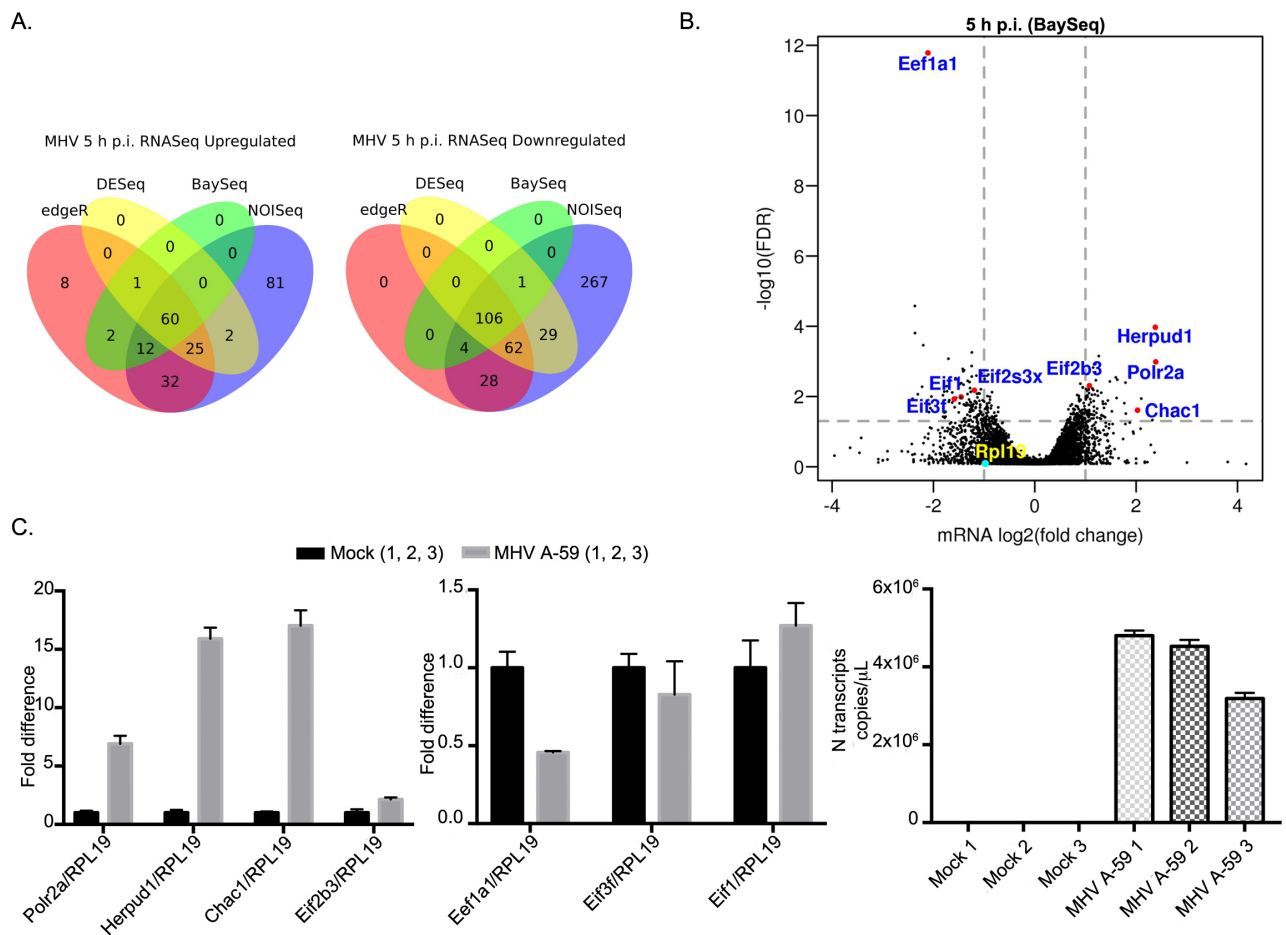

871

872 **Figure 1: Effect of MHV infection on cellular transcription.** (A) Venn diagrams of upregulated

873 (left panel) and downregulated (right panel) genes were derived from RNASeq data using four

874 different methods (edgeR, DESeq, BaySeq and NOISeq). A gene was considered to be

875 up/downregulated if it had  $\geq 2$  fold change and a FDR  $\leq 0.05$ . Calculations are based on four mock

876 (two each at 1 and 8 h) and two 5 h p.i. infected samples. (B) Volcano plot showing the relative

877 change in abundance of cellular genes and the FDR for differential expression using BaySeq. Grey

878 vertical and horizontal lines indicate a fold change of 2 and a FDR of 0.05, respectively. Selected

879 genes are annotated. (C) Quantitative real-time PCR (qRT-PCR) of N transcripts (right panel), and

880 selected down- (middle panel), and up- (left panel) regulated mRNAs in three biological replicates

881 of mock- and MHV-infected cells at 5 h p.i. Levels were normalized to ribosomal protein L19

882 (RPL19) transcript.

883

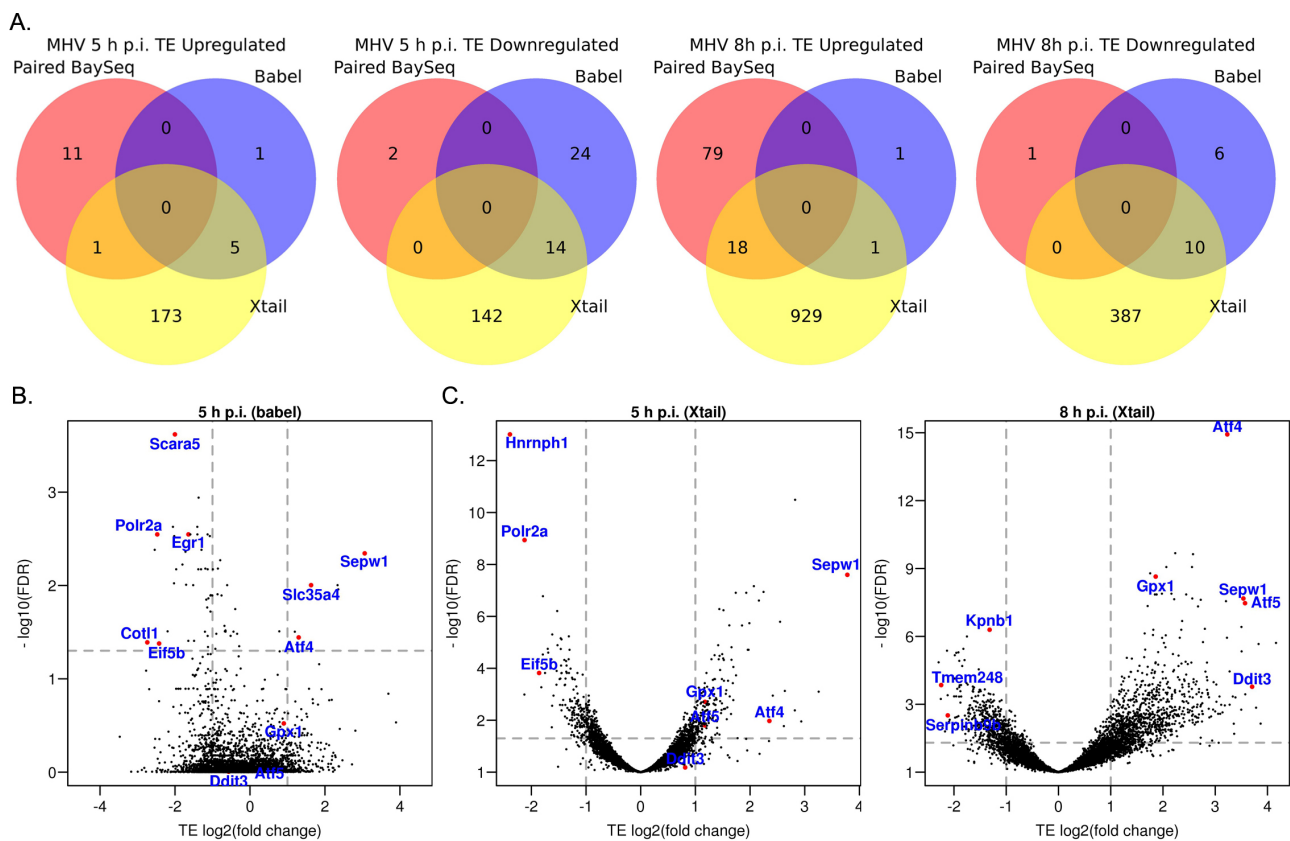

884

885 **Figure 2: Effects of MHV infection on translational efficiency (TE).** (A) Venn diagrams of TE  
 886 upregulated and downregulated genes using three different methods (Babel, Xtail and paired  
 887 BaySeq) at 5 h p.i. (left panels) and 8 h p.i. (right panels). A gene was considered to be  
 888 up/downregulated if it had  $\geq 2$  fold change and a  $FDR \leq 0.05$ . Calculations are based on four  
 889 RiboSeq/RNASeq pairs of mock (two each at 1 and 8 h) and two RiboSeq/RNASeq pairs of 5 or 8 h  
 890 p.i. infected samples. (B-C) Volcano plots showing the relative change in TE for cellular genes and  
 891 the FDR for differential expression using Babel or Xtail.



A.

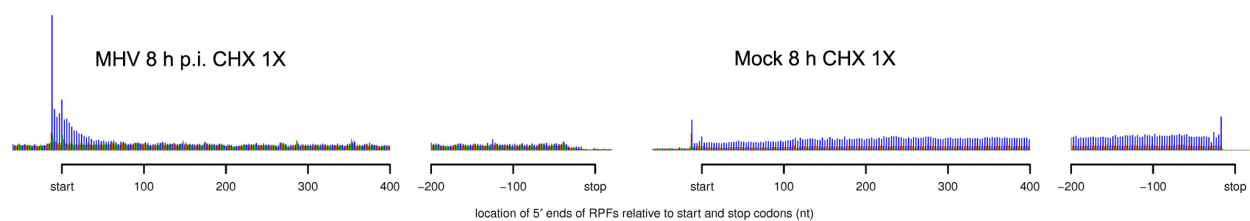

B.

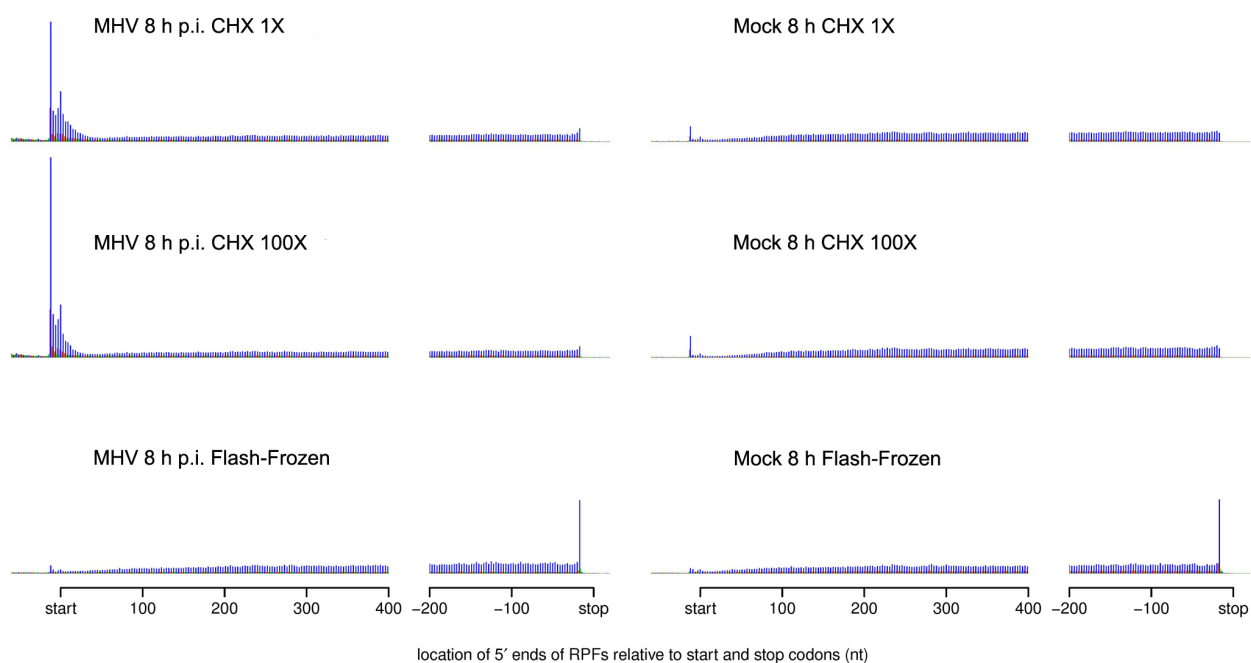

C.

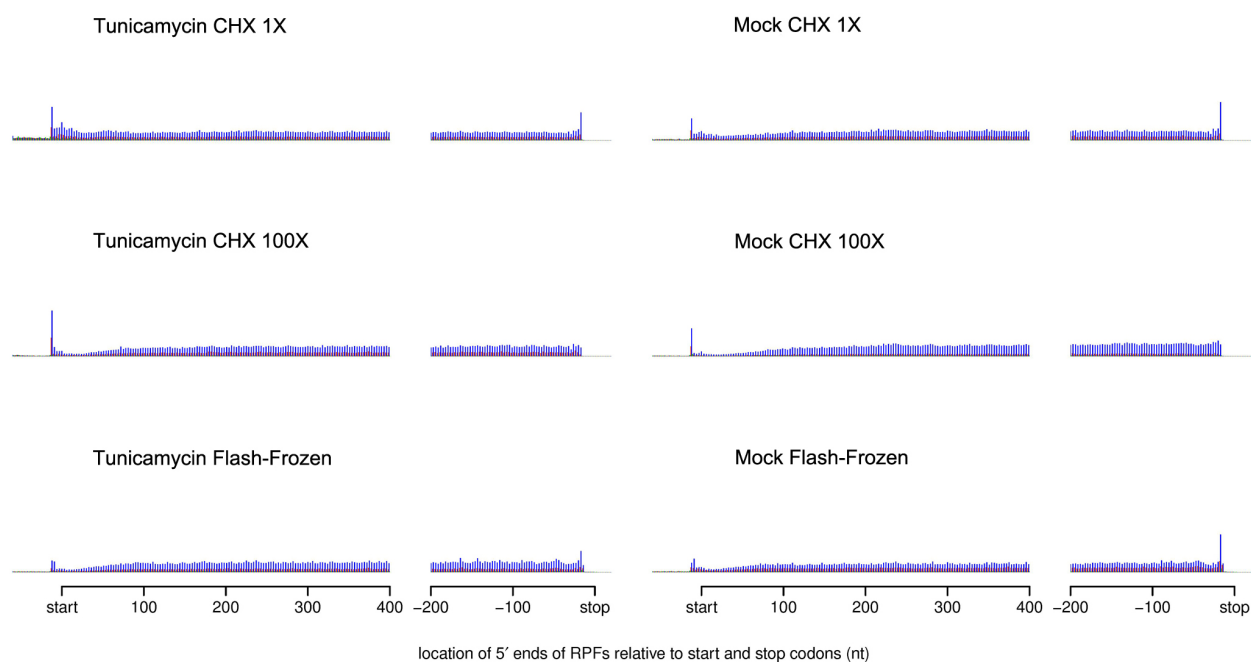

892

893

894

**Figure 3: Effects of cycloheximide on ribosome profiling of 17 Cl-1 cells infected with MHV-**

**A59. (A)** Mean RPF density on cellular mRNAs (arbitrary y-axis scaling). In the MHV 8 h p.i.

895 RiboSeq library, an increased proportion of reads map to the first ~30–40 codons of CDSs (data  
896 from [16]). **(B)** Meta-analysis of RPFs mapping to cellular mRNAs of 17 Cl-1 cells (right panels)  
897 and 8 h p.i. MHV-infected 17 Cl-1 cells (left panels), harvested with 100  $\mu\text{g}/\text{ml}$  cycloheximide  
898 (CHX 1X) or 10 mg/ml cycloheximide (CHX 100X) in the media or harvested by flash freezing in  
899 the absence of cycloheximide. **(C)** Meta-analysis of RPFs mapping to cellular mRNAs of 17 Cl-1  
900 cells (right panels) and 17 Cl-1 cells treated with tunicamycin (2  $\mu\text{g}/\text{ml}$  final concentration for 6 h)  
901 (left panels), harvested with 100  $\mu\text{g}/\text{ml}$  cycloheximide (CHX 1X) or 10 mg/ml cycloheximide  
902 (CHX 100X) in the media or harvested by flash freezing in the absence of cycloheximide.  
903

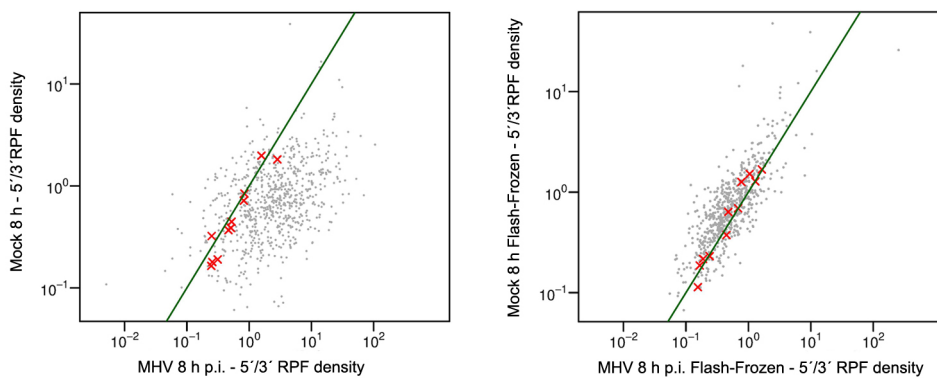

905 **Figure 4: Quantification of ribosome accumulation via a 5' loading ratio statistic.** Scatterplot  
906 comparing the relative density of RPFs in the 5' and 3' portions of cellular mRNA CDSs between  
907 mock and 8 h p.i. infected samples harvested with 100  $\mu\text{g}/\text{ml}$  cycloheximide (left panel) or by flash  
908 freezing (right panel). Only genes with  $\geq 50$  RPFs mapping between CDS positions 16 and 90 nt in  
909 the 8 h mock are shown. Points below the green diagonal line indicate mRNA species with  
910 increased ribosome density in the 5' regions of coding sequences in infected cells compared to  
911 mock. Red crosses represent mitochondrial CDSs.



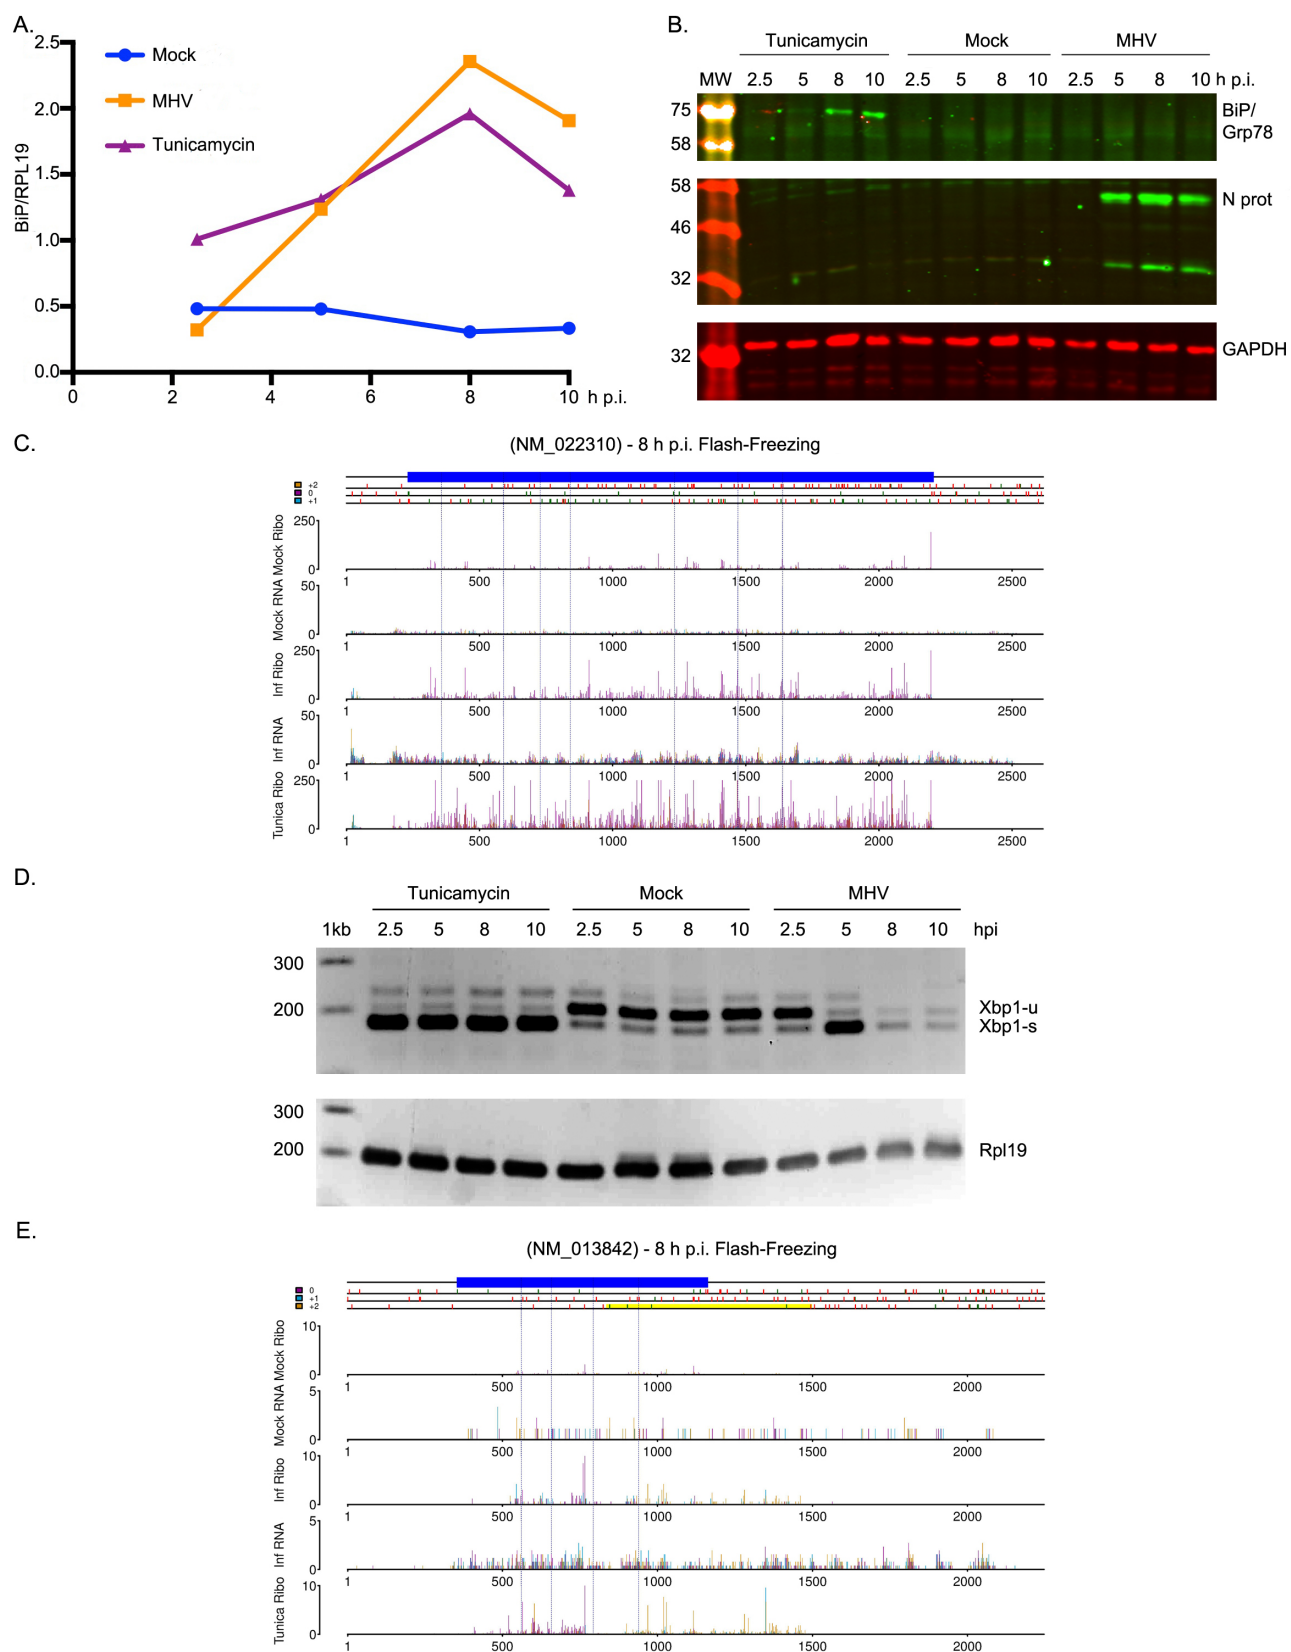

912

913 **Figure 5: Effect of MHV infection on unfolded protein response ATF6 and IRE 1 $\alpha$  activity.** 17

914 CI-1 cells were incubated in the presence of tunicamycin (2  $\mu$ g/ml) or infected with MHV-A59

915 (MOI 10) and harvested at 2.5, 5, 8 and 10 h p.i. (A) qRT-PCR of *BiP/Grp78* transcripts normalized

916 by *Rpl19* transcript. **(B)** Cell lysates were analysed by 12% SDS-PAGE and immunoblotted using  
917 anti-BiP/Grp78 and anti-N antibodies (green fluorescent secondary antibody). GAPDH was used as  
918 a loading control (red fluorescent secondary antibody). Molecular masses (kDa) are indicated on the  
919 left. **(C)** Analysis of RPFs (Mock Ribo, Inf Ribo and Tunica Ribo) and RNASeq (Mock RNA and  
920 Inf RNA) mapping to *BiP/Grp78*, also known as *Hspa5* (NCBI RefSeq mRNA NM\_022310)  
921 showing, from top to bottom, mock 8 h (Mock), MHV 8 h p.i. (Inf) and tunicamycin treated  
922 (Tunica) cells harvested by flash-freezing. Reads whose 5' end maps to the first, second or third  
923 positions of codons relative to the annotated CDS (blue rectangle) are indicated in purple, blue or  
924 orange, respectively. Green and red tick marks correspond to AUG and stop codons, respectively.  
925 Blue dotted vertical lines indicate annotated exon boundaries. The y-axis shows reads per million  
926 mapped to host mRNAs. Note that in order to properly visualize RPFs across the *BiP/Grp78* ORF,  
927 the y-axis has been truncated leaving some RPF counts for tunicamycin-treated cells off scale. S3  
928 Fig shows the non-modified gene-plot for *BiP/Grp78*. **(D)** RT-PCR analysis of *Xbp-1u* and *Xbp-1s*  
929 mRNAs. Total RNA (1µg) was subjected to RT-PCR analysis using primers flanking the *Xbp-1*  
930 splice site. PCR products were resolved in a 3% TBE-agarose gel and visualized by ethidium  
931 bromide staining. *Rpl19* RT-PCR product was used as a loading control. Molecular size markers  
932 (nt) are indicated on the left. Note as gel loads are normalised by total RNA concentration, *Xbp-1*  
933 mRNA levels appear to diminish at late timepoints in samples from MHV infected cells, as the  
934 increased viral RNA levels decrease the relative proportion of *Xbp1* transcripts in the load. **(E)**  
935 Analysis of RPFs (Mock Ribo, Inf Ribo and Tunica Ribo) and RNASeq (Mock RNA and Inf RNA)  
936 mapping to *Xbp-1u* (NCBI RefSeq mRNA NM\_013842) showing, from top to bottom, mock 8 h  
937 (Mock), MHV 8 h p.i. (Inf) and tunicamycin treated (Tunica) cells harvested by flash-freezing.  
938 Reads whose 5' end maps to the first, second or third positions of codons relative to the annotated  
939 *Xbp-1u* CDS (blue rectangle) are indicated in purple, blue or orange, respectively. Yellow  
940 rectangles indicate the extended ORF in *Xbp-1s*. Green and red tick marks, and blue dotted vertical

941 lines are as described in Fig 5C. Note that reads in the +2 frame downstream of the annotated stop  
 942 codon (yellow peaks) are derived from translation of the *Xbp-1s* spliced isoform.

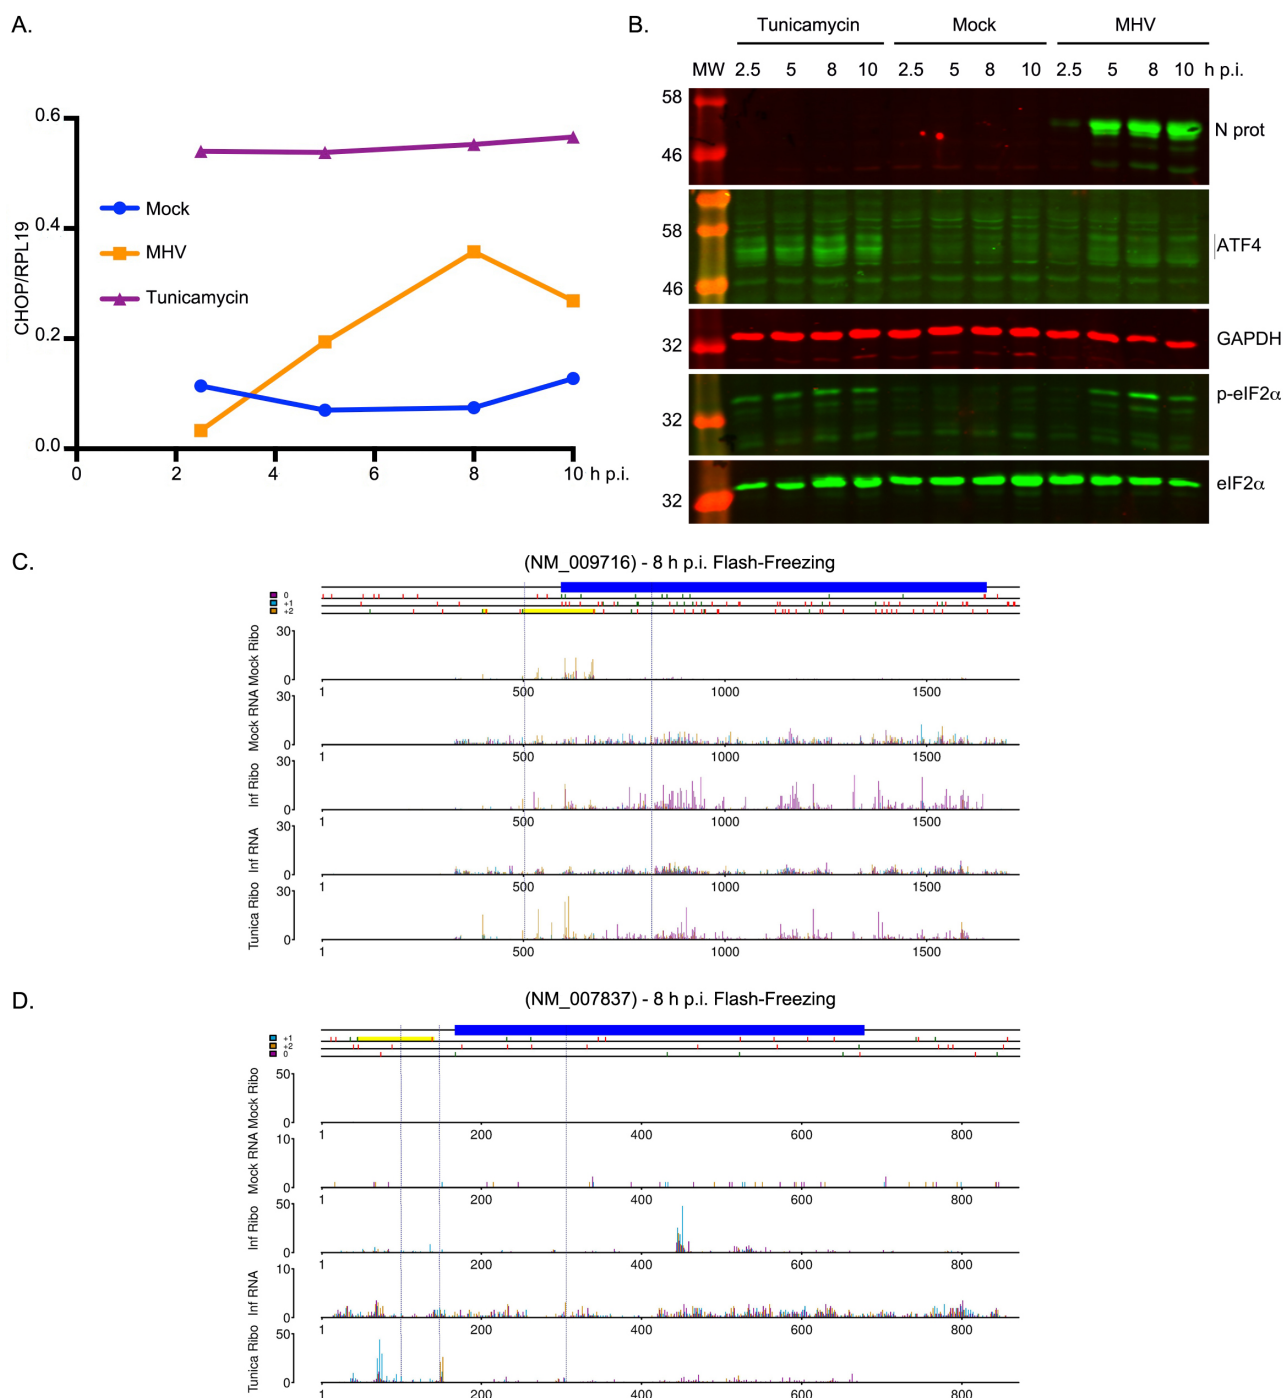

943

944 **Figure 6: Effect of MHV infection on unfolded protein response PERK-eIF2 $\alpha$ -ATF4 activity.**

945 17 Cl-1 cells were incubated in the presence of tunicamycin (2  $\mu$ g/ml) or infected with MHV-A59

946 (MOI 10) and harvested at 2.5, 5, 8 and 10 h p.i. (A) qRT-PCR of *Chop* transcripts normalized by

947 *Rpl19* transcript. (B) Cell lysates were separated by 12% SDS-PAGE and immunoblotted using

948 anti-ATF4, anti-p-eIF2 $\alpha$ , anti-eIF2 $\alpha$  and anti-N antibodies (green fluorescent secondary antibody).  
949 GAPDH was used as a loading control (red fluorescent secondary antibody). Molecular masses  
950 (kDa) are indicated on the left. **(C)** Analysis of RPFs (Mock Ribo, Inf Ribo and Tunica Ribo) and  
951 RNASeq (Mock RNA and Inf RNA) mapping to *Atf4* (NCBI RefSeq mRNA NM\_009716)  
952 showing, from top to bottom, mock 8 h (Mock), MHV 8 h p.i. (Inf) and tunicamycin treated  
953 (Tunica) cells harvested by flash freezing. Reads whose 5' end maps to the first, second or third  
954 positions of codons relative to the annotated CDS (blue rectangle) are indicated in purple, blue or  
955 orange, respectively. Yellow rectangles indicate the *Atf4* uORFs. Green and red tick marks, and  
956 blue dotted vertical lines are as described in Fig 5C. **(D)** Analysis of RPFs (Mock Ribo, Inf Ribo  
957 and Tunica Ribo) and RNASeq (Mock RNA and Inf RNA) mapping to *Chop*, also known as *Ddit3*  
958 (NCBI RefSeq mRNA NM\_007837) showing, from top to bottom, mock 8 h (Mock), MHV 8 h p.i.  
959 (Inf) and tunicamycin treated (Tunica) cells harvested by flash freezing. Reads whose 5' end maps  
960 to the first, second or third positions of codons relative to annotated CDS (blue rectangle) are  
961 indicated in purple, blue or orange, respectively. Green and red tick marks, and blue dotted vertical  
962 lines are as described in Fig 5C. Note that reads in the +1 frame upstream of the annotated start  
963 codon (blue reads) are derived from translation of the *Chop* uORF (yellow rectangle).

A.

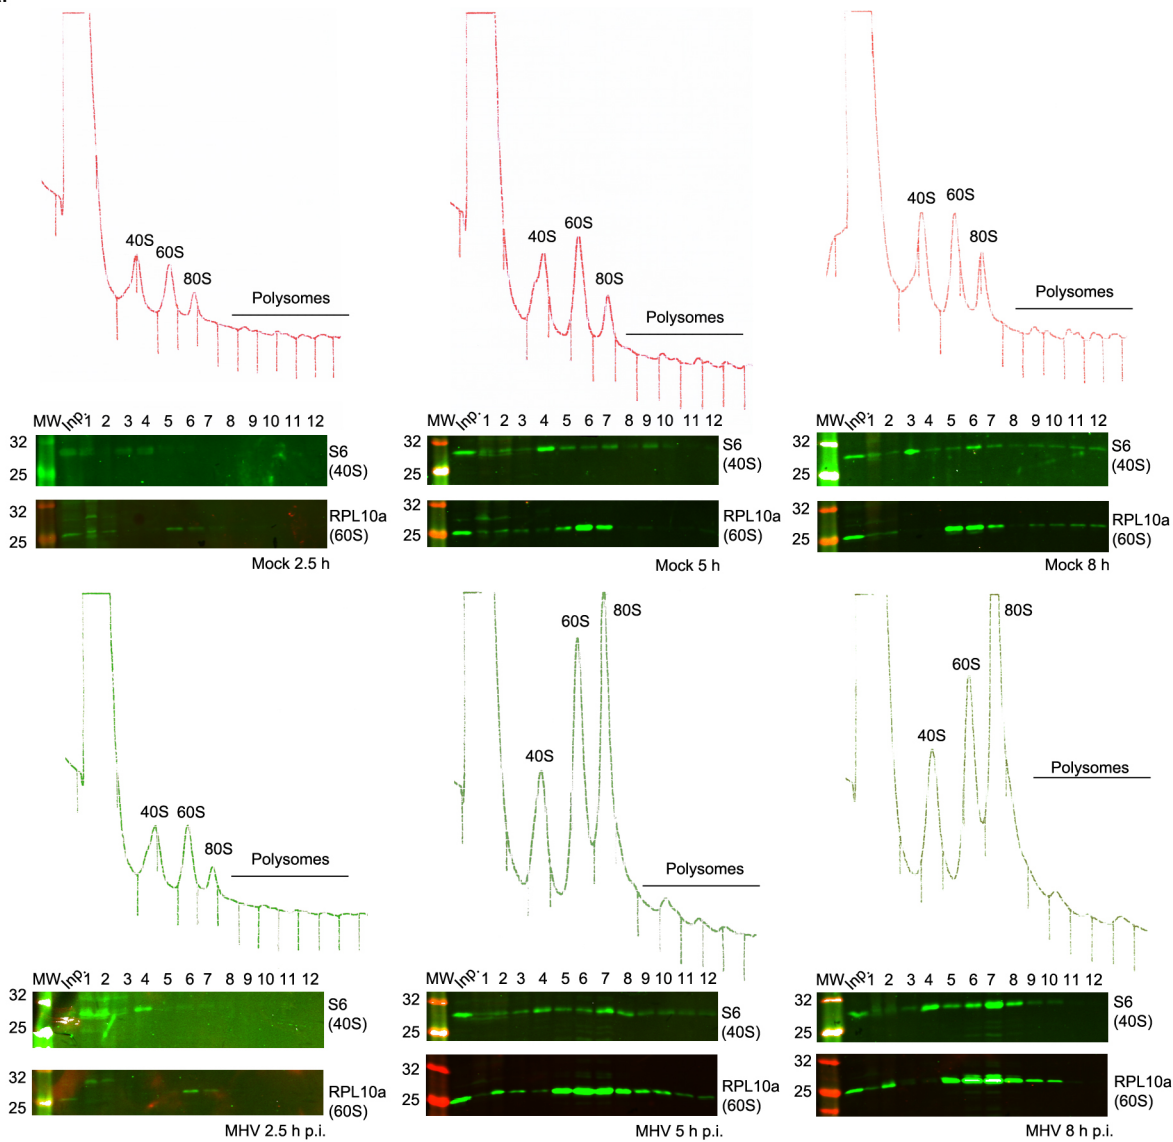

B.

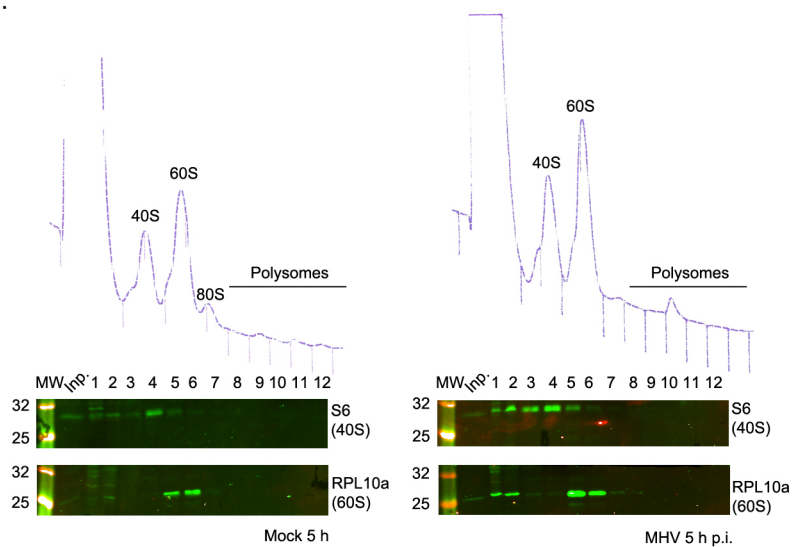

964  
965

966

**Figure 7: Polysome profiling of 17 Cl-1 cells infected with MHV-A59.** (A) Mock-infected (upper panel) and MHV-infected (lower panel) 17 Cl-1 cells were harvested at 2.5, 5 and 8 h p.i.



967 Cytoplasmic lysates were resolved on 10–50% sucrose density gradients. Gradients were  
968 fractionated and fractions monitored by absorbance ( $A_{254}$  nm). Twelve [numbered] fractions were  
969 collected and proteins extracted, resolved by 12% SDS-PAGE and analysed by immunoblotting  
970 using the indicated antibodies (anti-S6 as 40S marker, anti-RPL10 as 60S marker, anti-N and anti-  
971 S). (B) Mock-infected (left panel) and MHV-infected (right panel) 17 Cl-1 cells were harvested at 5  
972 h p.i. in high-salt lysis buffer (400 mM KCl) and analysed as described above. Molecular masses  
973 (kDa) are indicated on the left. Lane "Inp" contains whole cell lysate.

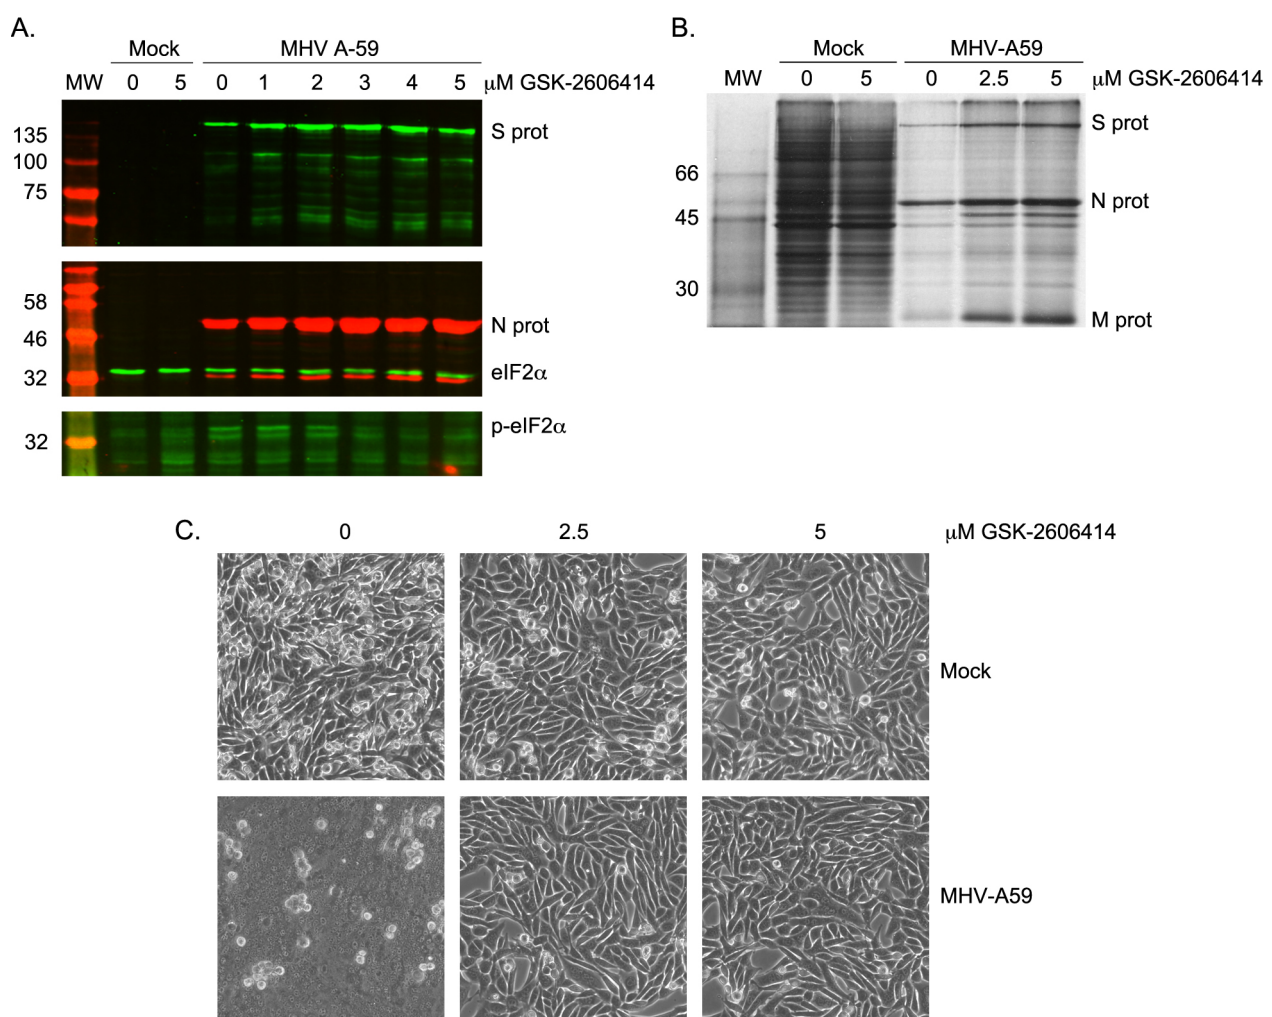

974

975 **Figure 8: Effect of GSK-2606414 on MHV-infected cells.** (A) 17 Cl-1 mock and MHV-infected  
976 cells were treated with 1–5  $\mu\text{M}$  of the PERK-inhibitor GSK-2606414. GSK-2606414 was added to  
977 the cells immediately after the virus adsorption period was completed and maintained in the  
978 medium until cells were harvested 5 h later. Cell lysates were separated by 12% SDS-PAGE and

979 immunoblotted using anti-S, anti-p-eIF2 $\alpha$  and anti-eIF2 $\alpha$  (green fluorescent secondary antibody),  
980 and anti-N sera (red fluorescent secondary antibody). Molecular masses (kDa) are indicated on the  
981 left. **(B)** 17 Cl-1 cells infected with MHV-A59 and treated with 0, 2.5 or 5  $\mu$ M of GSK-2606414  
982 were metabolically pulse-labeled with [<sup>35</sup>S]Met for 1 h at 5 h p.i. Cells were lysed just after pulse  
983 and subjected to 10% SDS-PAGE followed by autoradiography. **(C)** Representative images of  
984 mock and MHV-infected cells at 5 h p.i. treated with 0, 2.5 or 5  $\mu$ M of GSK-2606414.  
985  
986
