1

2

3

4

5

6 **Probing the unfolded protein response to mouse hepatitis coronavirus infection through RNA**  
7 **sequencing and ribosome profiling**

8

9 Georgia M. Cook<sup>1</sup>, Katherine Brown<sup>1</sup>, Krzysztof Franaszek<sup>1</sup>, Nathan A. Moore<sup>2,4</sup>, Stuart G.

10 Siddell<sup>2</sup>, Ian Brierley<sup>1</sup>, Andrew E. Firth<sup>1</sup>, Nerea Irigoyen<sup>1\*</sup>

11

12 <sup>1</sup>Division of Virology, Department of Pathology, University of Cambridge, Tennis Court Road,  
13 Cambridge CB2 1QP, United Kingdom.

14 <sup>2</sup>Department of Cellular and Molecular Medicine, University of Bristol, Bristol BS8 1TD, United  
15 Kingdom.

16 <sup>4</sup>Current address: Basingstoke and North Hampshire Hospital, Hampshire Hospitals, NHS  
17 Foundation Trust.

18

19 Running Title: Unfolded protein response to coronavirus infection

20 \*Corresponding author: [ni236@cam.ac.uk](mailto:ni236@cam.ac.uk)

21

22 **Keywords:** murine coronavirus, ribosome profiling, RNASeq, unfolded protein response,  
23 translation, protein synthesis.

24

25 **Abstract:**

26 Coronaviruses (CoVs) are enveloped, positive-sense RNA viruses with an unusually large RNA  
27 genome and a unique replication strategy. They cause important diseases in mammals and birds  
28 ranging from enteritis in cows and pigs and upper respiratory disease in chickens, to potentially  
29 lethal human respiratory infections. Here, we apply ribosome profiling and parallel RNA  
30 sequencing to analyse global changes in host cell transcriptome and translome upon infection with  
31 mouse hepatitis virus strain A59 (MHV-A59), a model murine coronavirus in the same genus as the  
32 human pathogens severe acute respiratory syndrome coronavirus (SARS-CoV) and Middle East  
33 respiratory syndrome coronavirus (MERS-CoV). Amongst differentially-regulated cellular genes,  
34 we observed up-regulation of all arms of the unfolded protein response (UPR), including  
35 translational activation of transcription factors ATF4, ATF5 and Chop. Polysome profiling of  
36 infected-cells revealed an accumulation of empty 80S ribosomes, consistent with increased  
37 phosphorylation of eIF2 $\alpha$  leading to translational shut-off via inhibited initiation. Ribosomal  
38 footprints on phosphorylated-eIF2 $\alpha$ -resistant mRNAs revealed unambiguous upstream open reading  
39 frame (uORF) occupancy consistent with host maintenance of the UPR. Unexpectedly, an inhibitor  
40 of PERK that blocks the UPR and relieves translation inhibition was found to attenuate virus  
41 growth suggesting that MHV may subvert the UPR to its own advantage. This study sheds new  
42 light on the complex interactions between MHV and host during infection and provides new  
43 potential targets for antiviral intervention.

44

45 **Introduction**

46 The *Coronaviridae* are a family of enveloped viruses with positive-sense, monopartite, single-  
47 stranded RNA genomes. At 27–32 kb, coronaviruses (CoVs) have the largest known RNA  
48 genomes. CoVs cause a broad range of diseases in animals and humans, ranging from the common  
49 cold to severe acute respiratory syndrome (SARS) [1]. Amongst CoVs of medical importance with  
50 high mortality rates and pandemic potential are SARS-CoV and MERS-CoV, both members of the

51 genus *Betacoronavirus*. Murine coronavirus, a betacoronavirus more commonly referred to as mouse  
52 hepatitis virus (MHV), has been used as a model to study the replication and biology of members of  
53 this genus.

54

55 Virus infection alters cellular gene expression to facilitate replication of the viral genome and the  
56 assembly of virus particles. As with all viruses, CoVs rely on the host cell translational machinery  
57 for viral protein synthesis. Many viruses have evolved mechanisms to shut off host mRNA  
58 translation, which can increase the availability of the translational machinery for non-canonical  
59 modes of viral protein synthesis, and at the same time inhibit host antiviral responses [2]. Exactly  
60 how CoVs induce host translational shut-off and its significance in relation to the synthesis of virus  
61 proteins, particularly at later times of infection, is still poorly understood. During CoV replication,  
62 the massive production and modification of viral proteins, as well as virion budding-related  
63 endoplasmic reticulum (ER) membrane depletion, can lead to overloading of the folding capacity of  
64 the ER and, consequently, ER stress [3]. This activates the unfolded protein response (UPR) which  
65 returns the cell to homeostasis and mitigates the major risks that protein misfolding poses for  
66 correct cellular function [4]. In mammalian cells, the UPR is controlled by three ER-resident  
67 transmembrane sensors: the inositol-requiring enzyme-1 (IRE1), the PKR-like ER kinase (PERK),  
68 and the activating transcription factor-6 (ATF6). These sensors recognise unfolded/misfolded  
69 proteins inside the ER and transmit a signal to the nucleus to transcribe specific genes whose  
70 products act to decrease protein synthesis and increase ER folding capacity [4]. Previous studies  
71 (reviewed in [5]) have aimed to establish how the different UPR pathways are involved during CoV  
72 infection.

73

74 Ribosome profiling (RiboSeq) allows global monitoring of cellular translation by mapping the  
75 positions of translating ribosomes on the transcriptome [6-8]. RiboSeq reveals the location and  
76 abundance of ribosomes on specific mRNA species with single-nucleotide precision. In conjunction

77 with RNASeq, to determine the corresponding transcriptome, RiboSeq has been used to elucidate  
78 changes in translation, transcription and translation efficiency in viral and host gene expression  
79 during the course of infection [9-19].

80

81 Here, we use RiboSeq and parallel RNASeq to analyse global changes in the host transcriptome and  
82 transcriptome throughout a time course of CoV infection. We observe activation of different  
83 pathways of the UPR leading to eIF2 $\alpha$  phosphorylation and translational shut-off at the level of  
84 initiation which we confirm by polysome profiling. Surprisingly, a pharmacological inhibitor of the  
85 UPR was found to mildly attenuate virus replication, suggesting that MHV may subvert the UPR to  
86 its own advantage. This detailed analysis of cellular translation during MHV infection provides new  
87 insights into the mechanism of CoV translational shut-off and the complex interactions between  
88 virus and host during infection, and may aid the identification of new targets for antiviral  
89 intervention.

90

## 91 **Results:**

92

### 93 **Effects of MHV-A59 infection on cellular gene expression**

94 To survey genome-wide changes in host translation and transcription during CoV-infection, murine  
95 17 clone 1 cells (17Cl-1) were infected with recombinant MHV-A59 at a multiplicity of infection  
96 (MOI) of 10. Two independent biological replicates of infected and mock-infected cells were  
97 harvested at 5 hours post-infection (h p.i.) and one replicate at 8 h p.i. Lysates were subjected to  
98 ribosome profiling and parallel RNASeq. In ribosome profiling, infected cell lysates are treated  
99 with RNase I and 28-32 nt long ribosome-protected fragments (RPFs) purified and processed for  
100 high-throughput sequencing. The resultant reads are mapped onto viral and host genomes, allowing  
101 the positions of translating ribosomes to be determined at sub-codon resolution. We found that a  
102 commonly-included additional step, in which cells are incubated with cycloheximide (CHX) before

103 lysis, caused stress-induced accumulation of ribosomes at the 5' end of coding regions (CDSs;  
104 [16]). In this work, therefore, cells were not pretreated with CHX and were snap-frozen before lysis,  
105 which avoids this artefact (Supplementary Figure 1, [20]).

106

107

## 108 **Effects of MHV-A59 infection on cellular transcription**

109 To assess the effects of MHV infection on cellular transcript abundance at 5 h p.i., differential  
110 expression analysis was performed on two biological replicates with DESeq2 [21]. Between  
111 infected and mock-infected conditions, genes with a fold change  $\geq 2$  and a false discovery rate  
112 (FDR)-corrected  $p$  value of  $\leq 0.05$  were considered to be significantly differentially transcribed (Fig  
113 1A, Supplementary Table 1). Some of the most differentially transcribed cellular genes (ochre  
114 points) are related to the host translational apparatus: *Rplp1* – a ribosomal protein from the large  
115 subunit; *Eef1a1* – eukaryotic elongation factor 1A-1; *Rps21* – a ribosomal protein from the small  
116 subunit; *Eif3f* – eukaryotic initiation factor 3 subunit F; *Eif3j1* – eukaryotic initiation factor 3  
117 subunit J; and *Eif2b3*. This is also reflected in the gene ontology (GO) term enrichment analysis  
118 (Fig 1B; full results in Supplementary Table 2), which reveals that all GO terms enriched in the list  
119 of genes significantly transcriptionally down-regulated in infection were related to protein synthesis  
120 (blue points).

121

122 Several transcription-related genes were found to be transcriptionally up-regulated, for example  
123 *Polr2a*, the gene coding for the largest subunit of RNA polymerase II (Fig 1A). GO terms related to  
124 transcription, for example “transcription by RNAPII” (GO:0006366), are also enriched in the up-  
125 regulated genes list. Many histones feature in the transcriptionally up-regulated gene list and, as  
126 such, many histone-related GO terms are enriched in this list (Fig. 1B). Significantly, the GO term  
127 “response to unfolded protein” (GO:0006986) is enriched 4.85-fold in the list of genes  
128 transcriptionally up-regulated during infection ( $p=0.046$ , FDR-adjusted  $p$ -value), with similar fold

129 changes observed for “response to topologically incorrect protein” (GO:0035966; 4.31-fold  
130 enrichment;  $p=0.046$ ) (Supplementary Table 2) and “response to endoplasmic reticulum stress”  
131 (GO:0034976; 3.8-fold enrichment;  $p=0.012$ ) (Fig 1B – note that these terms are clustered within  
132 the “response to unfolded protein” GO term). Accordingly, some of the most differentially  
133 expressed genes were involved in the UPR such as *Herpud1* – homocysteine inducible ER protein  
134 with ubiquitin like domain 1; *Bip* - immunoglobulin heavy chain-binding protein; *Chac1* –  
135 glutathione-specific gamma-glutamylcyclotransferase 1; *Chop* - a C/EBP family transcription factor  
136 involved in the ER stress response, and *Xbp1* - X-Box Binding Protein 1 (Fig 1A). As the  
137 replication cycle of CoVs is known to be intimately linked to the ER, and previous studies have  
138 used different techniques to infer information about how CoV infection affects different branches of  
139 the UPR, we decided to focus on this area.

140

141 To validate changes in the transcript abundance of these genes, total RNA was extracted from three  
142 biological replicates of MHV-infected and mock-infected cells at 5 h p.i. and the levels of selected  
143 up-regulated (Fig 1C, left panel) and down-regulated (Fig 1C, right panel) transcripts assessed by  
144 quantitative real-time PCR (qRT-PCR), normalised by a ‘housekeeping gene’, ribosomal protein  
145 L19 (*Rpl19*), which has been reported to be unaffected by ER stress [22,23]. Up-regulated  
146 transcripts had qRT-PCR values broadly consistent with the RNASeq measurements (Fig 1A and  
147 1C) whereas there was a little more variation in the down-regulated transcripts, which may be partly  
148 explained by the observation that *Rpl19* itself was slightly, though not statistically significantly,  
149 down-regulated ( $\log_2(\text{fold change}) = -0.34$ ,  $p=0.37$ ) (Fig 1A, yellow).

150

### 151 **Effects of MHV-A59 infection on cellular translation**

152 CoVs induce host translational shut-off [24-29] although the mechanisms are not completely  
153 understood. We reasoned that some host genes may be resistant to virus-induced shut-off and that  
154 identifying such genes might give new insights into the shut-off mechanism(s). To evaluate

155 differences at the level of translation as a result of MHV infection, we calculated relative translation  
156 efficiencies (TE) – defined herein as the ratio of ribosome-protected-fragment (RPF) and total RNA  
157 density in the CDS of a given gene – at 5 h p.i. using Xtail [30], applying the same fold change and  
158 *p*-value thresholds as for the transcription analysis. As shown in Fig 2A, several of the  
159 translationally up-regulated genes encode key proteins involved in activation of the UPR, for  
160 example ATF4 (activating transcription factor 4), ATF5 (activating transcription factor 5) and  
161 CHOP (DDIT3/GADD153) which are effector transcription factors [31-36]. GADD34  
162 (MYD116/PPP1R15A), a protein that acts as a negative regulator to diminish UPR activation if  
163 persistent for a long time [37,38], is also translationally up-regulated.

164

165 Phosphorylation of eukaryotic initiation factor (eIF) 2 $\alpha$  is a well-known mechanism for translational  
166 shut-off, and can also result from UPR activation, so we next investigated whether the mRNAs  
167 found to be preferentially translated during MHV infection were enriched for genes resistant to  
168 translational repression by phosphorylated eIF2 $\alpha$  (p-eIF2 $\alpha$ ). This is not an existing GO term but,  
169 using a pre-existing list of p-eIF2 $\alpha$  resistant genes published in Andreev *et al* [36] (Supplementary  
170 Table 2), an enrichment analysis compared to a background of all expressed genes demonstrated a  
171 9.15-fold enrichment of mRNAs annotated with this term with a *p*-value of  $1.42 \times 10^{-4}$  (Fisher  
172 Exact Test).

173

174 Resistance to the effects of p-eIF2 $\alpha$  has been linked to the presence of efficiently translated  
175 upstream open reading frames (uORFs) in the 5' UTR of these mRNAs, which allow ribosomes to  
176 undergo selective re-initiation of the main ORF under conditions of eIF2 $\alpha$  phosphorylation [31-  
177 36,39]. Our RiboSeq data were of sufficiently high resolution to determine reading frame and thus  
178 unambiguously assign ribosome occupancy to several uORFs on eIF2 $\alpha$ -resistant mRNAs (for  
179 example *Atf5*, *Gadd34*, *Slc35a4* in Supplementary Fig 2). Comparison of RPF distribution with  
180 RNASeq read distribution allows visualisation of the changes in TE. These results, consistent with

181 eIF2 $\alpha$  phosphorylation (leading to inhibited translation initiation), could indicate a major cause of  
182 host translational shut-off during MHV infection. This will be further explored below.

183

#### 184 **Comparison of transcriptional and translational changes during MHV-A59 infection**

185 A comparison of the effects of MHV infection on both transcription and translation of individual  
186 cellular mRNAs is shown in Figure 2 (panel B). In some cases, for example *Polr2a*, the up-  
187 regulation of transcription is accompanied by down-regulation of TE (or vice versa); this leads to a  
188 buffering effect that presumably results in relatively minor changes in protein levels. The top-centre  
189 section of Fig. 2B shows genes that are transcriptionally up-regulated without any significant  
190 change in TE (blue dots). Consistent with this, *Chac1*, *Herpud1*, *Bip* and *Xbp1* are induced  
191 transcriptionally by factors involved in UPR activation, but do not have increased TE as they are  
192 not resistant to eIF2 $\alpha$  phosphorylation [40-43]. *Atf4*, *Slc35a4* and *Atf5*, in the lower right hand  
193 quadrant of Fig 2B, are translationally resistant to p-eIF2 $\alpha$  but not transcriptionally induced by the  
194 activation of UPR [32-36]. *Gadd34* and *Chop*, in the upper right hand quadrant of Fig 2B, are both  
195 translationally resistant to p-eIF2 $\alpha$  and transcriptionally induced by ATF4 [35,39,44-45]. However,  
196 this transcriptional up-regulation is only statistically significant for *Chop*, setting it apart as a rare  
197 example of a gene that is both transcriptionally and translationally up-regulated in MHV infection.

198

#### 199 **MHV infection and activation of the unfolded protein response**

200 Although several studies [27, 46-48] have aimed to establish how each of the three UPR sensor  
201 pathways may be involved during CoV infection, we wanted to take advantage of the data that  
202 ribosome profiling provides to carry out a comprehensive analysis of specific arm of the UPR  
203 response during MHV infection. In the mouse gene ontology database, the GO categories for each  
204 of the three specific branches of the UPR activation, are too small for meaningful inclusion in the  
205 enrichment analysis, probably due to incomplete annotation of these pathways in *Mus musculus*. In  
206 order to analyse enrichment of UPR-related functions more thoroughly, lists of significantly



207 differentially expressed genes were mapped to human orthologues and used for Reactome pathway  
208 enrichment analysis [49]. In this analysis, UPR (R-HSA-381119) was the most significantly  
209 enriched pathway attributed to transcriptionally up-regulated genes, with the ATF6 branch (R-HSA-  
210 381183) second, and the other two branches (PERK-ATF4 and IRE1 $\alpha$ : R-HSA-380994 and R-  
211 HSA-381070) further down the list (Supplementary Table 3).

212

### 213 *Monitoring IRE1 $\alpha$ and ATF6*

214 ER stress induction activates endonuclease IRE1 $\alpha$  which cleaves X-box binding protein-1 (*Xbp-1*)  
215 mRNA [43,50]. Activated IRE1 $\alpha$  removes a 26-nt intron from unspliced *Xbp-1* (*Xbp-1u*) mRNA  
216 leading to a translational reading frame shift and a longer protein. The product of spliced *Xbp-1*  
217 mRNA (*XBP-1s*) is an active transcription factor that up-regulates the expression of ER-associated  
218 degradation (ERAD) components and ER chaperones. 17 Cl-1 cells were infected with MHV-A59  
219 or incubated with tunicamycin, a pharmacological inducer of ER stress which activates all UPR  
220 signalling pathways. Determination of *Xbp-1* splicing was done by reverse transcriptase PCR (RT-  
221 PCR) of total RNA extracted from 17 Cl-1 cells infected with MHV-A59 at 2.5, 5, 8 and 10 h p.i. or  
222 incubated with tunicamycin, using specific primers flanking the *Xbp-1* splice site (Fig 3A). At all  
223 timepoints, *Xbp-1u* was the predominant form in mock-infected cells whereas *Xbp-1s* was the major  
224 species in tunicamycin-treated cells. In virus-infected cells, *Xbp-1u* was predominant at 2.5 h p.i.  
225 but *Xbp-1s* became predominant at 5 h p.i.. An apparent reduction of RNA levels of *Xbp-1* and  
226 *Rpl19* can be seen at 8 and 10 h p.i. but this is likely due to the fact that RT reactions were carried  
227 out using a consistent amount of total RNA as starting material but, at these timepoints, viral RNA  
228 comprises approximately 80% of the total RNA in the cell [16]. In order to analyse translation of  
229 *Xbp-1u* and *Xbp-1s* in virus-infected cells, we inspected the ribosome profiling data (Fig 3B). For  
230 MHV-infected cells (MHV RiboSeq panels) and tunicamycin-treated cells (RiboSeq Tunicamycin  
231 panel), an increased number of reads mapped in the +2 reading frame (yellow peaks) corresponding  
232 to the *Xbp-1u* sequence, and downstream of the annotated main ORF stop codon (pink dashed line).

233 These reads result from translation of the *Xbp-1s* frameshifted isoform and indicate a dramatic  
234 increase in production of the active transcription factor.

235 Upon induction of ER stress, ATF6 translocates from the ER to the Golgi apparatus where it is  
236 cleaved by the proteases Site-1 (S1P) and Site-2 (S2P) [51]. After cleavage, the amino-terminus of  
237 ATF6, containing a basic leucine zipper (bZIP) transactivating domain, translocates to the nucleus  
238 to up-regulate the ER chaperone immunoglobulin heavy chain binding protein (BiP). 17 Cl-1 cells  
239 were infected with MHV-A59 or incubated with tunicamycin and analysed by Western blot for  
240 ATF6 cleavage upon ER stress induction (Supplementary Figure 3A upper panel). However, we  
241 were unable to detect any differences in the blots of mock-infected, MHV-infected or tunicamycin-  
242 treated cells. Therefore, to analyse this UPR branch, we monitored BiP, whose mRNA or protein  
243 levels serve as a proxy for activation of the ATF6 pathway (although its transcription can eventually  
244 be regulated by other UPR factors such as XBP-1 and CHOP) [27,52]. Cells were harvested at 2.5,  
245 5, 8 and 10 h p.i. and analysed by qRT-PCR in three biological replicates (plotted as the ratio of  
246 transcription of *BiP* to the house-keeping gene *Rpl19*: Fig 3C). An increase in *BiP* transcription  
247 compared to the house-keeping gene *Rpl19* was observed in tunicamycin-treated (purple) and  
248 MHV-infected cells (orange) from 2.5 to 8 h p.i. followed by a modest decline, whereas mock-  
249 infected cells (blue) showed no induction. Surprisingly, whereas Western blot analysis (Fig 3D)  
250 confirmed induction of BiP protein in tunicamycin-treated cells by 8 h p.i., no such induction was  
251 seen in MHV-infected cells. RNASeq and RiboSeq read counts of *BiP* at 5 and 8 h p.i. (Fig 2B and  
252 Supp Fig 3B), revealed an increase in RNASeq reads in MHV-infected cells (Supplementary Figure  
253 3B; Mock RNASeq compared to MHV RNASeq panels) consistent with the qRT-PCR results.  
254 Although an expected increase in RPFs was seen in infection (Supplementary Figure 3B; MHV  
255 RiboSeq panels), ribosome density was quite low in comparison to tunicamycin treated cells (6 h)  
256 (Supplementary Figure 3B; RiboSeq Tunicamycin panel) and perhaps beyond the detection limit of  
257 the immunoblots of Fig. 3D.

258

## 259 **Monitoring PERK-eIF2 $\alpha$ -ATF4 activity**

260 In response to ER stress, PERK oligomerises and auto-phosphorylates [53]. Activated PERK  
261 phosphorylates the  $\alpha$ -subunit of eukaryotic initiation factor 2 (eIF2 $\alpha$ ) which in turn impairs  
262 recycling of inactive eIF2-GDP to active eIF2-GTP resulting in a general shutdown of protein  
263 synthesis [54]. However, as previously described, translation of ATF4 is increased in this situation  
264 [31,32,55] leading to the induction of its target gene *Chop*. To monitor activation of this pathway,  
265 we analysed PERK, CHOP, ATF4 and p-eIF2 $\alpha$  expression by qRT-PCR and Western blotting. 17  
266 CI-1 cells were infected with MHV-A59 or incubated with tunicamycin for 2.5, 5, 8 and 10 h. As  
267 shown in Fig 4A, *Chop* mRNA levels (measured as the *Chop/RpL19* ratio) increased five-fold in  
268 tunicamycin-treated cells (purple) compared to mock-infected cells (blue), and were stable over the  
269 time course. In MHV-infected cells (orange), the ratio also increased from 2.5 to 8 h p.i. although  
270 not to the level seen in tunicamycin-treated cells. Protein expression was determined by  
271 immunoblotting using antibodies specific for MHV nucleocapsid protein (N), PERK, ATF4, p-  
272 eIF2 $\alpha$  and eIF2 $\alpha$ , with GAPDH and eIF2 $\alpha$  as loading controls (Fig 4B). PERK, ATF4, p-eIF2 $\alpha$  and  
273 eIF2 $\alpha$  were at all time points in both tunicamycin-treated and MHV-infected cells (from 5 h p.i.  
274 onwards). The multiple bands observed for PERK correspond to autophosphorylated species,  
275 indicative of the activation of this kinase upon ER stress. To rule out the possibility that eIF2 $\alpha$   
276 might also be phosphorylated as a response to protein kinase R (PKR) activation, we confirmed the  
277 absence of phosphorylated PKR in Western blots (Supplementary Figure 3A, lower panel).

278

279 Subsequently, we analysed profiles of RiboSeq and RNASeq reads mapping to ATF4 in virus-  
280 infected and tunicamycin-treated cells (Fig 4C). Consistent with previous studies [31,32],  
281 translation of the short (three codon) uORF1 (frame +2, yellow reads, nucleotides 399 to 407) was  
282 observed under all conditions. In mock-infected cells, uORF2 was efficiently translated (Mock  
283 RiboSeq panels; reads in yellow mapping to uORF2 indicated by a yellow rectangle, frame +2) thus  
284 diverting scanning preinitiation ribosomes from accessing the main ORF (pink rectangle) to which

285 very few RPFs mapped. In contrast, in MHV-infected cells (MHV RiboSeq panels), a substantial  
286 fraction of preinitiation ribosomes were able to scan past uORF2 to translate the main ORF, leading  
287 to a reduced density of ribosomes on uORF2 and a greatly increased number of RPFs mapping to  
288 the main ORF. Tunicamycin-treated cells showed an intermediate ribosome distribution, but again  
289 with efficient translation of the main ORF.

290

### 291 **Polysome profiling of 17 Cl-1 cells infected with MHV-A59**

292 Since total read counts are normalised by library size, ribosome profiling does not provide  
293 information on total global translation levels. To further investigate virus-induced inhibition of  
294 translation as a consequence of UPR activation and eIF2 $\alpha$  phosphorylation, analytical polysome  
295 profiling (Fig 5A) was performed for mock- and MHV-infected 17 Cl-1 cells. Cytoplasmic extracts  
296 were prepared in the presence of cycloheximide to retain intact monosomes and polysomes and  
297 analysed by sucrose density gradient centrifugation. This revealed an accumulation of monosomes  
298 (80S) in MHV-infected cells from 5 h p.i. onwards, consistent with inhibition of initiation. To  
299 investigate whether the 80S ribosomes accumulating during MHV infection contain mRNA (as an  
300 indicator of a translating ribosome), polysome profiling was repeated using a higher salt buffer (400  
301 mM KCl; Fig 5B): a condition in which 80S ribosomes lacking mRNA dissociate into constituent  
302 subunits. In mock-infected cells, a modest diminution of 80S levels was observed at 400 mM KCl  
303 (mock 5 h, compare Fig 5A panel 2, and Fig 5B left panel), but a much greater reduction in 80S was  
304 observed in MHV-infected cells (MHV 5 h p.i., compare Fig 5A panel 5 and Fig 5B right panel),  
305 indicating that the vast majority of 80S ribosomes accumulating at this time point are not mRNA-  
306 associated. These data support the view that MHV-infection leads to translational shut-off via  
307 inhibited initiation, consistent with the effects of eIF2 $\alpha$  phosphorylation.

308

### 309 **Effect of the PERK inhibitor GSK-2606414 on MHV replication**

310 GSK-2606414 (PERKi) is a potent and selective high affinity ligand of the PERK kinase, that  
311 interferes with kinase activity by competing for ATP [56,57]. In MHV-infected 17 Cl-1 cells at 5  
312 and 8 h p.i., the drug prevented autophosphorylation of PERK (Fig 6A, lower panel) and  
313 phosphorylation of the PERK substrate, eIF2 $\alpha$ , in a dose-dependent manner (Fig 6A, upper panel),  
314 effectively blocking this branch of the UPR. Pulse labelling of infected cells for one hour at 5 h p.i.  
315 revealed, as expected, that prevention of eIF2 $\alpha$  phosphorylation increased modestly both viral (Fig  
316 6A) and host protein synthesis (Fig 6B), without effect on mock-infected cells (Fig 6B). Also,  
317 analytical polysome profiling of MHV-infected cells treated with 5  $\mu$ M of the PERKi for 5 h (Fig  
318 6C) revealed a decrease in the accumulation of monosomes (80S) compared to MHV-infected cells  
319 at 5 h p.i. (Fig 5A, middle panel) showing a relief in translation inhibition. Despite the increased  
320 virus protein synthesis, 17 Cl-1 cell monolayers infected with MHV-A59 in the presence of the  
321 PERK inhibitor remarkably showed delayed formation of syncytia in comparison to untreated cells  
322 at 8 h p.i. (Fig 6D). The quantification of released virions through TCID<sub>50</sub> assays revealed an ~four-  
323 fold reduction in virus titre in cells incubated with PERKi compared to control cells (P= 0.0093; Fig  
324 6E, left panel) whereas there was no difference in the quantification of intra- and extracellular  
325 virions in treated *versus* non-treated cells (Fig 6E, right panel). These observations suggest that  
326 relieving inhibition of protein synthesis – affecting both cellular and viral proteins – is detrimental  
327 to virus production and the development of syncytia in virus-infected cells.

328

329 Furthermore, we investigated how PERKi was affecting the different pathways of the UPR as a  
330 response to MHV infection. We monitored *BiP* at 5 h p.i. with different PERKi concentrations by  
331 qRT-PCR in three biological replicates. The ratio of *BiP* transcription to the house-keeping gene  
332 *Rpl19* was only slightly increased at the highest PERKi concentrations (Fig 6F, upper panel).  
333 Determination of *Xbp-1* splicing was carried out as earlier in MHV-infected cells at 5 h p.i. and  
334 treated with different PERKi concentration. *Xbp-1u* was the predominant form in mock-infected  
335 cells whereas *Xbp-1s* was the major species in MHV-infected cells in all cases (Fig 6F, lower

336 panel). These data indicate that the PERKi was very specific in inhibiting the PERK-eIF2 $\alpha$  activity  
337 but not the other branches of the UPR.

338

### 339 **Discussion:**

340

341 We have used ribosome profiling and parallel RNASeq to investigate changes in the cellular  
342 translome and transcriptome in response to infection with MHV, a representative of the  
343 *Betacoronavirus* genus of the *Coronaviridae* family. These studies provide the highest resolution  
344 data to date on the translome of cells during coronavirus-induced stress.

345

346 RNASeq libraries revealed that some of the most significantly up-regulated cellular transcripts in  
347 virus-infected cells were part of the UPR (*Herpud1* and *Chac1*) and changes in the translation  
348 efficiency of cellular proteins were consistent with uORF-regulated responses to eIF2 $\alpha$   
349 phosphorylation, including those previously implicated as effectors of the UPR such as *Atf4*, *Atf5*,  
350 *Chop* and *Gadd34* [31-36,39]. These data confirm again that there is a close interplay between virus  
351 infection and the UPR, with the host activating the UPR to combat the effects of virus infection, and  
352 viruses sometimes manipulating the UPR to promote replication and pathogenesis [58-61]. The  
353 intimate association of CoVs with the ER during replication results in ER stress responses as the  
354 cell attempts to return to homeostasis [47, 62-66; reviewed in [67]).

355

356 The relative modulation of UPR branches differs between different CoVs [3,5,67]. For example,  
357 SARS-CoV infection does not lead to *Xbp-1* splicing [47] whereas the IRE1 pathway is activated by  
358 infectious bronchitis virus or MHV infection or by MHV S protein overexpression [27,68]. In spite  
359 of the observed *Xbp-1* mRNA splicing during MHV infection [27], Xbp-1s protein had not  
360 previously been detected in coronavirus-infected cells. In our study (5 and 8 h p.i. data sets), an

361 increased number of RPF reads mapped in the +2 reading frame of the *Xbp-1u* transcript  
362 corresponding to translation of the *Xbp-1s* frameshifted isoform.

363

364 Activation of the ATF6 pathway by CoV infection has not yet been fully addressed. ATF6 cleavage  
365 into its active form is observed during MHV infection but is significantly reduced at late time points  
366 [27] although we could not detect the cleavage of this transcription factor by western blotting. In  
367 addition, the trimmed ATF6 form is not detected in SARS-CoV infected cells [69]. Furthermore,  
368 ER stress-responsive promoters exhibit little activity under these conditions. In the present study, an  
369 induction of *BiP* transcription due to ATF6 activation was observed to a similar extent in both  
370 tunicamycin-treated and MHV-infected cells, whereas BiP protein expression was only detected by  
371 western blotting in tunicamycin-treated cells. Ribosome profiling data revealed that, in virus-  
372 infected cells, the level of RPFs corresponding to the *BiP* CDS was not as high as in tunicamycin-  
373 treated cells and this was probably the reason why this protein was not detected by western blot  
374 analysis, although we can not rule out that BiP protein can be degraded as a response to MHV-  
375 infection at a post-translational stage.

376

377 With respect to UPR-related inhibition mediated by eIF2 $\alpha$  phosphorylation, it has been shown that  
378 infectious bronchitis virus activates or suppresses protein kinase RNA-activated (PKR) and PERK  
379 during the course of an infection [70] whereas transmissible gastroenteritis virus protein 7 emulates  
380 the function of DNA damage-inducible protein 34 (GADD34) to dephosphorylate eIF2 $\alpha$  [71]. Our  
381 study reveals that MHV-A59 infection increases the level of p-eIF2 $\alpha$  and ATF4 from 5 h p.i.  
382 onwards. The RiboSeq data also revealed decreased translation of the *Atf4* uORF2 at 5 and 8 h p.i.  
383 and a concomitant increase in translation of the main ORF. Although Bechill and colleagues [27]  
384 failed to detect the products of ATF4 target genes, *Gadd34* and *Chop*, during MHV infection by  
385 western blotting, we found evidence supporting an increase in translation of *Gadd34* and both  
386 transcription and translation of *Chop* at later time points p.i.



387

388 We tested the effect of the selective PERK inhibitor GSK-2606414 on MHV replication [56,57].  
389 GSK-2606414 ( $IC_{50} = 0.4$  nM) exhibits >1000-fold selectivity for PERK over heme-regulated  
390 eIF2 $\alpha$  (HR1) and PKR. Up to 5  $\mu$ M of this inhibitor was well tolerated by 17 Cl-1 cells and, in  
391 MHV-infected cells, the prevention of eIF2 $\alpha$  phosphorylation alleviated the inhibition in translation  
392 of cellular and viral proteins as expected. Surprisingly, the higher content of viral proteins did not  
393 lead to a more prominent cytopathic effect but instead delayed syncytia formation and reduced viral  
394 titre. Therefore, we conclude that UPR-mediated eIF2 $\alpha$  phosphorylation may be favourable to  
395 MHV replication – perhaps by preventing translation of various anti-viral factors – and the  
396 pharmacological manipulation of this UPR branch can be explored as a potential target for antiviral  
397 intervention. Also, it will be interesting to investigate a potential additional role of this PERK  
398 inhibitor in the translocation of the spike (S) protein and in the regulation of the assembly of MHV-  
399 A59 particles.

400

401 Ribosome profiling provides information on initiating and elongating 80S ribosomes but (without  
402 modification) it does not report on free monosomes nor small subunits at early stages in initiation  
403 prior to formation of 80S complexes. Analytical polysome profiling showed an accumulation of  
404 80S monosomes in MHV-infected cells from 5 h p.i. with the vast majority not being associated  
405 with mRNA which is a typical outcome of impaired translation [72]. This suggests that protein  
406 translation was inhibited at the stage of initiation probably due to the activation of the PERK branch  
407 in response to ER stress and the concomitant phosphorylation of eIF2 $\alpha$  which can be alleviated by  
408 treating MHV infected cells with a specific PERK inhibitor. Phosphorylated eIF2 $\alpha$  (p-eIF2 $\alpha$ )  
409 forms a stable complex with eIF2B – the guanine exchange factor responsible for recycling inactive  
410 eIF2-GDP to eIF2-GTP – which rapidly reduces the pool of available eIF2B. This prevents  
411 recycling of the ternary complex of eIF2, GTP and Met-tRNA<sub>i</sub> and formation of the 43S pre-



412 initiation complex, and thus leads to a general shutdown of protein synthesis by inhibition of  
413 initiation [73].

414

415 Viruses commonly employ translational shutoff mechanisms to facilitate viral replication. On the  
416 one hand, shut-off of host cell translation can redirect the translation machinery towards viral gene  
417 expression if the virus has evolved non-canonical modes of translation, such as internal ribosome  
418 entry site (IRES) mediated initiation. On the other hand, the shut-off of host cell protein synthesis  
419 will inhibit a range of cellular anti-viral responses. Previous studies have shown that MHV can  
420 induce host translational shutoff and mRNA decay in LR7 cells with the concomitant formation of  
421 stress granules and processing bodies [26]. Furthermore, a number of reports have demonstrated  
422 that CoV nsp1, the most N-terminal product of the replicase polyprotein, modulates host protein  
423 synthesis. In different CoVs, nsp1 has been shown to associate with the 40S ribosomal subunit thus  
424 preventing viral and cellular mRNA translation; induce cellular mRNA degradation via an  
425 endonucleolytic mRNA cleavage in the 5' region of capped mRNA; and selectively target nuclear  
426 host mRNAs and transport them to the cytoplasm for degradation [28-29,74-75]. The involvement  
427 of nsp1 in host protein translation could not be ruled out in this study without a comparison with a  
428 mutant virus lacking nsp1. However, the UPR-related translational modulation and the CoV nsp1-  
429 related modification of translation (and mRNA degradation) testify to the complexity of cellular  
430 translational shutoff mechanisms utilised by CoVs. How MHV proteins can be synthesised in a  
431 state of global translation inhibition has been the subject of previous speculation. Viral mRNAs  
432 contain a common 5'-leader sequence (65–90 nucleotides long) that could bind to the nucleocapsid  
433 (N) protein to form a complex that might act as a strong translation initiation signal [76], or the  
434 leader RNA sequence may bind to nsp1, protecting the viral mRNAs from nsp1-induced RNA  
435 cleavage [75,77]. However, we found previously that virus mRNAs 2–7 were translated with  
436 generally similar efficiencies during infection and, importantly, were not preferentially translated

437 relative to host mRNAs. Thus we concluded that the synthesis of large quantities of virus proteins,  
438 especially N, was achieved mainly through high levels of transcription [16].

439

440 In conclusion, this study provides a survey of coronavirus effects on the cellular transcriptome and  
441 translome, complementing previous investigations on the UPR and host cell shutoff during MHV  
442 infection. The results of our analyses will help inform further investigations on host-CoV  
443 interactions and several differentially expressed genes identified may help identify new targets for  
444 antiviral intervention.

445

446

447 **Materials and Methods:**

448

449 **Cells and virus:** Murine 17 clone 1 (17 Cl-1) ([82], a kind gift of Dr Stanley Sawicki, University of  
450 Toledo) cells were maintained in Dulbecco's modification of Eagle's medium supplemented with  
451 10% (vol/vol) fetal calf serum (FCS). Recombinant MHV strain A59 (MHV-A59) was derived as  
452 previously described ([78], a kind gift of Dr Stanley Sawicki, University of Toledo, ATCC VR764).  
453 Upon reaching 70–80% confluence, 17 Cl-1 cells were infected with MHV-A59 at MOI 10 in  
454 infection medium [Hank's balanced salt solution (HBSS) containing 50 µg/ml DEAE-dextran and  
455 0.2% bovine serum albumin (BSA)]. After 45 min at 37 °C, the inoculum was removed and the cells  
456 were incubated in DMEM containing 10% FCS, 100 U/ml penicillin and 100 µg/ml streptomycin at  
457 37 °C until harvest.

458 For the tunicamycin experiments, 17 Cl-1 cells were incubated in the presence of tunicamycin (2  
459 µg/ml). 17 Cl-1 mock and MHV-infected cells were treated with different concentrations (1–5 µM)  
460 of the PERK-inhibitor GSK-2606414 (PERKi), a kind gift of Dr Edward Emmott and Prof Ian  
461 Goodfellow. PERKi was added to the cells just after the adsorption time and maintained until cells  
462 were harvested.

463

464 **Ribosomal profiling and RNASeq data:** 17 Cl-1 cells were grown on 100-mm dishes to 90%  
465 confluency and infected with MHV-A59 at a multiplicity of infection (MOI) of 10. At indicated h  
466 p.i., cells were rinsed with 5 ml of ice-cold PBS, flash frozen in a dry ice/ethanol bath and lysed  
467 with 400 µl of lysis buffer [20 mM Tris-HCl pH 7.5, 150 mM NaCl, 5 mM MgCl<sub>2</sub>, 1 mM DTT, 1%  
468 Triton X-100, 100 µg/ml cycloheximide and 25 U/ml TURBO DNase (Life Technologies)]. For the  
469 tunicamycin experiments, 17 Cl-1 cells were incubated in the presence of tunicamycin (2 µg/ml)  
470 and, after 6 h, cells were rinsed with 5 ml of ice-cold PBS and then flash frozen. The cells were  
471 scraped extensively to ensure lysis, collected and triturated ten times with a 26-G needle. Cell  
472 lysates were clarified by centrifugation at 13,000 g for 20 min at 4°C. Lysates were subjected to  
473 Ribo-Seq and RNA-Seq based on previously reported protocols [16,79]. Ribosomal RNA was

474 removed using Ribo-Zero Gold rRNA removal kit (Illumina) and library amplicons were  
475 constructed using a small RNA cloning strategy adapted to Illumina smallRNA v2 to allow  
476 multiplexing. Amplicon libraries were deep sequenced using an Illumina NextSeq500 platform.  
477 Due to the very large amounts of vRNA produced during infection, mock samples were processed  
478 separately from infected samples to avoid contamination. Ribo-Seq and RNA-Seq sequencing data  
479 have been deposited in ArrayExpress (<http://www.ebi.ac.uk/arrayexpress>) under the accession  
480 numbers E-MTAB-5391 and E-MTAB-6278.

481

482 **Computational analysis of RiboSeq and RNASeq data:** Reads were trimmed for adaptor  
483 sequences, filtered for length  $\geq 25$  nt, and reads mapping to *Mus musculus* rRNA (downloaded from  
484 SILVA database) or MHV-A59 viral RNA (AY700211.1) (with up to 2 mismatches) removed, as  
485 previously described [16]. The remaining reads were aligned directly to the mouse genome (FASTA  
486 and GTF gencode release M20, GRCm38, primary assembly) (with up to 2 mismatches) using  
487 STAR (parameters: `--outFilterIntronMotifs RemoveNoncanonicalUnannotated --`  
488 `outMultimapperOrder Random`) [80]. Reads on protein-coding genes were tabulated using htseq-  
489 count (version 0.9.1), covering the whole gene for differential transcription analysis (parameters: `-a`  
490 `0 -m union -s yes -t gene`) and just the CDS for the translation efficiency analysis (parameters:  
491 `htseq-count -a 0 -m intersection-strict -s yes -t CDS`), using the GTF file from the above gencode  
492 release as the gene feature annotation [81]. Thus the differential TE analysis excludes reads  
493 mapping to uORFs or non-annotated coding sequences (unless such sequences overlap the main  
494 annotated ORF).

495

496 Differential transcription analysis was performed using DESeq2 (version 1.18.1) [21] and  
497 translation efficiency analysis with Xtail (version 1.1.5) [29]. For each analysis, low count genes  
498 (with fewer than ten counts from all samples combined) were discarded, following which read  
499 counts were normalised by the total number of reads mapping to host mRNA for that library. This

500 means the very large amount of vRNA present in infected samples should not affect the analyses.  
501 Shrinkage of the transcriptional fold changes to reduce noise in lowly-expressed genes was applied  
502 using lfcShrink (parameter: type='normal').

503

504 A given gene was considered to be differentially expressed if the FDR was less than 0.05 and the  
505 fold change between the averages of infected and mock replicates was greater than two. Volcano  
506 plots and transcription vs TE comparison plots were generated using standard R plotting features  
507 and FDR and  $\log_2$ (fold change) values from the DESeq2 and Xtail analyses. All reported  $p$  values  
508 are corrected for multiple testing, though it's important to note the fold changes plotted in the  
509 transcription vs TE comparison are not filtered for significant  $p$  values before plotting.

510

511 To make the plots of RNASeq and RPF profiles for specific transcripts, reads were mapped to the  
512 specified transcript from the NCBI genome assembly using bowtie [82] allowing two mismatches  
513 (parameters: -v 2, --best). Coordinates for known uORFs were taken from the literature and the  
514 positions of start and stop codons in all frames determined. Read density (normalised by total reads  
515 mapping to host mRNA for each library, to give reads per million mapped reads) was calculated at  
516 each nucleotide on the transcript and plotted, according to phase. Read positions were offset by +12  
517 nt so that plotted data represent the position of the ribosomal P site. Bar widths were increased to  
518 4nt to aid visibility and were plotted on top of each other starting from the 5' end of the transcript.

519

520 **Gene ontology and Reactome pathway enrichment analyses:** Lists of gene IDs of significantly  
521 differentially expressed genes (Supplementary Table 1) were used for GO term enrichment analysis  
522 by the PANTHER web server under the default conditions (release 20190606, GO database released  
523 2019-02-02) [83], against a background list of all the genes that passed the threshold for inclusion  
524 in that expression analysis. For Reactome pathway enrichment (version 69) [49], the same

525 differentially expressed gene lists were converted to their human orthologues and analysed using  
526 the reactome.org web server to determine which pathways are significantly over-represented.

527

528 **Enrichment analysis for eIF2 $\alpha$ -phosphorylation-resistant genes:**

529 A list of genes reported resistant to translational repression by p-eIF2 $\alpha$  was constructed based on  
530 Andreev et al., 2015 [36] and references within (excluding those from IRESite, which were not  
531 found eIF2 $\alpha$ -resistant in their study). Mouse homologues of these genes were identified using NCBI  
532 homogene database. Enrichment of genes in this pathway amongst the genes with significantly  
533 increased translational efficiency, compared to a background of all *Mus musculus* genes included in  
534 the TE analysis with any GO annotation, was calculated using a Fisher Exact test.

535

536 **Quantitative real-time PCR assays:** Total RNA was isolated as described previously [79] for  
537 RNA-Seq analysis, and cDNA was synthesised from 1  $\mu$ g total RNA. Transcript levels were  
538 determined by quantitative real-time PCR using a Rotor-Gene 3000 (Corbett Research). Reactions  
539 were performed in a final volume of 20  $\mu$ l containing Hot Start Taq (1 U; QIAGEN), 3.5 mM  
540 MgCl<sub>2</sub>, 2.5 mM deoxynucleotides, SYBR Green dye, 500 nM forward and reverse specific primers  
541 and 1  $\mu$ l of cDNA. After enzyme activation (95 °C, 15 min), amplification was carried out in a  
542 three-step PCR procedure (50 cycles: 15 s at 95 °C for denaturation, 20 s at 55 °C for annealing and  
543 20 s at 72 °C for extension). Non-template controls were included for each primer pair, and each  
544 PCR reaction was carried out in triplicate.

545

546 **Immunoblotting:** Proteins were separated by 10% or 12% SDS-PAGE and transferred to  
547 nitrocellulose membranes. These were blocked (5% non-fat milk powder in PBST [137 mM NaCl,  
548 2.7 mM KCl, 10 mM Na<sub>2</sub>HPO<sub>4</sub>, 1.5 mM KH<sub>2</sub>PO<sub>4</sub>, pH 6.7, and 0.1% Tween 20]) and probed with  
549 mouse monoclonal antibodies raised against N (1:1,000), S (1:500) - kind gifts of Dr Helmut Wege,  
550 University of Würzburg -, GAPDH (G8795, Sigma-Aldrich, 1:20,000), S6 (1:500, Cell Signaling);

551 rabbit monoclonal antibodies against BiP (1:1,000, Abcam) and RPL10a (1:500, Abcam); or  
552 polyclonal rabbit anti-ATF4 (1:500, Proteintech), anti-eIF2 $\alpha$ , anti-p(Ser-51)-eIF2 $\alpha$  (1:1,000, Cell  
553 Signaling) and anti-PERK (1:1000, Abcam). Membranes were incubated in the dark with an IRDye-  
554 conjugated secondary antibody in phosphate-buffered saline (PBS) and 0.1% Tween 20 [IRDye  
555 800CW Donkey Anti-Mouse IgG (H+L), IRDye 800CW Donkey Anti-Rabbit IgG (H+L), IRDye  
556 680RD Goat Anti-Mouse IgG (H+L) and IRDye 680RD Goat Anti-Mouse IgM ( $\mu$  chain specific)].  
557 Blots were scanned using an Odyssey Infrared Imaging System (Licor).

558

559 **Polysome profiling:** 17 Cl-1 cells were infected as previously described. Ten minutes prior to  
560 harvesting, cells were treated with cycloheximide (100  $\mu$ g/ml), washed with PBS and lysed in a  
561 buffer containing 20 mM Tris HCl pH 7.5, 100 mM KCl, 5 mM MgOAc, 0.375 mM CHX, 1 mM  
562 DTT, 0.1 mM PMSF, 2U/ $\mu$ l DNase I, 0.5% NP-40, supplemented with protease and phosphatase  
563 inhibitors (ThermoFisher Scientific). Following trituration with a 26-G needle (ten passes), lysates  
564 were cleared (13,000 g at 4  $^{\circ}$ C for 20 min) and the supernatants layered onto 12 mL sucrose density  
565 gradients (10–50% sucrose in TMK buffer – 20 mM Tris-HCl pH 7.5, 100 mM KCl, 5 mM MgCl<sub>2</sub>)  
566 prepared in Beckman SW41 polypropylene tubes using a Gradient Master (Biocomp). Following  
567 centrifugation (200,000 g for 90 min at 4  $^{\circ}$ C), fractions were prepared using an ISCO fractionator  
568 monitoring absorbance at 254 nm. Proteins were concentrated from fractions using methanol-  
569 chloroform extraction [84] and subjected to immunoblotting analysis. Polysome profiling in higher  
570 salt conditions was carried out as described above except that the lysis buffer and sucrose density  
571 gradient contained 400 mM KCl.

572

573 **Metabolic labelling:** 17 Cl-1 cell monolayers were infected with MHV A-59 at a MOI of 10  
574 PFU/cell. At 5 h p.i., cells were washed twice with PBS and labelled for 1 h in methionine-free  
575 DMEM supplemented with 125  $\mu$ Ci/ml [<sup>35</sup>S] methionine. After this period, cells were harvested,  
576 washed twice with PBS and resuspended in lysis buffer (50 mM Tris pH 7.5, 100 mM NaCl, 5 mM

577 EDTA, 0.5% NP40). Cell lysate aliquots were mixed with Laemmli's sample buffer to a final  
578 concentration of 1× and subjected to 10% SDS-PAGE followed by autoradiography.

579

580 **TCID<sub>50</sub> assays:** Virus replication was assessed using a 50% tissue culture infective dose (TCID<sub>50</sub>)  
581 assay. One day prior to infection, 17 CI-1 cells were seeded in 96-well plates at  $4 \times 10^3$  cells/well in  
582 a final volume of 100 μl/well. Supernatant derived from extracellular media (released virions) or  
583 from extracellular media and cells subjected to a cycle of freezing/thawing (intra- and extracellular  
584 virions) was harvested at 6 h p.i. from a six-well plate infected with MHV-A59 in the presence or  
585 absence of PERKi, and serially diluted 10-fold in infection medium. At 18 h p.i., cells were washed  
586 with PBS, fixed with formal saline and stained with 0.1% toluidine blue. Wells showing any sign of  
587 cytopathic effect (CPE) were scored as positive. Experiments were conducted using triplicate  
588 biological repeats, each diluted in parallel and used to infect eight rows of wells. For each biological  
589 repeat, the 50% endpoint titre was calculated according to the method of Reed and Muench [85].

590

591



592 **References:**

- 593 1. Channappanavar R, Perlman S (2017) Pathogenic human coronavirus infections: causes and  
594 consequences of cytokine storm and immunopathology. *Semin Immunopathol.* doi:  
595 10.1007/s00281-017-0629-x.  
596
- 597 2. Walsh D, Mathews MB, Mohr I (2013) Tinkering with translation: protein synthesis in virus-  
598 infected cells. *Cold Spring Harb Perspect Biol* 5:a012351.  
599
- 600 3. Fung TS, Liu DX (2014) Coronavirus infection, ER stress, apoptosis and innate immunity. *Front*  
601 *Microbiol* 5: 296.  
602
- 603 4. Ron D, Walter P (2007) Signal integration in the endoplasmic reticulum unfolded protein  
604 response. *Nat Rev Mol Cell Biol* 8: 519-529.  
605
- 606 5. Fung TS, Liao Y, Liu DX (2016) Regulation of stress responses and translational control by  
607 coronavirus. *Viruses* 8: E184.  
608
- 609 6. Ingolia NT, Ghaemmaghami S, Newman JR, Weissman JS (2009) Genome-wide analysis in vivo  
610 of translation with nucleotide resolution using ribosome profiling. *Science* 324: 218-223.  
611
- 612 7. Ingolia NT, Lareau LF, Weissman JS (2011) Ribosome profiling of mouse embryonic stem cells  
613 reveals the complexity and dynamics of mammalian proteomes. *Cell* 147: 789-802.  
614
- 615 8. Ingolia NT (2014) Ribosome profiling: new views of translation, from single codons to genome  
616 scale. *Nat Rev Genet* 15: 205-213.  
617
- 618 9. Stern-Ginossar N, Weisburd B, Michalski A, Le VT, Hein MY, Huang SX, Ma M, Shen B, Qian  
619 SB, Hengel H, et al (2012) Decoding human cytomegalovirus. *Science* 338: 1088-1093.  
620
- 621 10. Liu X, Jiang H, Gu Z, Roberts, JW (2013) High-resolution view of bacteriophage lambda gene  
622 expression by ribosome profiling. *Proc Natl Acad Sci U S A* 110: 11928-11933.  
623
- 624 11. Arias C, Weisburd B, Stern-Ginossar N, Mercier A, Madrid AS, Bellare P, Holdorf M,  
625 Weissman JS, Ganem D (2014) KSHV 2.0: a comprehensive annotation of the Kaposi's sarcoma-  
626 associated herpesvirus genome using next-generation sequencing reveals novel genomic and  
627 functional features. *PLoS Pathog* 10: e1003847.  
628
- 629 12. Rutkowski AJ, Erhard F, L'Hernault A, Bonfert T, Schilhabel M, Crump C, Rosenstiel P,  
630 Efstathiou S, Zimmer R, Friedel CC, et al (2015) Widespread disruption of host transcription  
631 termination in HSV-1 infection. *Nat Commun* 6: 7126.  
632
- 633 13. Tirosh O, Cohen Y, Shitrit A, Shani O, Le-Trilling VT, Trilling M, Friedlander G, Tanenbaum  
634 M, Stern-Ginossar N (2015) The transcription and translation landscapes during human  
635 cytomegalovirus infection reveal novel host-pathogen interactions. *PLoS Pathog* 11: e1005288.  
636
- 637 14. Yang Z, Cao S, Martens CA, Porcella SF, Xie Z, Ma M, Shen B, Moss B (2015) Deciphering  
638 poxvirus gene expression by RNA sequencing and ribosome profiling. *J Virol* 89: 6874-6886.  
639
- 640 15. Bercovich-Kinori A, Tai J, Gelbart IA, Shitrit A, Ben-Moshe S, Drori Y, Itzkovitz S,  
641 Mandelboim M, Stern-Ginossar N (2016) A systematic view on influenza induced host shutoff.  
642 *Elife* 5: e18311.

- 643  
644 16. Irigoyen N, Firth AE, Jones JD, Chung BY, Siddell SG, Brierley I (2016) High-resolution  
645 analysis of coronavirus gene expression by RNA sequencing and ribosome profiling. *PLoS Pathog*  
646 12: e1005473.  
647  
648 17. Dai A, Cao S, Dhungel P, Luan Y, Liu Y, Xie Z, Yang Z (2017) Ribosome profiling reveals  
649 translational upregulation of cellular oxidative phosphorylation mRNAs during vaccinia virus-  
650 induced host shutoff. *J Virol* 91: e01858.16.  
651  
652 18. Irigoyen N, Dinan AM, Brierley I, Firth AE (2018) Ribosome profiling of the retrovirus murine  
653 leukemia virus. *Retrovirology* 15: 10.  
654  
655 19. Reid DW, Campos RK, Child JR, Zheng T, Chan KWK, Bradrick SS, Vasudevan SG, Garcia-  
656 Blanco MA, Nicchitta CV (2018) Dengue virus selectively annexes endoplasmic reticulum-  
657 associated translation machinery as a strategy for co-opting host cell protein synthesis. *J Virol*  
658 92:e01766-17.  
659  
660 20. Gerashchenko MV, Gladyshev VN (2014) Translation inhibitors cause abnormalities in  
661 ribosome profiling experiments. *Nucleic Acids Res* 42(17):e134.  
662  
663 21. Love MI, Huber W, Anders S (2014) Moderated estimation of fold change and dispersion for  
664 RNA-seq data with DESeq2. *Genome Biol* 15(12):550.  
665  
666 22. Hollien J, Weissman JS (2006) Decay of endoplasmic reticulum-localized mRNAs during the  
667 unfolded protein response. *Science* 313: 104-107.  
668  
669 23. Hiramatsu N, Joseph VT, Lin JH (2011) Monitoring and manipulating mammalian unfolded  
670 protein response. *Methods Enzymol* 491: 183-198.  
671  
672 24. Siddell SG, Wege H, Barthel, A, ter Meulen V (1980) Coronavirus JHM: cell-free synthesis of  
673 structural protein p60. *J Virol* 33: 10-17.  
674  
675 25. Hilton A, Mizzen L, MacIntyre G, Cheley S, Anderson R (1986) Translational control in murine  
676 hepatitis virus infection. *J Gen Virol* 67: 923-932.  
677  
678 26. Raaben M, Groot Koerkamp MJ, Rottier PJ, de Haan CA (2007) Mouse hepatitis coronavirus  
679 replication induces host translational shutoff and mRNA decay, with concomitant formation of  
680 stress granules and processing bodies. *Cell Microbiol* 9: 2218-2229.  
681  
682 27. Bechill J, Chen Z, Brewer JW, Baker SC (2008) Coronavirus infection modulates the unfolded  
683 protein response and mediates sustained translational repression. *J Virol* 82: 4492-4501.  
684  
685 28. Kamitani W, Huang C, Narayanan K, Lokugamage KG, Makino S (2009) A two-pronged  
686 strategy to suppress host protein synthesis by SARS coronavirus Nsp1. *Nat Struct Mol Biol* 16:  
687 1134-1140.  
688  
689 29. Lokugamage KG, Narayanan K, Nakagawa K, Terasaki K, Ramirez SI, Tseng CT, Makino S  
690 (2015) Middle east respiratory syndrome coronavirus nsp1 inhibits host gene expression by  
691 selectively targeting mRNAs transcribed in the nucleus while sparing mRNAs of cytoplasmic  
692 origin. *J Virol* 89: 10970-10981.  
693

- 694 30. Xiao Z, Zou Q, Liu Y, Yang X (2016) Genome-wide assessment of differential translations with  
695 ribosome profiling data. *Nat Commun* 7: 11194.  
696
- 697 31. Lu PD, Harding HP, Ron D (2004) Translation reinitiation at alternative open reading frames  
698 regulates gene expression in an integrated stress response. *J Cell Biol* 167: 27-33.  
699
- 700 32. Vattem KM, Wek RC (2004) Reinitiation involving upstream ORFs regulates ATF4 mRNA  
701 translation in mammalian cells. *Proc Natl Acad Sci U S A* 101: 11269-11274.  
702
- 703 33. Watatani Y, Ichikawa K, Nakanishi N, Fujimoto M, Takeda H, Kimura N, Hirose H, Takahashi  
704 S, Takahashi Y (2008) Stress-induced translation of ATF5 mRNA is regulated by the 5'-  
705 untranslated region. *J Biol Chem* 283: 2543-2553.  
706
- 707 34. Zhou D, Palam LR, Jiang L, Narasimhan J, Staschke KA, Wek RC (2008) Phosphorylation of  
708 eIF2 directs ATF5 translational control in response to diverse stress conditions. *J Biol Chem* 283:  
709 7064-7073.  
710
- 711 35. Palam LR, Baird TD, Wek RC (2011) Phosphorylation of eIF2 facilitates ribosomal bypass of  
712 an inhibitory upstream ORF to enhance CHOP translation. *J Biol Chem* 286: 10939-10949.  
713
- 714 36. Andreev DE, O'Connor PB, Fahey C, Kenny EM, Terenin IM, Dmitriev SE, Cormican P,  
715 Morris DW, Shatsky IN, Baranov PV (2015) Translation of 5' leaders is pervasive in genes resistant  
716 to eIF2 repression. *Elife* 4: e03971.  
717
- 718 37. Brush MH, Weiser DC, Shenolikar S (2003) Growth arrest and DNA damage-inducible protein  
719 GADD34 targets protein phosphatase 1 alpha to the endoplasmic reticulum and promotes  
720 dephosphorylation of the alpha subunit of eukaryotic translation initiation factor 2. *Mol Cell Biol*  
721 23(4):1292-303.  
722
- 723 38. Novoa I, Zeng H, Harding HP, Ron D (2001) Feedback inhibition of the unfolded protein  
724 response by GADD34-mediated dephosphorylation of eIF2alpha. *J Cell Biol* 28;153(5):1011-22.  
725
- 726 39. Lee YY, Cevallos RC, Jan E (2009) An upstream open reading frame regulates translation of  
727 GADD34 during cellular stresses that induce eIF2alpha phosphorylation. *J Biol Chem*  
728 284(11):6661-73.  
729
- 730 40. Mungrue IN, Pagnon J, Khannim O, Gargalovic PS, Lulis AJ (2009) CHAC1/MGC4504 is a  
731 novel proapoptotic component of the unfolded protein response, downstream of the ATF4-ATF3-  
732 CHOP cascade. *J Immunol* 1;182(1):466-76.  
733
- 734 41. Yamamoto K, Yoshida H, Kokame K, Kaufman RJ, Mori K (2004) Differential contributions of  
735 ATF6 and XBP1 to the activation of endoplasmic reticulum stress-responsive cis-acting elements  
736 ERSE, UPRE and ERSE-II. *J Biochem* 136(3):343-50.  
737
- 738 42. Baumeister P, Luo S, Skarnes WC, Sui G, Seto E, Shi Y, Lee AS (2005) Endoplasmic reticulum  
739 stress induction of the Grp78/BiP promoter: activating mechanisms mediated by YY1 and its  
740 interactive chromatin modifiers. *Mol Cell Biol*. 25(11):4529-40.  
741
- 742 43. Yoshida H, Matsui T, Yamamoto A, Okada T, Mori K (2001) XBP1 mRNA is induced by  
743 ATF6 and spliced by IRE1 in response to ER stress to produce a highly active transcription factor.  
744 *Cell* 28: 881-891.  
745

- 746 44. Nishitoh H (2012) CHOP is a multifunctional transcription factor in the ER stress response. *J*  
747 *Biochem* 151(3):217-9.  
748
- 749 45. Ma Y, Hendershot LM (2003) Delineation of a negative feedback regulatory loop that controls  
750 protein translation during endoplasmic reticulum stress. *J Biol Chem* 278(37):34864-73.  
751
- 752 46. Jiang XS, Tang LY, Dai J, Zhou H, Li SJ, Xia QC, Wu JR, Zeng R (2005) Quantitative analysis  
753 of severe acute respiratory syndrome (SARS)-associated coronavirus-infected cells using proteomic  
754 approaches: implications for cellular responses to virus infection. *Mol Cell Proteomics* 4: 902-913.  
755
- 756 47. Versteeg GA, van de Nes PS, Bredenbeek PJ, Spaan WJ (2007) The coronavirus spike protein  
757 induces endoplasmic reticulum stress and upregulation of intracellular chemokine mRNA  
758 concentrations. *J Virol* 81: 10981-10990.  
759
- 760 48. Yeung YS, Yip CW, Hon CC, Chow KY, Ma IC, Zeng F, Leung FC (2008) Transcriptional  
761 profiling of Vero E6 cells over-expressing SARS-CoV s2 subunit: insights on viral regulation of  
762 apoptosis and proliferation. *Virology* 371: 32-43.  
763
- 764 49. Fabregat A, Sidiropoulos K, Viteri G, Forner O, Marin-Garcia P, Arnau V, D'Eustachio P, Stein  
765 L, Hermjakob H (2017) Reactome pathway analysis: a high-performance in-memory approach.  
766 *BMC Bioinformatics* 18(1):142.  
767
- 768 50. Calfon M, Zeng H, Urano F, Till JH, Hubbard SR, Harding HP, Clark SG, Ron D (2002) IRE1  
769 couples endoplasmic reticulum load to secretory capacity by processing the XBP-1 mRNA. *Nature*  
770 415: 92-96.  
771
- 772 51. Ye J, Rawson RB, Komuro R, Chen X, Davé UP, Prywes R, Brown MS, Goldstein JL (2000)  
773 ER stress induces cleavage of membrane-bound ATF6 by the same proteases that process SREBPs.  
774 *Mol Cell* 6: 1355-1364.  
775
- 776 52. Haze K, Yoshida H, Yanagi H, Yura U, Mori K (1999) Mammalian transcription factor ATF6 is  
777 synthesized as a transmembrane protein and activated by proteolysis in response to endoplasmic  
778 reticulum stress. *Mol Biol Cell* 10:3787-3799.  
779
- 780 53. Harding HP, Zhang Y, Ron D (1999) Protein translation and folding are coupled by an  
781 endoplasmic-reticulum-resident kinase. *Nature* 397: 271-274.  
782
- 783 54. Harding HP, Zhang Y, Bertolotti A, Zeng H, Ron D (2000) Perk is essential for translational  
784 regulation and cell survival during the unfolded protein response. *Mol Cell* 5: 897-904.  
785
- 786 55. Harding HP, Novoa I, Zhang Y, Zeng H, Wek R, Schapira M, Ron D (2000) Regulated  
787 translation initiation controls stress-induced gene expression in mammalian cells. *Mol Cell* 6: 1099-  
788 1108.  
789
- 790 56. Axten JM, Medina JR, Feng Y, Shu A, Romeril SP, Grant SW, Li WH, Heerding DA, Minthorn  
791 E, Mencken T, Atkins C, Liu Q, Rabindran S, Kumar R, Hong X, Goetz A, Stanley T, Taylor JD,  
792 Sigethy SD, Tomberlin GH, Hassell AM, Kahler KM, Shewchuk LM, Gampe RT (2012) Discovery  
793 of 7-methyl-5-(1-{[3-(trifluoromethyl)phenyl]acetyl}-2,3-dihydro-1H-indol-5-yl)-7H-pyrrolo[2,3-  
794 d]pyrimidin-4-amine (GSK2606414), a potent and selective first-in-class inhibitor of protein kinase  
795 R (PKR)-like endoplasmic reticulum kinase (PERK). *J Med Chem* 55, 7193-7207.  
796

- 797 57. Harding HP, Zyryanova AF, Ron D (2012) Uncoupling proteostasis and development in vitro  
798 with a small molecule inhibitor of the pancreatic endoplasmic reticulum kinase, PERK. *J Biol Chem*  
799 287, 44338-44344.  
800
- 801 58. Lazar C, Uta M, Branza-Nichita N (2014) Modulation of the unfolded protein response by the  
802 human hepatitis B virus. *Front Microbiol* 5: 433.  
803
- 804 59. Carpenter JE, Grose C (2014) Varicella-zoster glycoprotein expression differentially induces the  
805 unfolded protein response in infected cells. *Front Microbiol* 5: 322.  
806
- 807 60. Chan SW (2014) The unfolded protein response in virus infections. *Front Microbiol* 5: 518.  
808
- 809 61. Perera N, Miller JL, Zitzmann N (2017) The role of the unfolded protein response in dengue  
810 virus pathogenesis. *Cell Microbiol* 19: doi: 10.1111/cmi.12734  
811
- 812 62. David-Ferreira JF, Manaker RA (1965) An electron microscopy study of the development of a  
813 mouse hepatitis virus in tissue culture cells. *J Cell Biol* 24: 57-78.  
814
- 815 63. Klumperman J, Locker JK, Meijer A, Horzinek MC, Geuze HJ, Rottier PJ (1994) Coronavirus  
816 M proteins accumulate in the Golgi complex beyond the site of virion budding. *J Virol* 68: 6523-  
817 6534.  
818
- 819 64. Stertz S, Reichelt M, Spiegel M, Kuri T, Martínez-Sobrido L, García-Sastre A, Weber F, Kochs  
820 G (2007) The intracellular sites of early replication and budding of SARS-coronavirus. *Virology*  
821 361: 304-315.  
822
- 823 65. Reggiori F, Monastyrska I, Verheije MH, Cali T, Ulasli M, Bianchi S, Bernasconi R, de Haan  
824 CA, Molinari M (2010) Coronaviruses hijack the LC3-I-positive EDEMosomes, ER-derived  
825 vesicles exporting short-lived ERAD regulators, for replication. *Cell Host Microbe* 7: 500-508.  
826
- 827 66. Maier HJ, Hawes PC, Cottam EM, Mantell J, Verkade P, Monaghan P, Wileman T, Britton P  
828 (2013) Infectious bronchitis virus generates spherules from zippered endoplasmic reticulum  
829 membranes. *MBio* 4: e00801-13.  
830
- 831 67. Fung TS, Liao Y, Liu DX (2014) The endoplasmic reticulum stress sensor IREa protects cells  
832 from apoptosis induced by the coronavirus infectious bronchitis virus. *J Virol* 88: 12752-12764.  
833
- 834 68. Fung TS, Huang M, Liu DX (2014) Coronavirus-induced ER stress response and its  
835 involvement in regulation of coronavirus-host interactions. *Virus Res* 194: 110-123.  
836
- 837 69. DeDiego ML, Nieto-Torres JL, Jiménez-Guardeño JM, Regla-Nava JA, Alvarez E, Oliveros JC,  
838 Zhao J, Fett C, Perlman S, Enjuanes L (2011) Severe acute respiratory syndrome coronavirus  
839 envelope protein regulates cell stress response and apoptosis. *PLoS Pathog* 7: e1002315.  
840
- 841 70. Liao Y, Fung TS, Huang M, Fang SG, Zhong Y, Liu DX (2013) Upregulation of  
842 CHOP/GADD153 during coronavirus infectious bronchitis virus infection modulates apoptosis by  
843 restricting activation of the extracellular signal-regulated kinase pathway. *J Virol* 87: 8124-8134.  
844
- 845 71. Cruz JL, Sola I, Becares M, Alberca B, Plana J, Enjuanes L, Zuñiga S (2011) Coronavirus gene  
846 7 counteracts host defenses and modulates virus virulence. *PLoS Pathog* 7: e1002090.  
847



- 848 72. Brina D, Grosso S, Miluzio A, Biffo S (2011) Translational control by 80S formation and 60S  
849 availability: the central role of eIF6, a rate limiting factor in cell cycle progression and  
850 tumorigenesis. *Cell Cycle* 10, 3441-3446.  
851
- 852 73. Hinnebusch AG (2014) The scanning mechanism of eukaryotic translation initiation. *Annu Rev*  
853 *Biochem* 83, 779-812.  
854
- 855 74. Kamitani W, Narayanan K, Huang C, Lokugamage K, Ikegami T, Ito N, Kubo H, Makino S  
856 (2006) Severe acute respiratory syndrome coronavirus nsp1 protein suppresses host gene expression  
857 by promoting host mRNA degradation. *Proc Natl Acad Sci U S A* 103: 12885-12890.  
858
- 859 75. Huang C, Lokugamage KG, Rozovics JM, Narayanan K, Semler BL, Makino S (2011) SARS  
860 coronavirus nsp1 protein induces template-dependent endonucleolytic cleavage of mRNAs: viral  
861 mRNAs are resistant to nsp1-induced RNA cleavage. *PLoS Pathog* 7: e1002433.  
862
- 863 76. Tahara SM, Dietlin TA, Bergmann CC, Nelson GW, Kyuwa S, Anthony RP, Stohlman SA  
864 (1994) Coronavirus translational regulation: leader affects mRNA efficiency. *Virology* 202: 621-  
865 630.  
866
- 867 77. Tanaka T, Kamitani W, DeDiego ML, Enjuanes L, Matsuura Y (2012) Severe acute respiratory  
868 syndrome coronavirus nsp1 facilitates efficient propagation in cells through a specific translational  
869 shutoff of host mRNA. *J Virol* 86: 11128-11137.  
870
- 871 78. Coley SE, Lavi E, Sawicki SG, Fu L, Schelle B, Karl, N, Siddell SG, Thiel V (2005)  
872 Recombinant mouse hepatitis virus strain A59 from cloned, full-length cDNA replicates to high  
873 titers in vitro and is fully pathogenic *in vivo*. *J Virol* 79: 3097-3106.  
874
- 875 79. Chung BY, Hardcastle TJ, Jones JD, Irigoyen N, Firth AE, Baulcombe DC, Brierley I (2015)  
876 The use of duplex-specific nuclease in ribosome profiling and a user-friendly software package for  
877 Ribo-seq data analysis. *RNA* 21: 1731-1745.  
878
- 879 80. Dobin A, Davis CA, Schlesinger F, Drenkow J, Zaleski C, Jha S, Batut P, Chaisson M,  
880 Gingeras TR (2013) STAR: ultrafast universal RNA-seq aligner. *Bioinformatics* 1;29(1):15-21.  
881
- 882 81. Anders S, Pyl PT, Huber W (2015) HTSeq - a Python framework to work with high-throughput  
883 sequencing data. *Bioinformatics* 31: 166-169.  
884
- 885 82. Langmead B, Trapnell C, Pop M, Salzberg SL (2009) Ultrafast and memory-efficient alignment  
886 of short DNA sequences to the human genome. *Genome Biol* 10(3):R25.  
887
- 888 83. Mi H, Muruganujan A, Huang X, Ebert D, Mills C, GuoX, Thomas PD (2019) Protocol Update  
889 for large-scale genome and gene function analysis with the PANTHER classification system  
890 (v.14.0). *Nat Protoc* 14(3):703-721.  
891
- 892 84. Eckert EA (1966) Envelope protein(s) derived from influenza virus. *J Bacteriol* 91: 1907-1910.  
893
- 894 85. Reed LJ, Muench H. (1938). A simple method of estimating fifty percent endpoints. *Am. J.*  
895 *Epidemiol.* 27, 493-497.  
896  
897  
898

899 **Figure Captions:**

900

901 **Figure 1: Effect of MHV infection on cellular transcription.** (A) Volcano plot showing the  
902 relative change in abundance of cellular transcripts and the FDR-corrected  $p$  value for differential  
903 expression between the mock and infected samples. Grey vertical lines indicate a transcript  
904 abundance fold change of 2. Genes which have fold changes greater than this threshold and a  $p$   
905 value of less than 0.05 are considered significantly differentially expressed and coloured orange if  
906 up-regulated and blue if down-regulated. Selected genes are annotated in red and *Rpl19*, a  
907 housekeeping gene, in yellow. (B) GO terms associated with the lists of differentially expressed  
908 genes were determined. GO terms which are significantly enriched compared to a background of  
909 GO terms associated with all genes detected in the differential transcription analysis are plotted.  
910 Results associated with up-regulated gene list are in orange, down-regulated in blue. To avoid  
911 redundancy, only the most specific GO term from each hierarchical cluster (determined by  
912 PANTHER [80]) is plotted here, with only the top 20 enriched clusters plotted for the up-regulated  
913 gene list. The GO term “response to topologically incorrect protein” is within the cluster “response  
914 to unfolded protein”. Only results with a  $p$  value of less than 0.05 are plotted, ranked by  $\log_2$ (fold  
915 enrichment). Full results, including GO IDs, are in Supplementary Table 2. (C) Quantitative real-  
916 time PCR (qRT-PCR) of selected up- (left panel) and down- (middle panel) regulated mRNAs in  
917 three biological replicates of mock- and MHV-infected cells at 5 h p.i. Levels were normalised to  
918 ribosomal protein L19 (*Rpl19*) transcript.

919

920 **Figure 2: Effects of MHV infection on translational efficiency (TE).** (A) Volcano plot showing  
921 the relative change in TE of cellular transcripts, and the FDR-corrected  $p$  value, between the mock  
922 and infected samples. Grey vertical lines indicate a fold change of 2. Genes which have fold  
923 changes greater than this threshold and a  $p$  value of less than 0.05 are considered significantly  
924 differentially translated and coloured orange if up-regulated and blue if down-regulated. Selected  
925 genes are annotated in red and mentioned in the article text, except for the metabolism-related genes

926 *Ldha* – lactate dehydrogenase A, and *Uqcrcq* - ubiquinol-cytochrome c reductase, complex III  
927 subunit VII. (B) Plot of  $\log_2$ (fold changes) of TE vs transcript abundance for all genes included in  
928 both analyses. Grey lines indicate fold changes of 2. Fold changes are plotted without filtering for  
929 significant *p* values. Selected genes from each section are marked: genes up-regulated solely by  
930 either transcription or TE are marked in blue (upper middle and right middle sections), genes down-  
931 regulated solely by either transcription or TE are marked in red (lower middle and left middle  
932 sections), genes which are ‘buffered’ by having opposing changes in transcription and TE are in  
933 black (top left and bottom right sections), and *Chop*, which is up-regulated at the level of both  
934 transcription and TE, is marked in green (top right section).

935

936 **Figure 3: Effect of MHV infection on unfolded protein response IRE 1 $\alpha$  and ATF6 activity.** 17

937 CI-1 cells were incubated in the presence of tunicamycin (2  $\mu$ g/ml) or infected with MHV-A59  
938 (MOI 10) and harvested at 2.5, 5, 8 and 10 h p.i. (A) RT-PCR analysis of *Xbp-1u* and *Xbp-1s*  
939 mRNAs. Total RNA (1 $\mu$ g) was subjected to RT-PCR analysis using primers flanking the *Xbp-1*  
940 splice site. PCR products were resolved in a 3% TBE-agarose gel and visualised by ethidium  
941 bromide staining. *Rpl19* RT-PCR product was used as a loading control. Molecular size markers  
942 (nt) are indicated on the left. Note as gel loads are normalised by total RNA concentration, *Xbp-1*  
943 mRNA levels appear to diminish at late timepoints in samples from MHV infected cells, as the  
944 increased viral RNA levels decrease the relative proportion of *Xbp-1* transcripts in the load. (B)  
945 Analysis of RPFs (mock and MHV-infected samples plus tunicamycin-treated sample) and  
946 RNASeq (mock and MHV-infected samples) mapping to *Xbp-1u* (NCBI RefSeq mRNA  
947 NM\_013842). Cells harvested by flash-freezing. Reads are plotted at the inferred position of the  
948 ribosomal P site (calculated based on the position of the 5 end of the read) and coloured according  
949 to the frame of translation: pink for 0-frame, blue for +1, yellow for +2. The 5' end position of  
950 RNASeq reads is not determined by ribosome position and therefore should not show a dominant  
951 frame. The main ORF (0 frame) is shown at the top in pink, with start and stop codons in all three



952 frames marked by green and red bars (respectively) in the three panels below. The yellow rectangle  
953 in the +2 frame indicates the extended ORF in *Xbp-1s* and reads resulting from translation of this  
954 spliced isoform can be seen in yellow (+2 frame), downstream of the main ORF annotated stop  
955 codon. Dotted lines serve as markers for the start and end of the features in their matching colour.  
956 Note that read densities are plotted as reads per million host-mRNA-mapping reads, and that bar  
957 widths were increased to 4-nt to aid visibility and were plotted on top of each other starting from the  
958 5' end of the transcript. (C) qRT-PCR of three biological replicates of *BiP* transcripts normalised by  
959 *Rpl19* transcript. Note that the *BiP/Rpl19* transcription ratio is the one plotted. (D) Cell lysates were  
960 analysed by 12% SDS-PAGE and immunoblotted using anti-BiP and anti-N antibodies (green  
961 fluorescent secondary antibody). GAPDH was used as a loading control (red fluorescent secondary  
962 antibody). Molecular masses (kDa) are indicated on the left.

963

964 **Figure 4: Effect of MHV infection on unfolded protein response PERK-eIF2 $\alpha$ -ATF4 activity.**

965 17 Cl-1 cells were incubated in the presence of tunicamycin (2  $\mu$ g/ml) or infected with MHV-A59  
966 (MOI 10) and harvested at 2.5, 5, 8 and 10 h p.i. (A) qRT-PCR of three biological replicates of  
967 *Chop* transcripts normalised by *Rpl19* transcript. Note that the *Chop/Rpl19* transcription ratio is the  
968 one plotted. (B) Cell lysates were separated by 12% SDS-PAGE and immunoblotted using anti-  
969 ATF4, anti-p-eIF2 $\alpha$ , anti-eIF2 $\alpha$ , anti-PERK and anti-N antibodies (green fluorescent secondary  
970 antibody). GAPDH was used as a loading control (red fluorescent secondary antibody). Molecular  
971 masses (kDa) are indicated on the left. (C) Analysis of RPFs (mock and MHV-infected samples  
972 plus tunicamycin-treated sample) and RNASeq (mock and MHV-infected samples) mapping to *Atf4*  
973 (NCBI RefSeq mRNA NM\_009716). Plot constructed as described for Fig 3D but with yellow  
974 rectangles in the +2 frame here representing the *Atf4* uORFs.

975 **Figure 5: Polysome profiling of 17 Cl-1 cells infected with MHV-A59.** (A) Mock-infected (upper

976 panel) and MHV-infected (lower panel) 17 Cl-1 cells were harvested at 2.5, 5 and 8 h p.i.

977 Cytoplasmic lysates were resolved on 10–50% sucrose density gradients. Gradients were  
978 fractionated and fractions monitored by absorbance ( $A_{254}$  nm). Twelve [numbered] fractions were  
979 collected and proteins extracted, resolved by 12% SDS-PAGE and analysed by immunoblotting  
980 using the indicated antibodies (anti-S6 as 40S marker, anti-RPL10 as 60S marker, anti-N and anti-  
981 S). **(B)** Mock-infected (left panel) and MHV-infected (right panel) 17 Cl-1 cells were harvested at 5  
982 h p.i. in high-salt lysis buffer (400 mM KCl) and analysed as described above. Molecular masses  
983 (kDa) are indicated on the left. Lane "Inp" contains whole cell lysate.

984 **Figure 6: Effect of GSK-2606414 on MHV-infected cells.** **(A)** 17 Cl-1 mock and MHV-infected  
985 cells were treated with 1–5  $\mu$ M of the GSK-2606414 (PERKi). PERKi was added to the cells  
986 immediately after the virus adsorption period was completed and maintained in the medium until  
987 cells were harvested 5 h and 8 h later. In the upper panel, cell lysates were separated by 12% SDS-  
988 PAGE and immunoblotted using anti-S, anti-p-eIF2 $\alpha$  and anti-eIF2 $\alpha$  (green fluorescent secondary  
989 antibody), and anti-N sera (red fluorescent secondary antibody). In the lower panel, cell lysates  
990 were separated by 12% SDS-PAGE and immunoblotted using anti-PERK and anti-N (green  
991 fluorescent secondary antibody), and anti-GAPDH sera (red fluorescent secondary antibody).  
992 Molecular masses (kDa) are indicated on the left. **(B)** 17 Cl-1 cells infected with MHV-A59 and  
993 treated with 0, 2.5 or 5  $\mu$ M of GSK-2606414 were metabolically pulse-labeled with [ $^{35}$ S]Met for 1 h  
994 at 5 h p.i. Cells were lysed just after pulse and subjected to 10% SDS-PAGE followed by  
995 autoradiography. **(C)** Polysome profiling of MHV-infected cells at 5 h p.i. treated with 5 $\mu$ M of the  
996 PERKi. **(D)** Representative images of mock and MHV-infected cells at 5 h p.i. treated with 0, 2.5 or  
997 5  $\mu$ M of GSK-2606414. **(E)** TCID<sub>50</sub> assays were performed with serial dilutions of the supernatant  
998 containing released virions (extracellular) or from extracellular media and cells subjected to a cycle  
999 of freezing/thawing (intra- and extracellular virions) from 17 Cl-1 cells infected with MHV-A59 in  
1000 the presence or absence of 5  $\mu$ M of PERKi. Values show the means of triplicate titrations. Error  
1001 bars represent standard errors. All *t*-tests are two-tailed and assume separate variances for the two  
1002 populations being compared. **(F)** qRT-PCR of three biological replicates of *BiP* transcripts

1003 normalised by *Rpl19* transcript. Note that the *BiP/Rpl19* transcription ratio is the one plotted (upper  
1004 panel). RT-PCR analysis of *Xbp-1u* and *Xbp-1s* mRNAs. Total RNA (1µg) was subjected to RT-  
1005 PCR analysis using primers flanking the *Xbp-1* splice site. PCR products were resolved in a 3%  
1006 TBE-agarose gel and visualised by ethidium bromide staining. *Rpl19* RT-PCR product was used as  
1007 a loading control. Molecular size markers (nt) are indicated on the left (lower panel).

1008

A.

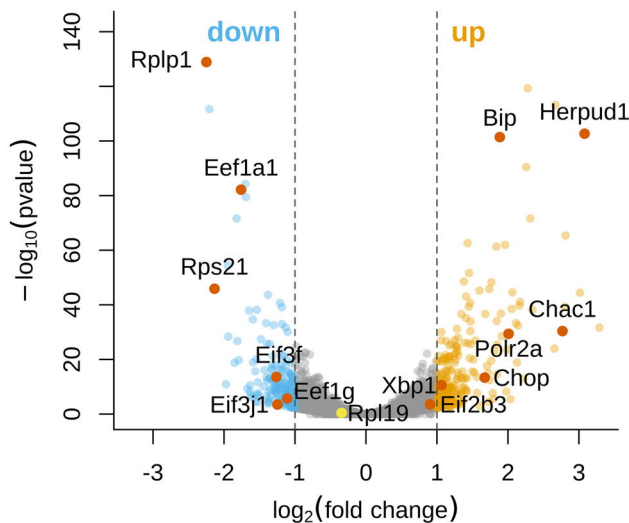

C.

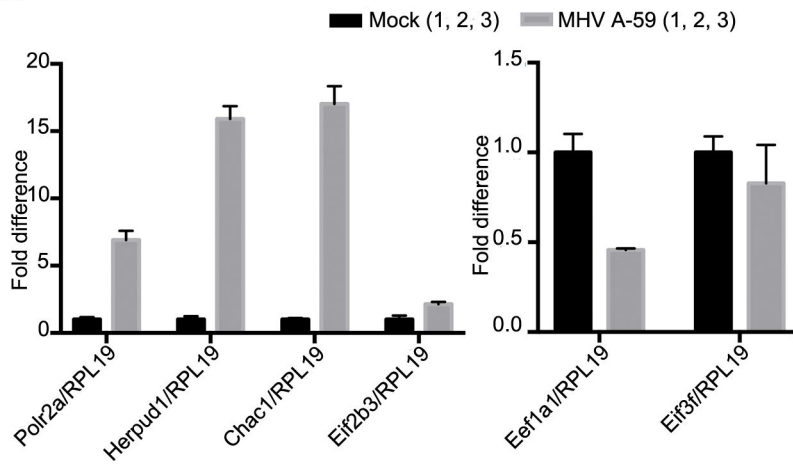

B.

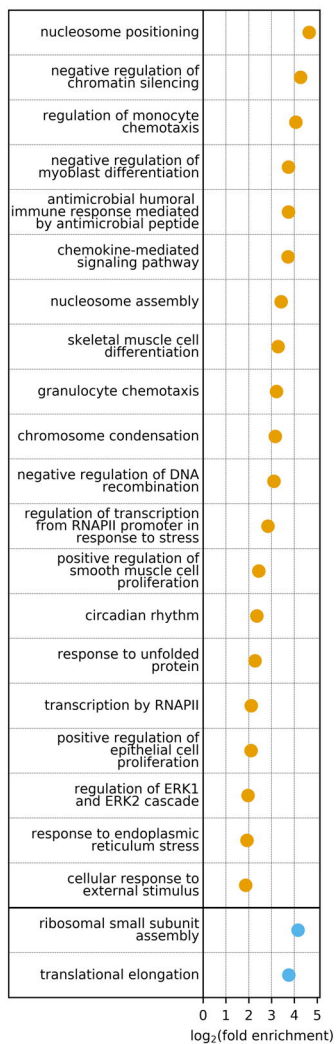

A.

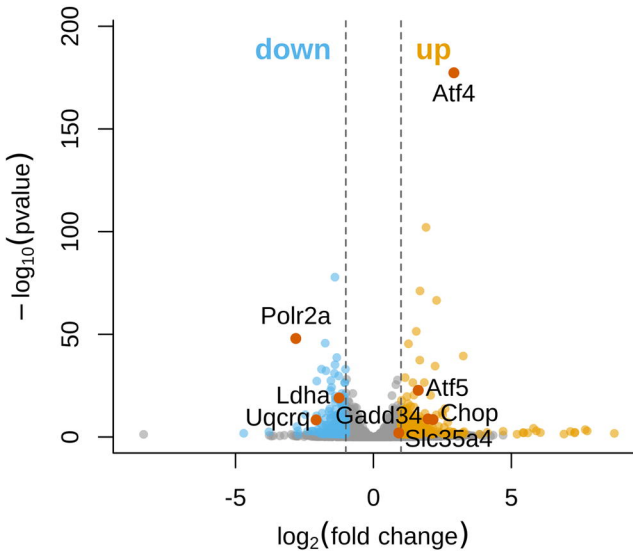

B.

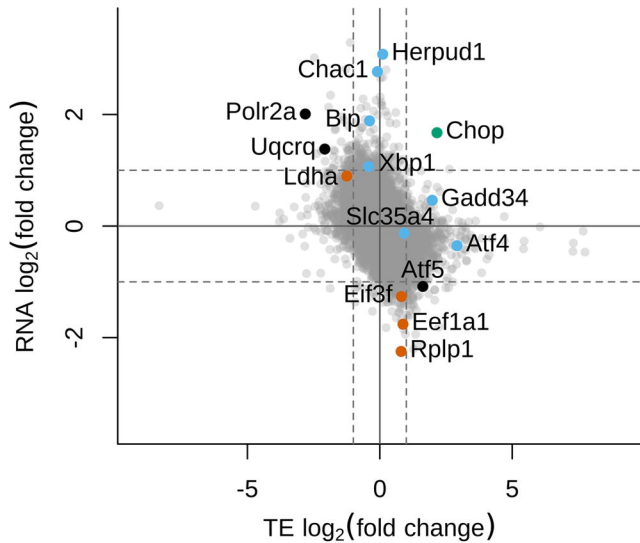

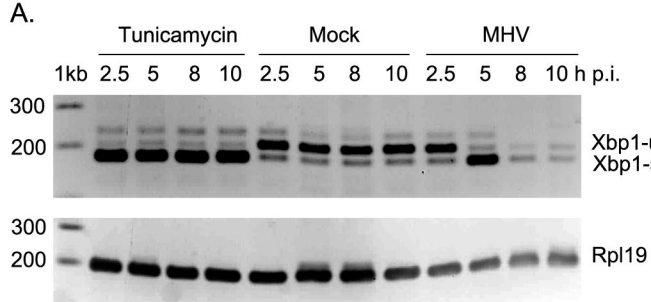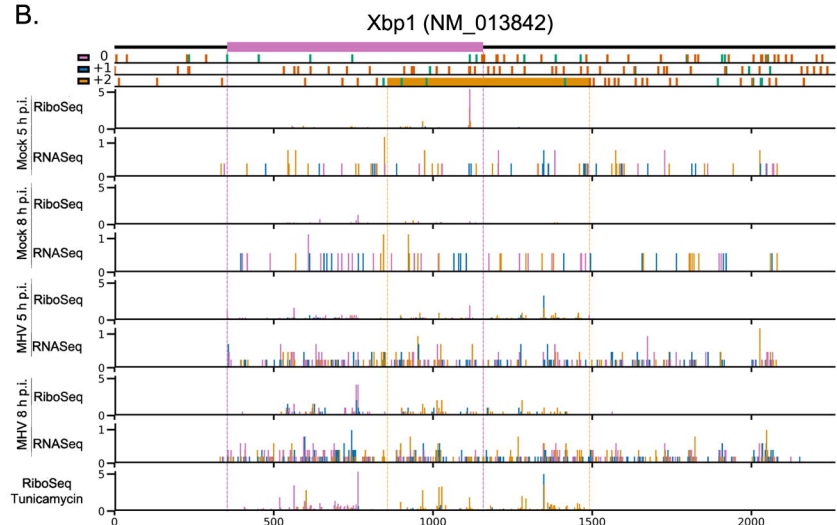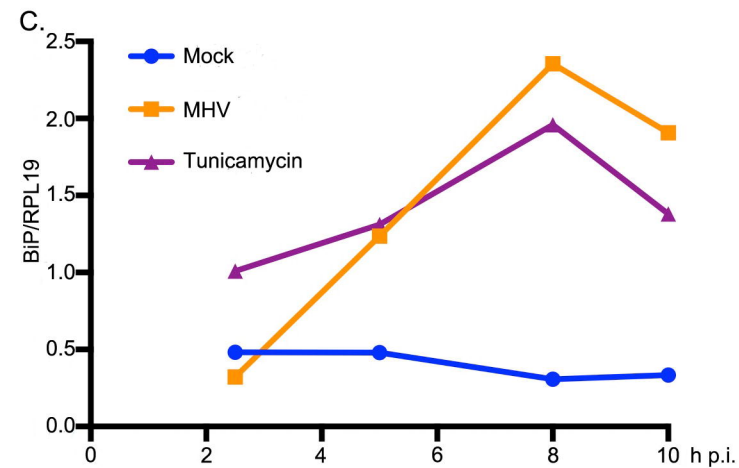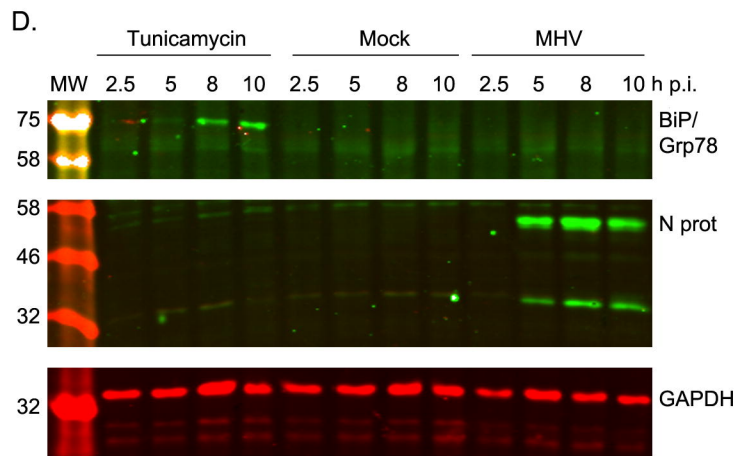

A.

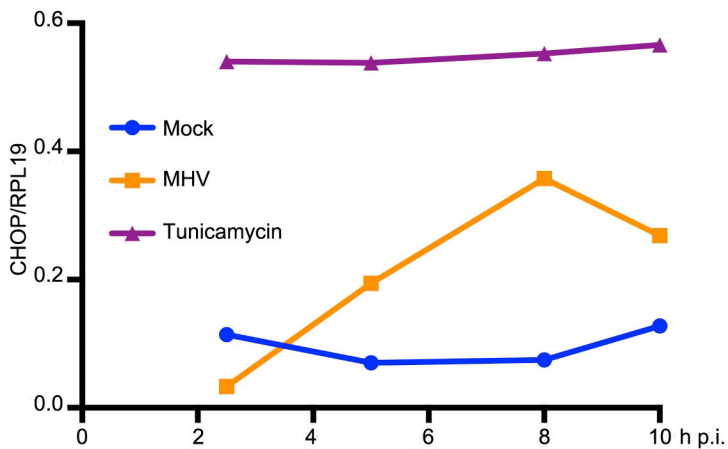

B.

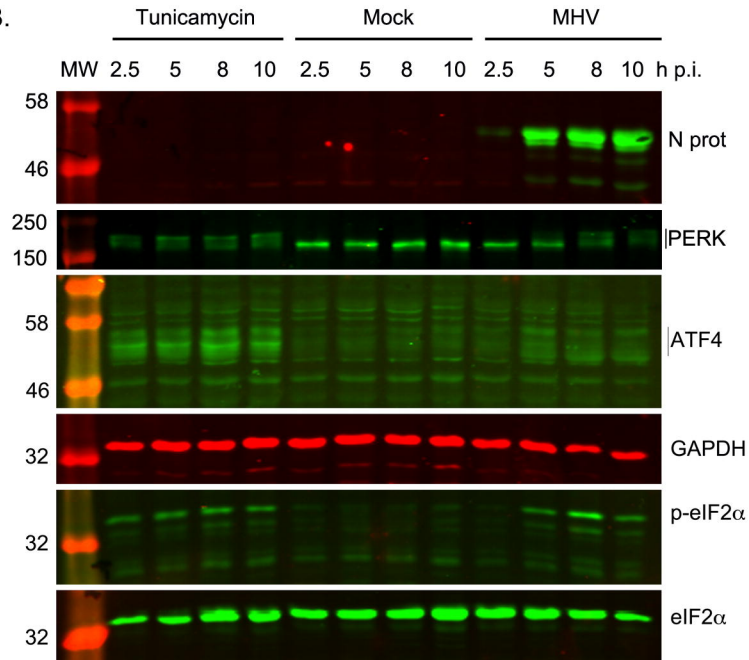

C.

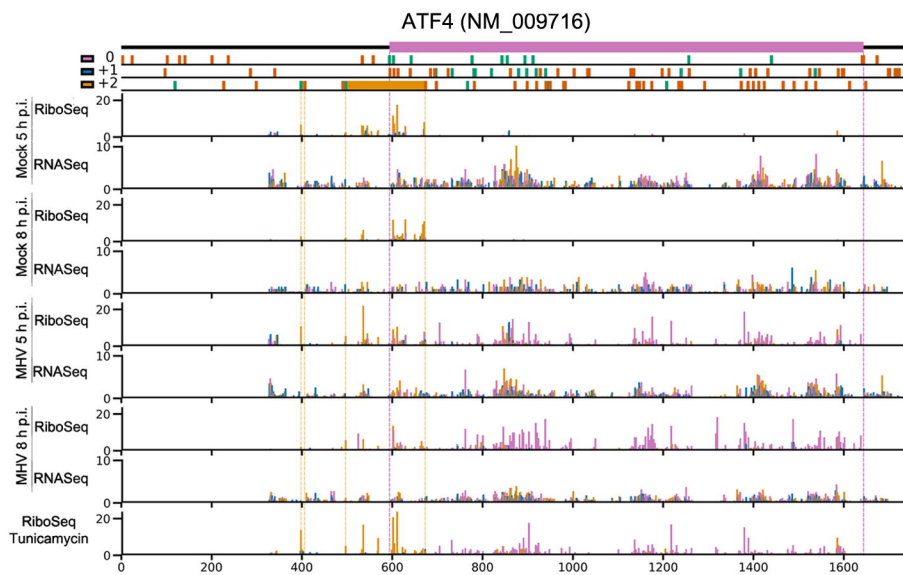

A.

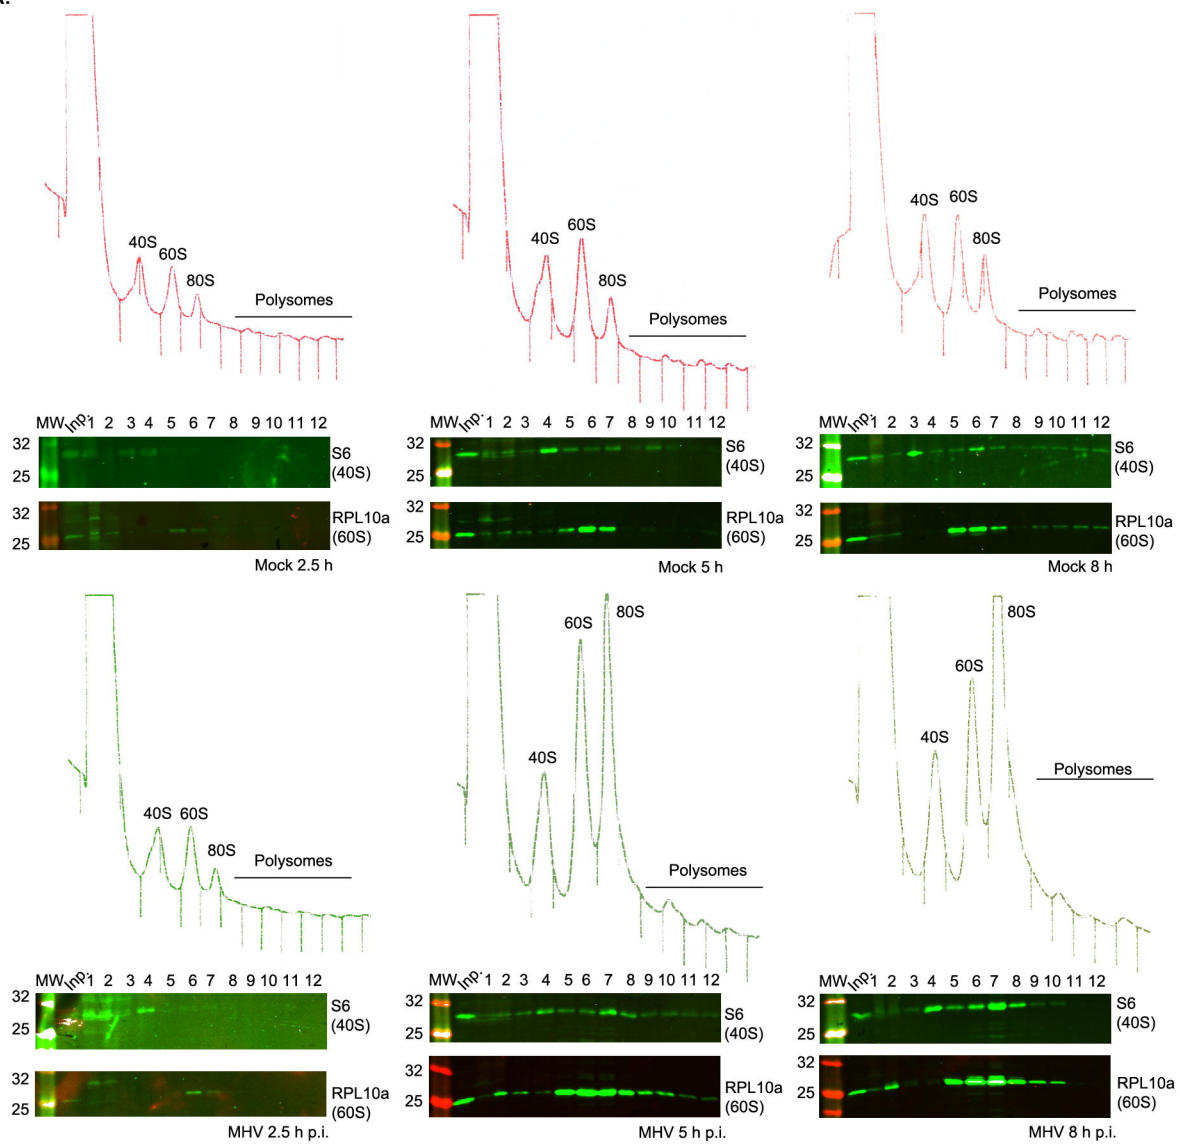

B.

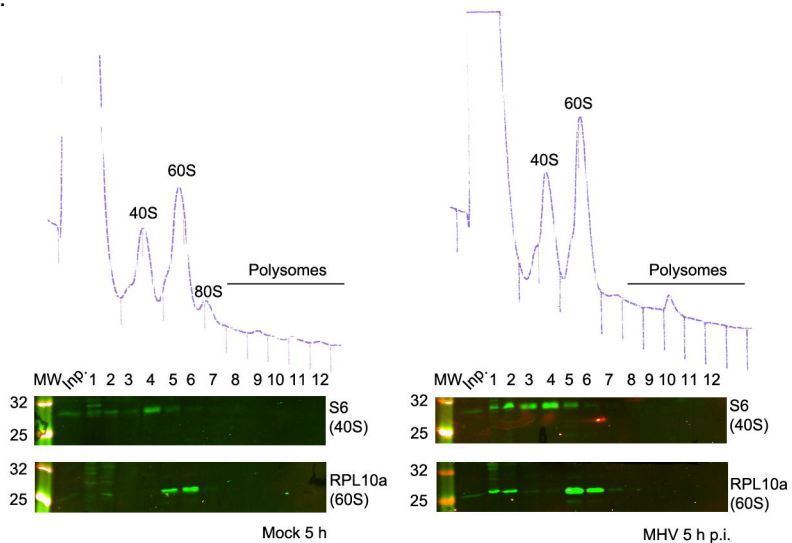

Source: https://www.biorxiv.org/content/10.1101/292979v3.full.pdf
