1     **Manipulation of the unfolded protein response: a pharmacological strategy against**  
2                                   **coronavirus infection**

3  
4     Liliana Echavarría-Consuegra<sup>#1</sup>, Georgia M. Cook<sup>#1</sup>, Idoia Busnadiego<sup>2</sup>, Charlotte Lefèvre<sup>1</sup>,  
5         Sarah Keep<sup>3</sup>, Katherine Brown<sup>1</sup>, Nicole Doyle<sup>3</sup>, Giulia Dowgier<sup>3</sup>, Krzysztof Franaszek<sup>1</sup>,  
6         Nathan A. Moore<sup>4,5</sup>, Stuart G. Siddell<sup>4</sup>, Erica Bickerton<sup>3</sup>, Benjamin G. Hale<sup>2</sup>, Andrew E.  
7                                   Firth<sup>1</sup>, Ian Brierley<sup>1</sup>, Nerea Irigoyen<sup>1\*</sup>

8     <sup>1</sup>Division of Virology, Department of Pathology, University of Cambridge, Tennis Court Road,  
9     Cambridge, United Kingdom.

10    <sup>2</sup>Institute of Medical Virology, University of Zurich, Zurich, Switzerland.

11    <sup>3</sup>The Pirbright Institute, Woking, Surrey, United Kingdom.

12    <sup>4</sup>Department of Cellular and Molecular Medicine, University of Bristol, Bristol, United  
13    Kingdom.

14    <sup>5</sup>Current address: Basingstoke and North Hampshire Hospital, Hampshire Hospitals, NHS  
15    Foundation Trust.

16    Running Title: Targeting the unfolded protein response in coronavirus infection

17    <sup>#</sup>These authors contributed equally.

18

19    \*Corresponding author: [ni236@cam.ac.uk](mailto:ni236@cam.ac.uk)

20

21    **Keywords:** SARS-CoV-2, murine coronavirus, unfolded protein response, ribosome profiling,  
22    RNASeq, antiviral intervention.

23

24

## 25 **Abstract**

26 Coronavirus infection induces the unfolded protein response (UPR), a cellular signalling  
27 pathway composed of three branches, triggered by unfolded proteins in the endoplasmic  
28 reticulum (ER) due to high ER load. We have used RNA sequencing and ribosome profiling to  
29 investigate holistically the transcriptional and translational response to cellular infection by  
30 murine hepatitis virus (MHV), often used as a model for the *Betacoronavirus* genus to which  
31 the recently emerged SARS-CoV-2 also belongs. We found the UPR to be amongst the most  
32 significantly up-regulated pathways in response to MHV infection. To confirm and extend  
33 these observations, we show experimentally the induction of all three branches of the UPR in  
34 both MHV- and SARS-CoV-2-infected cells. Over-expression of the SARS-CoV-2 ORF8 or S  
35 proteins alone is itself sufficient to induce the UPR. Remarkably, pharmacological inhibition  
36 of the UPR greatly reduced the replication of both MHV and SARS-CoV-2, revealing the  
37 importance of this pathway for successful coronavirus replication. This was particularly  
38 striking when both IRE1 $\alpha$  and ATF6 branches of the UPR were inhibited, reducing SARS-  
39 CoV-2 virion release ~1,000-fold. Together, these data highlight the UPR as a promising  
40 antiviral target to combat coronavirus infection.

41

## 42 **Author Summary**

43 SARS-CoV-2 is the novel coronavirus responsible for the COVID-19 pandemic which has  
44 resulted in over 100 million cases since the end of 2019. Most people infected with the virus  
45 will experience mild to moderate respiratory illness and recover without any special treatment.  
46 However, older people, and those with underlying medical problems like chronic respiratory  
47 disease are more likely to develop a serious illness. So far, more than 2 million people have  
48 died of COVID-19. Unfortunately, there is no specific medication for this viral disease.

49

50 In order to produce viral proteins and to replicate their genetic information, all coronaviruses  
51 use a cellular structure known as the endoplasmic reticulum or ER. However, the massive  
52 production and modification of viral proteins stresses the ER and this activates a compensatory  
53 cellular response that tries to reduce ER protein levels. This is termed the unfolded protein  
54 response or UPR. We believe that coronaviruses take advantage of the activation of the UPR  
55 to enhance their replication.

56

57 The UPR is also activated in some types of cancer and neurodegenerative disorders and UPR  
58 inhibitor drugs have been developed to tackle these diseases. In this work, we have tested some  
59 of these compounds in human lung cells infected with SARS-CoV-2 and found that virus  
60 production was reduced 1000-fold in human lung cells.

61

## 62 **Introduction**

63 The *Coronaviridae* are a family of enveloped viruses with positive-sense, non-segmented,  
64 single-stranded RNA genomes. Coronaviruses (CoVs) cause a broad range of diseases in  
65 animals and humans. SARS-CoV, MERS-CoV and SARS-CoV-2, members of the genus  
66 *Betacoronavirus*, are three CoVs of particular medical importance due to high mortality rates  
67 and pandemic capacity [1–3]. SARS-CoV-2 is the causative agent of the current COVID-19  
68 pandemic, which has resulted in over 95 million cases and more than 2 million deaths since the  
69 end of 2019. Although 15% of the cases develop a severe pathology, no specific therapeutic  
70 treatment for COVID-19 has been approved to date, highlighting the urgent need to identify  
71 new antiviral strategies to combat SARS-CoV-2, besides future CoV zoonoses.

72

73 During CoV replication, the massive production and modification of viral proteins, as well as  
74 virion budding-related endoplasmic reticulum (ER) membrane depletion, can lead to

75 overloading of the folding capacity of the ER and consequently, ER stress [4]. This activates  
76 the unfolded protein response (UPR) which is controlled by three ER-resident transmembrane  
77 sensors: inositol-requiring enzyme-1  $\alpha$  (IRE1 $\alpha$ ), activating transcription factor-6 (ATF6), and  
78 PKR-like ER kinase (PERK), each triggering a different branch of the UPR (Fig 1A).  
79 Activation of these pathways leads to decreased protein synthesis and increased ER folding  
80 capacity, returning the cell to homeostasis [5].

81

82 Here, we characterise global changes in the host translome and transcriptome during murine  
83 coronavirus (MHV) infection using RNA sequencing (RNASeq) and ribosome profiling  
84 (RiboSeq). MHV is a member of the *Betacoronavirus* genus and is widely used as a model to  
85 study the replication and biology of members of the genus. In this analysis, the UPR is one of  
86 the most significantly enriched pathways. We further confirm the activation of all three  
87 branches of the UPR in MHV-infected cells. Extending our investigation to SARS-CoV-2, we  
88 find that infection with this novel CoV also activates all three UPR pathways. Moreover, we  
89 demonstrate that individual over-expression of SARS-CoV-2 ORF8 and S proteins is sufficient  
90 to induce the UPR. Remarkably, pharmacological inhibition of the UPR had a dramatic  
91 negative effect on MHV and SARS-CoV-2 replication, suggesting that CoVs may subvert the  
92 UPR to their own advantage. These results reveal that pharmacological manipulation of the  
93 UPR can be used as a therapeutic strategy against coronavirus infection.

94

## 95 **Results**

### 96 **Differential gene expression analysis of murine cells infected with MHV-A59**

97 To survey genome-wide changes in host transcription and translation during CoV infection,  
98 murine 17 clone 1 cells (17 Cl-1) were infected with recombinant MHV-A59 at a multiplicity  
99 of infection (MOI) of 10, or mock-infected, in duplicate and harvested at 5 hours post-infection

100 (h p.i.). Lysates were subjected to RNASeq and parallel RiboSeq [6,7], which allows global  
101 monitoring of cellular translation by mapping the positions and abundance of translating  
102 ribosomes on the transcriptome with sub-codon precision. Quality control analysis confirmed  
103 the libraries were of high quality (S1 Figure, S1 Table).

104

105 To assess the effects of MHV infection on cellular transcript abundance, differential expression  
106 analysis was performed at 5 h p.i. with DESeq2 [8] (Fig 1B and C, S2 and S3 Tables). At this  
107 timepoint, viral RNA synthesis approaches a maximum, but it precedes the onset of cytopathic  
108 effects such as syncytium formation [7]. Between infected and mock-infected conditions, genes  
109 with a fold change  $\geq 2$  and a false discovery rate (FDR)-corrected  $p$  value of  $\leq 0.05$  were  
110 considered to be significantly differentially transcribed (S2 Table). To determine the biological  
111 pathways involved in the response to infection, we carried out Reactome pathway enrichment  
112 analysis [9] on the lists of significantly differentially transcribed genes (Fig 1B, S3 Table). The  
113 most significantly enriched pathway associated with transcriptionally up-regulated genes was  
114 “Unfolded Protein Response” (R-HSA-381119,  $p = 1.1 \times 10^{-10}$ ), and pathways denoting the  
115 three branches of the UPR (ATF6 branch: R-HSA-381183, PERK branch: R-HSA-380994,  
116 IRE1 $\alpha$  branch: R-HSA-381070) were also significantly enriched (S3 Table). Consistent with  
117 this, gene ontology (GO) term enrichment analysis of the transcriptionally up-regulated gene  
118 list revealed that UPR-related GO terms, such as “response to unfolded protein”  
119 (GO:0006986), were significantly enriched (S3 Table). Many of the enriched pathways and  
120 GO terms associated with transcriptionally down-regulated genes are related to protein  
121 synthesis, again highlighting this as a key theme of the host response.

122

123 We provide the full database of differentially expressed genes and enriched pathways/GO  
124 terms for further exploration (S2 and S3 Tables) but in this manuscript we will focus

125 predominantly on the UPR, which has been recognised as a host response to several CoVs due  
126 to the extensive dependence of CoV replication on the ER [4]. Accordingly, some of the most  
127 differentially transcribed genes are involved in the UPR, such as *Herp* (also known as *Herpud*),  
128 *Chac1*, *Bip* (also known as *Grp78* or *Hspa5*), *Chop* (also known as *Ddit3* or *Gadd153*) and  
129 *Grp94* (also known as *Hsp90b1*) (Fig 1C).

130

131 To evaluate differences at the level of translation, we calculated relative translation efficiencies  
132 (TE; defined herein as the ratio of ribosome-protected-fragment [RPF] to total RNA density in  
133 the CDS of a given gene) at 5 h p.i. using Xtail [10], applying the same fold change and *p*-  
134 value thresholds as for the transcription analysis. As shown in Fig 1D, several of the  
135 translationally up-regulated genes encode key proteins involved in activation of the UPR, for  
136 example ATF4, ATF5 and CHOP, which are effector transcription factors [11–16]. GADD34  
137 (also known as MYD116/PPP1R15A), a protein that acts as a negative regulator to diminish  
138 prolonged UPR activation [17,18], was also translationally up-regulated.

139

140 Given that UPR activation can lead to eIF2 $\alpha$  phosphorylation and host translational shut-off,  
141 we investigated whether the list of mRNAs found to be preferentially translated during MHV  
142 infection was enriched for genes resistant to translational repression by phosphorylated eIF2 $\alpha$   
143 (p-eIF2 $\alpha$ ) (Materials and Methods, S4 Table). We found a 9.15-fold enrichment of p-eIF2 $\alpha$   
144 resistant genes ( $p = 1.42 \times 10^{-4}$ , Fisher Exact Test). Resistance to the effects of p-eIF2 $\alpha$  has been  
145 linked to the presence of efficiently translated upstream open reading frames (uORFs) in the 5'  
146 UTR [11–16,19]. To investigate this in our dataset, we analysed ribosome occupancy of the  
147 main ORF compared to the uORFs on *Atf4*, a well-studied example(12) (Fig 1E). Translation  
148 of the short (three codon) uORF1 was observed under all conditions. In mock-infected samples,  
149 uORF2 was efficiently translated, largely precluding translation of the main ORF (pink). In

150 contrast, in MHV-infected cells, a large proportion of ribosomes scan past uORF2 to translate  
151 the main ORF. This is consistent with previous studies on *Atf4* translation under conditions of  
152 eIF2 $\alpha$  phosphorylation, in which many ribosomes cannot reassemble a competent initiation  
153 complex before reaching uORF2 [11,12]. This facilitates increased production of Atf4 even  
154 when translation of most mRNAs is inhibited.

155

156 Comparison of the fold changes at the transcriptional and translational level for individual  
157 cellular mRNAs provides insight into the overall effect on gene expression (Fig 1F). Genes  
158 regulated in opposing directions transcriptionally and translationally likely result in a small  
159 overall change in expression, whereas genes regulated only in one direction likely result in a  
160 greater overall change. Many UPR genes fall into the latter category (orange points, top-centre  
161 and right-centre), reflecting published knowledge about the induction of these genes  
162 specifically at the transcriptional [20–23] or translational level [12–16,19]. *Chop* (green point,  
163 upper-right) is a rare example of a gene that is significantly up-regulated both transcriptionally  
164 and translationally during MHV infection. This reflects the fact that it is transcriptionally  
165 induced by ATF4 during UPR activation and translationally p-eIF2 $\alpha$ -resistant [24,25].

166

167 Together, the ribosome profiling results highlight the UPR as a key pathway in the host  
168 response to MHV infection, with many of the greatest expression changes observed for UPR-  
169 related genes.

170

### 171 **MHV infection and activation of the unfolded protein response**

172 To further explore the extent of UPR activation during MHV infection, we investigated each  
173 of the three branches individually (Fig 1A), building on the work of several groups [26–30].

174

175 *Monitoring the PERK-eIF2 $\alpha$ -ATF4 branch*

176 Upon ER stress, PERK oligomerises and auto-phosphorylates [31]. Activated PERK  
177 phosphorylates the  $\alpha$ -subunit of eIF2 which in turn impairs recycling of inactive eIF2-GDP to  
178 active eIF2-GTP, resulting in a general shutdown of protein synthesis [32]. However,  
179 translation of ATF4 is increased in this situation [12,33,34] leading to the induction of its target  
180 genes *Chop* and *Gadd34* (Fig 1A, right). To assay PERK activation, we monitored expression  
181 of PERK, CHOP, ATF4 and p-eIF2 $\alpha$ , by qRT-PCR and western blotting. 17 Cl-1 cells were  
182 infected with MHV-A59 or incubated with tunicamycin and harvested at 2.5, 5, 8 and 10 h.  
183 Tunicamycin, used as a positive control, is a pharmacological inducer of ER stress which  
184 activates all UPR signalling pathways. From 5 h p.i. onwards in MHV-infected cells, and at all  
185 timepoints in tunicamycin-treated cells, ATF4 and p-eIF2 $\alpha$  were detected and multiple bands  
186 were observed for PERK (Fig 2A) corresponding to the auto-phosphorylated species, indicative  
187 of activation of this kinase upon ER stress. In addition, as shown in Fig 2B, *Chop* and *Gadd34*  
188 mRNA levels in MHV-infected cells (blue squares) increased from 2.5 to 8 h p.i., similarly to  
189 tunicamycin-treated cells (red circles), indicating their induction by the transcription factor  
190 ATF4.

191

192 Virus-induced inhibition of translation as a consequence of eIF2 $\alpha$  phosphorylation was  
193 confirmed by analytical polysome profiling in 17 Cl-1 cells (Fig 2C, upper panel), revealing  
194 the accumulation of monosomes (80S) in MHV-infected cells at 5 h p.i. In higher salt profiles  
195 (400 mM KCl; Fig 2C, lower panel), where 80S ribosomes lacking mRNA dissociate into  
196 constituent subunits, a large reduction in 80S ribosomes was seen. These data are highly  
197 consistent with inhibition of translation initiation and show that the vast majority of 80S  
198 ribosomes accumulating at this time point are not mRNA-associated. These data support the



199 view that MHV infection leads to translational shut-off via inhibited initiation, consistent with  
200 the effects of eIF2 $\alpha$  phosphorylation.

201

### 202 *Monitoring the IRE1 $\alpha$ -XBP1 branch*

203 Activated IRE1 $\alpha$  (Fig 1A, left) removes a 26-nt intron from unspliced *Xbp1* (*Xbp1-u*) mRNA  
204 leading to a translational reading frame shift and a longer protein [23,35]. The product of  
205 spliced *Xbp1* mRNA (XBP1-s) is an active transcription factor that up-regulates the expression  
206 of ER-associated degradation (ERAD) components and ER chaperones. To study this, we  
207 analysed *Xbp1-u* and *Xbp1-s* mRNAs by reverse transcriptase PCR (RT-PCR), using specific  
208 primers flanking the splice site (Fig 2D). At all timepoints, *Xbp1-u* was the predominant form  
209 in mock-infected cells whereas *Xbp1-s* was the major species in tunicamycin-treated cells. In  
210 virus-infected cells, *Xbp1-s* became predominant at 5 h p.i. This was corroborated at the  
211 translational level in the ribosome profiling datasets, in which infected samples showed  
212 increased translation of the extended ORF (yellow) generated by splicing (S2 Figure). An  
213 increase in active XBP1-s transcription factor was further supported by the finding that two of  
214 its target genes are transcriptionally up-regulated in infected cells (*ERdj4* – 2.44-fold increase  
215  $p=6.63\times 10^{-08}$ ; and *P58ipk* – 1.94-fold increase  $p=3.97\times 10^{-11}$ ) (S2 Table). These data indicate  
216 that the IRE1 $\alpha$ -Xbp1 pathway is activated by MHV infection.

217

### 218 *Monitoring the ATF6 branch*

219 The ATF6 branch is activated when ATF6 translocates from the ER to the Golgi apparatus,  
220 where it is cleaved [36]. After cleavage, the amino-terminus of ATF6 (ATF6-Nt) translocates  
221 to the nucleus to up-regulate ER chaperones (Fig 1A, middle). To monitor this pathway, 17 Cl-  
222 1 cells were infected with MHV-A59 or incubated with tunicamycin and analysed by western  
223 blotting (to detect ATF6 cleavage) or by immunofluorescence (to detect ATF6 nuclear

224 translocation) (S3A, S3B and S3C Figures). However, we were unable to detect the trimmed  
225 version of ATF6 nor a clear nuclear translocation. As ATF6-Nt was also not visible in the  
226 positive control tunicamycin-treated cells, it is likely that the antibodies used do not efficiently  
227 recognise mouse ATF6-Nt in this context.

228

229 As an alternative approach, we monitored the induction of *BiP*, *Grp94* and *calreticulin*,  
230 transcriptionally up-regulated genes in the Reactome category “ATF6 (ATF6-alpha) activates  
231 chaperone genes” (S3 Table) and known to be induced by ATF6-Nt [37,38]. BiP mRNA or  
232 protein levels are often used as a proxy for activation of the ATF6 pathway; however, its  
233 transcription can eventually be regulated by other UPR factors such as XBP1 [39] and ATF4  
234 [40], so it can also be used as general readout of ER stress [26,37]. Cells were harvested at 2.5,  
235 5 and 8 h p.i. and analysed by qRT-PCR (Fig 2E). An increase in *Bip* transcription was observed  
236 in tunicamycin-treated (red circles) and to a lesser extent in MHV-infected cells (blue squares)  
237 from 2.5 to 8 h p.i., whereas mock-infected cells (green triangles) showed no induction. Despite  
238 the transcriptional up-regulation and a noticeable increase in RiboSeq reads mapping to BiP  
239 (S3D Figure), the protein was not detectable by western blot in MHV-infected cells (Fig 2F).  
240 It is not yet clear why this is the case, although down-regulation of BiP at the protein level has  
241 previously been observed during infection with other members of the order *Nidovirales*  
242 [30,41]. Nevertheless, an increase in *calreticulin* and *Grp94* transcription (Fig 2E) was  
243 observed in tunicamycin-treated cells (red circles) and to a greater extent in MHV-infected  
244 cells (blue squares) especially at 8 h p.i. This indicates that the ATF6 pathway is highly up-  
245 regulated during MHV-infection. Together with our studies of PERK-eIF2 $\alpha$ -ATF4 and IRE1 $\alpha$ -  
246 Xbp1 above, these data confirm that MHV infection induces all three branches of the UPR.

247

248 **Effect of UPR inhibitors on MHV replication**

249 Based on the strong UPR activation brought about by MHV infection, we hypothesised that  
250 pharmacological manipulation of this pathway could be used to modulate viral replication.  
251 First, we determined cell viability after drug treatment using Cell Titre Glo and trypan blue  
252 exclusion assays (S4 Figure). Subsequently, we evaluated the inhibitory effect of four different  
253 UPR inhibitors (UPRi) on each one of the UPR branches in cells infected with MHV for 8 h at  
254 MOI 5 (S5 Figure).

255

256 GSK-2606414 (henceforth referred to as PERKi) is a specific inhibitor of PERK [42,43]. As  
257 expected, PERKi treatment prevented autophosphorylation of PERK and reduced  
258 phosphorylation of its substrate, eIF2 $\alpha$  (S5A Figure), effectively blocking this branch of the  
259 UPR. Pulse labelling of infected cells for one hour at 5 h p.i. revealed a modest increase of both  
260 viral and host protein synthesis, with no effect on mock-infected cells (S5B Figure). Analytical  
261 polysome profiling of MHV-infected cells treated with 5  $\mu$ M PERKi for 5 h (S5C Figure)  
262 revealed a decrease in the accumulation of monosomes (80S) compared to MHV-infected cells  
263 at 5 h p.i. (Fig 2C, upper right panel), indicating a relief of translation inhibition.

264

265 Integrated stress response inhibitor (ISRIB) acts downstream of eIF2 $\alpha$  in the PERK pathway  
266 by preventing p-eIF2 $\alpha$  from binding and inhibiting eIF2B [44]. Therefore, eIF2B can recycle  
267 eIF2-GDP to active eIF2-GTP, and translation initiation can still occur, despite the levels of p-  
268 eIF2 $\alpha$  remaining unchanged. Inhibition of the PERK pathway downstream of eIF2 $\alpha$  is evident  
269 from the decrease in *Chop* transcription in MHV-infected cells treated with 2  $\mu$ M ISRIB (S5D  
270 Figure).

271

272 STF-083010 (henceforth referred to as IREi) is a specific IRE1 $\alpha$  endonuclease inhibitor that  
273 does not affect its kinase activity [45]. In MHV-infected cells treated with IREi at 60  $\mu$ M (8 h

274 p.i., S5E Figure) the unspliced form of Xbp1 was more prominent compared to the untreated  
275 MHV-infected cells, indicating a block in the endonuclease activity of this enzyme.

276

277 AEBSF, a serine protease inhibitor, prevents ER stress-induced cleavage of ATF6 resulting in  
278 inhibition of transcriptional induction of ATF6 target genes [46]. We investigated the induction  
279 of ATF6 target genes in MHV-infected cells treated with 100  $\mu$ M AEBSF as previously  
280 described. As anticipated, *calreticulin* and *Grp94* transcription was greatly reduced in AEBSF-  
281 treated cells (S5F Figure).

282

283 Having shown these compounds effectively inhibit the UPR in the context of infection, we  
284 moved on to assess whether this could lead to an inhibition of viral replication. Cells were  
285 infected with MHV at MOI 5 and treated with the UPRi. At 8 h p.i., tissue culture supernatant  
286 was harvested and released progeny quantified by plaque assay. We found significant  
287 reductions in virus titres for all UPRi treatments in comparison to control cells, with fold  
288 reductions of between ~two-fold (IREi) and ~six-fold (ISRIB) (Fig 3A). This supports our  
289 hypothesis that modulation of the UPR can have antiviral effects.

290

291 Next, we investigated whether using the UPRi in combination would have a cumulative effect  
292 on virus release. We confirmed that combination treatment conditions led to reversal of the  
293 three branches of the UPR, assayed as described above (S6 Figure). Fig 3B shows virus titres  
294 from infected cells (8 h p.i.) at MOI 1 (blue) and MOI 5 (red), treated with different UPRi  
295 combinations. Reductions in virus titre ranged from ~four-fold, in cells incubated with PERKi  
296 and ISRIB (both targeting the PERK-eIF2 $\alpha$ -ATF4 branch), to ~40- and ~100-fold (MOI 5 and  
297 1 respectively), in cells treated with IREi and AEBSF (targeting the IRE1 $\alpha$  and the ATF6  
298 pathways). This was further confirmed by western blotting, demonstrating a striking decrease

299 in N protein levels for treatment combinations where virus titres were lowest (Fig 3C). In  
300 addition, cell monolayers infected with MHV in the presence of IREi and AEBSF showed  
301 delayed cytopathic effect, as indicated by reduced syncytium formation, likely due to lower  
302 virus production (Fig 3D).

303

### 304 **Mechanistic analysis of the UPR activation by SARS-CoV-2 proteins**

305 Having established the use of UPRi as a potential antiviral strategy, we moved on to study UPR  
306 activation by SARS-CoV-2, initially assaying the cellular response to individual virus proteins  
307 in the context of transfection.

308

309 Previous studies have indicated that expression of the SARS-CoV spike (S) protein can activate  
310 the PERK-eIF2 $\alpha$ -ATF4 branch [47] whereas the MHV S protein activates the IRE1 $\alpha$ -XBP1  
311 pathway (28). In addition, SARS-CoV ORF3a and ORF8 were found to activate the PERK-  
312 eIF2 $\alpha$ -ATF4 and ATF6 pathways, respectively [48,49]. To define the UPR activation  
313 associated with the counterpart proteins from SARS-CoV-2, we expressed C-terminally-tagged  
314 S (S-HA), ORF3a (ORF3a-FLAG) and ORF8 (ORF8-FLAG) proteins in human embryonic  
315 kidney cells (HEK-293T cells). N, a structural protein which is not documented as activating  
316 the UPR, was over-expressed as a negative control (N-FLAG).

317

318 ER stress, assessed by the induction of HERP and BiP, was induced by SARS-CoV-2 S but not  
319 N (S7A Figure). The PERK-eIF2 $\alpha$ -ATF4 branch was activated from 24 h p.t. onwards, as  
320 indicated by the phosphorylation of eIF2 $\alpha$  and the detection of ATF4 (S7A Figure), although  
321 phosphorylation of PERK was not clearly evident. The activation of this pathway was further  
322 confirmed by the increase in *CHOP* transcription compared to mock-transfected cells (S7B  
323 Figure). The amino terminus of ATF6 (ATF6-Nt) was detected in S-transfected cells from 24

324 h p.t. onwards (S7A Figure), indicating activation of the ATF6 branch. Activation of the IRE1 $\alpha$   
325 pathway is also evident from an increase in the spliced form of *XBPI* in S protein-transfected  
326 cells (S7A Figure). Contrary to previous findings for SARS-CoV, this indicates that the  
327 expression of the SARS-CoV-2 S protein is sufficient to induce all three major signalling  
328 pathways of the UPR.

329

330 In the case of SARS-CoV-2 ORF8 transfection, IRE1 $\alpha$ -XBP1 and ATF6 were the main  
331 pathways induced (S7C Figure), again contrasting with findings for SARS-CoV [49]. Although  
332 a slight activation of ATF4 was observed in ORF8-transfected cells at 36 h p.t. (S7C Figure),  
333 this was not accompanied by PERK nor eIF2 $\alpha$  phosphorylation, and induction of *CHOP*  
334 transcription was lower than in S protein-transfected cells (S7B Figure). SARS-CoV-2 ORF3a  
335 transfection did not induce any of the branches of the UPR (S7C Figure).

336

337 We then asked whether the UPR induction caused by SARS-CoV-2 S and ORF8  
338 overexpression could be reversed by treatment with UPRi. This was confirmed for each  
339 inhibitor individually (S8 Figure). Additionally, we tested this using a combination treatment  
340 condition (Fig 4), for which we selected IREi/AEBSF as this gave the most promising reduction  
341 in viral titre during MHV infection (Fig 3B). Treatment of SARS-CoV-2 S- and ORF8-  
342 transfected cells with IREi/AEBSF reduced expression of HERP and BiP to levels comparable  
343 to mock-transfected cells (Fig 4A, 36 h p.t.). This indicates the treatment successfully reversed  
344 the UPR activation by the two viral proteins. PERK pathway inhibition was evident in treated  
345 cells from the reduction in PERK and eIF2 $\alpha$  phosphorylation (Fig 4A); however, ATF4 levels  
346 appeared to be slightly increased under these conditions, as was induction of its target gene  
347 *CHOP* (S8C Figure). ATF4 induction in the presence of IREi has been previously described

348 [50]. Inhibition of the ATF6 and the IRE1 $\alpha$ -XBP1 pathways was also evident, as very little  
349 ATF6-Nt and *XBP1-s* were present in IREi/AEBSF treated cells (Fig 4A and Fig 4B).

350

351 In summary, over-expression of the S and the ORF8 proteins of SARS-CoV-2 is sufficient to  
352 activate the three branches of the UPR, and this can be reversed by UPRi treatment.

353

### 354 **Induction of the UPR in SARS-CoV-2-infected cells**

355 We went on to study UPR activation in the context of SARS-CoV-2 infection. Vero CCL81  
356 cells were infected at MOI 1 and harvested at 24 and 48 h p.i. Lysates were analysed as above.

357 As shown in Fig 5A, the PERK-eIF2 $\alpha$ -ATF4 branch was activated as indicated by increased  
358 phosphorylation of PERK and eIF2 $\alpha$ . This was further confirmed by the induction of ATF4

359 (Fig 5A) and *CHOP* in infected cells (S9A Figure). Detection of ATF6-Nt (Fig 5A)

360 demonstrates that the ATF6 pathway is also activated during the course of infection. In

361 addition, activation of the IRE1 $\alpha$  pathway was evident from an increase in the spliced form of

362 *XBP1* in SARS-CoV-2-infected cells at 48 h p.i. (Fig 5A). We conclude that SARS-CoV-2

363 infection induces all three branches of the UPR.

364

### 365 **Effect of the IREi/AEBSF combination on SARS-CoV-2 infection**

366 Next, we investigated whether the previously described UPRi combinations could also be used  
367 as potential antiviral drugs against SARS-CoV-2. The gastrointestinal tract is known to be one

368 of the key sites of SARS-CoV-2 infection *in vivo* [51] so we used Caco2 cells, human intestinal

369 cells shown to be permissive for SARS-CoV-2 infection [52,53]. Cells were infected with

370 SARS-CoV-2 at MOI 0.01 and treated with the different UPRi combinations. Supernatants

371 were harvested at 48 h p.i. and released virions quantified by TCID<sub>50</sub> assay (Fig 5B).

372 Reductions in virus titre were observed and these were generally much greater than those seen

373 for MHV (MOI 1 and 5, Fig 3B), with both the PERKi/IREi and IREi/AEBSF combinations  
374 reducing virus titres to below the limit of detection.

375

376 As the IREi/AEBSF combination had the greatest inhibitory activity against both MHV and  
377 SARS-CoV-2, we tested whether this combination could inhibit SARS-CoV-2 infection at a  
378 higher MOI. In addition to Vero CCL81 cells we employed a human lung cell line (Calu3) as  
379 a model for the primary site of SARS-CoV-2 infection, the lung [52,53]. Cells were infected at  
380 MOI 1 or MOI 5 and virus titres assessed by plaque assays at 24 h p.i. Incubation of Vero cells  
381 with IREi/AEBSF led to a statistically significant ( $p = 0.0241$  for MOI 1 and  $p = 0.0033$  for  
382 MOI 5) ~100-fold reduction in virus titre (Fig 5C, left). In Calu3 cells, IREi/AEBSF treatment  
383 had an even greater antiviral effect, reducing released virions by ~1,000-fold ( $p = 0.0017$ ) to at  
384 or around the limit of detection (Fig 5C, right).

385

386 Detailed analysis of the activation of the three UPR pathways under the IREi/AEBSF treatment  
387 condition was performed in SARS-CoV-2-infected Vero CCL81 cells at 24 and 48 h p.i. (Fig  
388 5A and S9A Figure). Interestingly, in both SARS-CoV-2- and MHV-infected cells, the  
389 IREi/AEBSF combination was not only able to prevent activation of the IREi and ATF6  
390 pathways, but also the PERK-eIF2 $\alpha$ -ATF4 branch, as indicated by reduced phosphorylation of  
391 PERK and eIF2 $\alpha$  (Fig 5A and S6 Figure) and reduced transcription of *Chop* (S6C Figure and  
392 S9A Figure). This may be due to the inhibition of viral replication leading to a reduced ER  
393 load, as opposed to specific inhibition of the PERK pathway. This is supported by the  
394 observation of a striking decrease in viral protein levels in infected cells treated with  
395 IREi/AEBSF (Fig 3C and Fig 5A), consistent with reduced viral replication. This reversal of  
396 CoV-induced UPR activation by the UPRi suggests that the antiviral activity of these



397 compounds can be attributed, at least in part, to specific inhibition of the UPR, a pathway which  
398 is evidently required for efficient viral replication.

399

400 In addition to its role in UPR inhibition, AEBSF has also been reported to inhibit TMPRSS2  
401 [54,55], a host serine protease essential for SARS-CoV-2 cell entry [53]. To test whether  
402 AEBSF treatment inhibits SARS-CoV-2 cell entry, we transfected HEK-293T cells with  
403 TMPRSS2 and ACE2, the SARS-CoV-2 cell entry receptor [56] and incubated them with  
404 lentiviral particles pseudotyped with the SARS-CoV-2 S protein (S9B Figure). No significant  
405 inhibition of viral entry was observed upon treatment with 100 $\mu$ M AEBSF for 4 hours,  
406 suggesting that the antiviral activity of AEBSF is predominantly due to its inhibition of the  
407 UPR.

408

## 409 **Discussion**

410 This study reveals that all three branches of the UPR are activated upon MHV and SARS-CoV-  
411 2 infection, and highlights this as a very prominent pathway in the host response. The UPR was  
412 the most significantly enriched Reactome pathway associated with genes transcriptionally up-  
413 regulated during MHV infection and, consistent with previous studies, we show activation of  
414 all three branches of the UPR by MHV [26,28]. Confirming the importance of this in SARS-  
415 CoV-2 infection, ER-related GO/KEGG terms are enriched in the differentially expressed  
416 genes lists of several proteomics/transcriptomics studies on SARS-CoV-2-infected cells  
417 [30,57–60]. This is also a very prominent theme in proteomics studies identifying host  
418 interaction partners of SARS-CoV-2 proteins, in which ER proteins are reproducibly found  
419 [59,61,62]. In one such study, “response to endoplasmic reticulum stress” was the most highly  
420 enriched biological process GO annotation associated with the host interaction partners [62].  
421 This suggests that SARS-CoV-2, like other CoVs [63–65], enacts a finely tuned modulation of

422 the UPR that may involve direct interactions with its components. Despite this, the activation  
423 of the three branches of the UPR by SARS-CoV-2 has not been previously described, although  
424 it has been characterised for other CoVs [4,30,63,66–70] including the closely related SARS-  
425 CoV [28,47–49,71–75]. Here we show that, like MHV, SARS-CoV-2 infection induces all  
426 three branches of the UPR, in contrast to results from SARS-CoV infection, in which only the  
427 PERK branch was activated [28,71,72].

428

429 Over-expression of the individual SARS-CoV-2 S or ORF8 proteins initiates UPR signalling.  
430 S protein was found to induce all three branches of the UPR in contrast to the counterpart  
431 protein of SARS-CoV, which appears to induce exclusively the PERK pathway [47]. Similarly,  
432 we identify ORF8 of SARS-CoV-2 as an inducer of both the IRE1 $\alpha$  and ATF6 branches of the  
433 UPR, whereas the SARS-CoV equivalent has been shown to activate only ATF6 [49]. These  
434 differences can partly be explained by sequence divergence between the two viruses [76].  
435 SARS-CoV-2 ORF8, for example, lacks the VLVVL motif that causes SARS-CoV ORF8  
436 (specifically ORF8b) to aggregate and trigger intracellular stress pathways [74]. Furthermore,  
437 SARS-CoV ORF8ab was shown to mediate activation of the ATF6 pathway through a direct  
438 interaction with the ATF6 ER-luminal domain [49], although it is undetermined whether the  
439 corresponding interaction occurs with SARS-CoV-2 ORF8. Recent proteomics-based  
440 interactome studies have identified interactions between SARS-CoV-2 ORF8 and several ER  
441 quality control proteins [59,61], which could contribute to the ORF8-induced UPR induction  
442 observed in our study. Alterations to this key UPR modulator have important ramifications:  
443 mutation or deletion of ORF8 in naturally occurring strains of SARS-CoV and SARS-CoV-2  
444 correlate with milder disease and, in the latter case, lower incidence of hypoxia [77–80].

445

446 Here, we also demonstrate the importance of UPR activation to CoV infection by showing that  
447 pharmacological inhibition of the UPR leads to significant reductions in titres of virions  
448 released from MHV- and SARS-CoV-2-infected cells. Simultaneous inhibition of the IRE1 $\alpha$   
449 and ATF6 pathways by STF-083010 and AEBSF respectively, was particularly effective,  
450 reducing virus titres by up to ~1,000-fold. These drugs have been extensively used in  
451 preclinical studies for neurodegenerative diseases, cancer and pulmonary fibrosis [45,81–85].  
452 Thus the STF-083010/AEBSF combination is a promising antiviral candidate to rapidly  
453 progress into a clinical trial.

454

455 To date, the development of antivirals against SARS-CoV-2 has focused on drugs targeting  
456 virus replication, such as remdesivir. However, these antiviral therapies do not take into  
457 account that the pathophysiology associated with COVID-19 is mostly related to an aberrant  
458 cellular response. In some clinical manifestations of COVID-19, an exacerbated UPR could  
459 play a key role [86–88]. For example, activation of ER stress and the UPR is one of the major  
460 triggers of endothelial dysfunction [89,90], which is associated with acute respiratory distress  
461 syndrome (ARDS) [91], a diffuse inflammatory lung injury present in 20-67% of hospitalised  
462 patients [92,93]. Other clinical manifestations of COVID-19 such as thromboembolism,  
463 cerebro- and cardiovascular diseases and neurological complications, are also associated with  
464 endothelial dysfunction [94]. Furthermore, a recognised sequela of COVID-19 is pulmonary  
465 fibrosis [95], which can develop in up to 17% of COVID-19 patients [96]. Pulmonary fibrosis  
466 is a severe form of interstitial lung disease characterised by progressive dyspnea, hypoxemia,  
467 and respiratory failure due to the presence of patchy areas of fibrotic tissue. ER stress and UPR  
468 activation are known to be involved in the development and progression of this fibrotic disease  
469 [97]. This suggests that UPR activation in response to SARS-CoV-2 infection contributes to  
470 the lung pathophysiology associated with COVID-19. Therefore, the UPR inhibitors used in

471 this study could have a dual therapeutic effect, not only contributing to the reduction of viral  
472 burden in patients, but also diminishing the pathophysiology associated with COVID-19. In  
473 addition, the idea of targeting an exaggerated cellular response instead of the virus itself  
474 substantially reduces the chances of generating virus escape mutants.

475

## 476 **Materials and Methods**

477

478 **Cells and viruses:** Murine 17 clone 1 (17 Cl-1), Calu3 (ATCC, HTB-55) and Vero (ATCC,  
479 CCL81) cells were maintained in Dulbecco's modification of Eagle's medium supplemented  
480 with 10% (vol/vol) fetal calf serum (FCS). HEK-293T cells (ATCC, CRL-11268) were  
481 cultured in DMEM supplemented with 5% FCS. Caco2 cells were a kind gift from Dr Valeria  
482 Lulla and were maintained in DMEM supplemented with 20% FCS. All cell lines were cultured  
483 in medium containing 100 U/ml penicillin, 100 µg/ml streptomycin and 1 mM L-glutamine.  
484 Cells were incubated at 37 °C in the presence of 5% CO<sub>2</sub>.

485 Recombinant MHV strain A59 (MHV-A59) was derived as described previously [98]. Upon  
486 reaching 70–80% confluence, 17 Cl-1 cells were infected with MHV-A59 at MOI 5 as  
487 described(99,100). Vero CCL81 and Calu3 cells were infected with SARS-CoV-2 (SARS-  
488 CoV-2/human/Switzerland/ZH-UZH-IMV5/2020) at two MOIs (1 and 5) for 24 or 48 h as  
489 previously described [99,100]. Caco2 cells were infected with SARS-CoV-2 (isolate hCoV-  
490 19/Edinburgh/2/2020, a kind gift from Dr Christine Tait-Burkhard and Dr Juergen Haas) at  
491 MOI 0.01 and incubated for 48 h in MEM containing 1% L-glutamine, 1% non-essential  
492 aminoacids, 1% penicillin/streptomycin and supplemented with 2% FBS.

493

494 **Ribosomal profiling and RNASeq data:** 17 Cl-1 cells were grown on 100-mm dishes to 90%  
495 confluency and infected with MHV-A59 at MOI 10. At the indicated time-points, cells were

496 rinsed with 5 ml of ice-cold PBS, flash frozen in a dry ice/ethanol bath and lysed with 400  $\mu$ l  
497 of lysis buffer [20 mM Tris-HCl pH 7.5, 150 mM NaCl, 5 mM MgCl<sub>2</sub>, 1 mM DTT, 1% Triton  
498 X-100, 100  $\mu$ g/ml cycloheximide and 25 U/ml TURBO DNase (Life Technologies)]. The cells  
499 were scraped extensively to ensure lysis, collected and triturated ten times with a 26-G needle.  
500 Cell lysates were clarified by centrifugation at 13,000 g for 20 min at 4 °C. Lysates were  
501 subjected to RiboSeq and RNASeq based on previously reported protocols [7,101]. Ribosomal  
502 RNA was removed using Ribo-Zero Gold rRNA removal kit (Illumina) and library amplicons  
503 were constructed using a small RNA cloning strategy adapted to Illumina smallRNA v2 to  
504 allow multiplexing. Amplicon libraries were deep sequenced using an Illumina NextSeq500  
505 platform. Due to the very large amounts of vRNA produced during infection, mock samples  
506 were processed separately from infected samples to avoid contamination. RiboSeq and  
507 RNASeq sequencing data have been deposited in the ArrayExpress database  
508 (<http://www.ebi.ac.uk/arrayexpress>) under the accession numbers E-MTAB-8650 and E-  
509 MTAB-8651.

510

511 **Computational analysis of RiboSeq and RNASeq data:** Reads were trimmed for adaptor  
512 sequences, filtered for length  $\geq$  25 nt, and reads mapping to *Mus musculus* rRNA (downloaded  
513 from the SILVA database [102] or MHV-A59 viral RNA (GenBank accession AY700211.1)  
514 (with up to 2 mismatches) removed, as previously described [7]. The remaining reads were  
515 aligned directly to the mouse genome (FASTA and GTF gencode release M20, GRCm38,  
516 primary assembly) (with up to 2 mismatches) using STAR (parameters: --outFilterIntronMotifs  
517 RemoveNoncanonicalUnannotated --outMultimapperOrder Random) [103]. Reads on protein-  
518 coding genes were tabulated using htseq-count (version 0.9.1), covering the whole gene for  
519 differential transcription analysis (parameters: -a 0 -m union -s yes -t gene) and just the CDS

520 for the translation efficiency analysis (parameters: -a 0 -m intersection-strict -s yes -t CDS)  
521 [104], using the GTF file from the above Gencode release as the gene feature annotation.

522

523 Differential transcription analysis was performed using DESeq2 (version 1.18.1) [8] and  
524 translation efficiency analysis with Xtail (version 1.1.5) [10]. For each analysis, low count  
525 genes (with fewer than ten counts from all samples combined) were discarded, following which  
526 read counts were normalised by the total number of reads mapping to host mRNA for that  
527 library, using standard DESeq2 normalisation. This minimises the effect of the large amount  
528 of vRNA present in infected samples. Shrinkage of the transcriptional fold changes to reduce  
529 noise in lowly-expressed genes was applied using lfcShrink (parameter: type='normal').

530

531 A given gene was considered to be differentially expressed if the FDR-corrected  $p$  value was  
532 less than 0.05 and the fold change between the means of infected and mock replicates was  
533 greater than two. Volcano plots and transcription versus TE comparison plots were generated  
534 using R and FDR-corrected  $p$  values and  $\log_2(\text{fold change})$  values from the DESeq2 and Xtail  
535 analyses. All reported  $p$  values are corrected for multiple testing by the Benjamini-Hochberg  
536 method. Fold changes plotted in the transcription vs TE comparison are not filtered for  
537 significant  $p$  values before plotting.

538

539 To plot RNASeq and RPF profiles for specific transcripts, reads were mapped to the specified  
540 transcript from the NCBI genome assembly using bowtie [105] allowing two mismatches  
541 (parameters: -v 2, --best). Coordinates for known uORFs were taken from the literature  
542 [11,12,23] and the positions of start and stop codons in all frames determined. Read density  
543 (normalised by total reads mapping to host mRNA for each library, to give reads per million  
544 mapped reads) was calculated at each nucleotide on the transcript and plotted, coloured

545 according to phase. Read positions were offset by +12 nt so that plotted data represent the  
546 inferred position of the ribosomal P site. Bar widths were increased to 12 nt (Fig 1E) or 4 nt  
547 (Supplementary Fig 2) to aid visibility and were plotted sequentially starting from the 5' end  
548 of the transcript.

549

550 **Gene ontology and Reactome pathway enrichment analyses:** Lists of gene IDs of  
551 significantly differentially expressed genes (Supplementary Table 2) were used for GO term  
552 enrichment analysis by the PANTHER web server under the default conditions (release  
553 20190606, GO database released 2019-02-02) [106], against a background list of all the genes  
554 that passed the threshold for inclusion in that expression analysis. For Reactome pathway  
555 enrichment (version 69) [9], the same differentially expressed gene lists were converted to their  
556 human orthologues and analysed, both using the reactome.org web server to determine which  
557 pathways are significantly over-represented (FDR-corrected  $p$  value  $\leq 0.05$ ).

558

559 **Enrichment analysis for eIF2 $\alpha$ -phosphorylation-resistant genes:**

560 Resistance to translational repression by p-eIF2 $\alpha$  is not an existing GO term, so a list of genes  
561 reported to be p-eIF2 $\alpha$ -resistant was constructed based on Andreev et al., 2015 [16] and  
562 references within (excluding those from IRESite, which were not found to be p-eIF2 $\alpha$ -resistant  
563 in their study). Mouse homologues of these genes were identified using the NCBI homogene  
564 database (Supplementary Table 4). Enrichment of genes categorised as p-eIF2 $\alpha$ -resistant  
565 amongst the genes with significantly increased translational efficiency, compared to a  
566 background of all *Mus musculus* genes included in the TE analysis with any GO annotation,  
567 was calculated using a Fisher Exact test.

568

569 **Chemicals:** GSK-2606414 was a kind gift from Dr Edward Emmott and Prof Ian Goodfellow.  
570 AEBSF, STF-083010, ISRIB and tunicamycin were purchased from Sigma-Aldrich. GSK-  
571 2606414, STF-083010, ISRIB and tunicamycin were dissolved in DMSO, whereas AEBSF  
572 was dissolved in water, to the required concentrations. In all experiments, the final  
573 concentration of DMSO did not exceed 0.4%. Cytotoxicity after treatment with single and  
574 combined UPR inhibitors was measured using the Cell Titer Blue (Promega) and trypan blue  
575 exclusion kits (Sigma), following manufacturer's instructions.

576

577 **Antibodies:** The following primary antibodies were used: mouse monoclonal antibodies  
578 against MHV N and S proteins (kind gifts of Dr Helmut Wege, University of Würzburg), mouse  
579 anti-GAPDH (IgM specific, G8795, Sigma-Aldrich), mouse anti-Flag (F3165, Sigma-Aldrich),  
580 rabbit anti-HA (3724, Cell Signaling Technology), rabbit anti-PERK (ab229912, Abcam),  
581 rabbit anti-HERPUD1 (ab150424, Abcam), rabbit anti-GRP78 (BIP, ab108613, Abcam), rabbit  
582 anti-eIF2 $\alpha$  (9722, Cell Signaling Technology), rabbit anti-phospho-eIF2 $\alpha$  (Ser51, 9721, Cell  
583 Signaling Technology), rabbit anti-ATF4 (10835-1-AP, Proteintech), rabbit anti-ATF6  
584 (ab203119 and ab37149, Abcam), mouse anti-S6 (2317, Cell Signaling Technology) and rabbit  
585 RPL10a (ab174318, Abcam). Secondary antibodies used for western blotting were purchased  
586 from Licor: IRDye 800CW Donkey Anti-Mouse IgG (H+L), IRDye 800CW Donkey Anti-  
587 Rabbit IgG (H+L), IRDye 680RD Goat Anti-Mouse IgG (H+L) and IRDye 680RD Goat Anti-  
588 Mouse IgM ( $\mu$  chain specific).

589

590 **Plasmids and transfections:** HEK-293T cells were transiently transfected with pcDNA3.1-  
591 SARS-CoV-2-S-HA (kind gift of Dr Jerome Cattin and Prof Sean Munro, MRC-LMB,  
592 Cambridge, UK), pcDNA6-SARS-CoV-2-N-FLAG, pcDNA6-SARS-CoV-2-ORF3a-FLAG  
593 and pcDNA6-SARS-CoV-2-ORF8-FLAG plasmids (kind gifts of Prof Peihui Wang, Shandong



594 University, China) using a commercial liposome method (TransIT-LT1, Mirus). Transfection  
595 mixtures containing plasmid DNA, serum-free medium (Opti-MEM; Gibco-BRL) and  
596 liposomes were set up as recommended by the manufacturer and added dropwise to the tissue  
597 culture growth medium. Cells were harvested at 24 and 36 h post-transfection.

598

599 **Immunoblotting:** Cells were lysed in 1X Laemmli's sample buffer. After denaturation at 98  
600 °C for 5 minutes, proteins were separated by 12% SDS-PAGE and transferred to nitrocellulose  
601 membranes. These were blocked (5% non-fat milk powder or bovine serum albumin in PBST  
602 [137 mM NaCl, 2.7 mM KCl, 10 mM Na<sub>2</sub>HPO<sub>4</sub>, 1.5 mM KH<sub>2</sub>PO<sub>4</sub>, pH 6.7, and 0.1% Tween  
603 20]) for 30 min at room temperature and probed with specific primary antibodies at 4°C  
604 overnight. Membranes were incubated in the dark with IRDye-conjugated secondary  
605 antibodies diluted to the recommended concentrations in PBST for 1 h at room temperature.  
606 Blots were scanned using an Odyssey Infrared Imaging System (Licor).

607

608 **Analysis of *Xbp1* splicing by RT-PCR:** Total RNA was isolated from infected or transfected  
609 cells as described previously [7], and cDNA synthesised from 500 ng total RNA using M-MLV  
610 Reverse Transcriptase (Promega). Mouse or human *Xbp1* and *Rpl19* were amplified using  
611 specific primers (Supplementary Table 5). Following PCR reactions, the resulting amplicons  
612 were subjected to electrophoresis in 3% agarose gels.

613

614 **Quantitative real-time PCR assays:** Relative levels of mouse or human *Bip*, *Chop*, *Gadd34*,  
615 *Calreticulin* and *Grp94* in cDNA samples were determined by quantitative real-time PCR  
616 (qPCR) using a Rotor-Gene 3000 (Corbett Research). Reactions were performed in a final  
617 volume of 20 µl containing Hot Start Taq (1 U, QIAGEN), 3.5 mM MgCl<sub>2</sub>, 2.5 mM  
618 deoxynucleotides, 450 nM SYBR Green dye, 500 nM relevant forward and reverse primers

619 (Supplementary Table 5) and 1  $\mu$ l of cDNA. No-template controls were included for each  
620 primer pair, and each qPCR reaction was carried out in duplicate. Fold changes in gene  
621 expression relative to the mock were calculated by the delta delta-cycle threshold ( $\Delta\Delta$ Ct)  
622 method, and *Rpl19* was used as a normalising housekeeping gene.

623

624 **Polysome profiling:** 17 Cl-1 cells were infected as described above. 10 min prior to harvesting,  
625 cells were treated with cycloheximide (100  $\mu$ g/ml), washed with PBS and lysed in a buffer  
626 containing 20 mM Tris HCl pH 7.5, 100 mM KCl, 5 mM MgOAc, 0.375 mM CHX, 1 mM  
627 DTT, 0.1 mM PMSF, 2 U/ $\mu$ l DNase I, 0.5% NP-40, supplemented with protease and  
628 phosphatase inhibitors (ThermoFisher Scientific). Following trituration with a 26-G needle (ten  
629 passes), lysates were cleared (13,000 g at 4 °C for 20 min) and the supernatants layered onto  
630 12 ml sucrose density gradients (10–50% sucrose in TMK buffer: 20 mM Tris-HCl pH 7.5,  
631 100 mM KCl, 5 mM MgCl<sub>2</sub>) prepared in Beckman SW41 polypropylene tubes using a Gradient  
632 Master (Biocomp). Following centrifugation (200,000 g for 90 min at 4 °C), fractions were  
633 prepared using an ISCO fractionator monitoring absorbance at 254 nm. Proteins were  
634 concentrated from fractions using methanol-chloroform extraction and subjected to  
635 immunoblotting analysis. Polysome profiling in higher salt conditions was carried out as  
636 described above except that the lysis buffer and sucrose density gradient contained 400 mM  
637 KCl.

638

639 **Virus plaque assays:** To determine MHV-A59 titres by plaque assay, 17 Cl-1 cells in 6-well  
640 plates were infected with 400  $\mu$ l of 10-fold serial dilutions of sample in infection medium  
641 (Hank's balanced salt solution containing 50  $\mu$ g/ml DEAE-dextran and 0.2% bovine serum  
642 albumin - BSA). After 45 min at 37°C with regular rocking, the inoculum was removed and  
643 replaced with a 1:1 mixture of 2.4% Avicel and MEM 2X medium (20% MEM 10X, 2% non-

644 essential aminoacids, 200 U/ml penicillin, 200 µg/ml streptomycin, 2 mM L-glutamine, 40 mM  
645 HEPES pH 6.8, 10% tryptose phosphate broth, 10% FCS and 0.01% sodium bicarbonate).  
646 Plates were incubated at 37 °C for 48 h prior to fixing with 3.7% formaldehyde in PBS. Cell  
647 monolayers were stained with 0.1% toluidine blue to visualise plaques. SARS-CoV-2 plaque  
648 assays were performed as previously described [99]). Experiments were conducted using three  
649 biological repeats.

650

651 **TCID<sub>50</sub> assays:** SARS-CoV-2 replication was assessed using a 50% tissue culture infective  
652 dose (TCID<sub>50</sub>) assay in Vero E6 cells. Supernatant derived from infected Caco2 cells was  
653 subjected to 10-fold serial dilutions. At 72 h p.i., cells were fixed and stained as previously  
654 indicated. Wells showing any sign of cytopathic effect (CPE) were scored as positive.

655

656 **Statistical analysis of virus titre results:** Data were analysed in GraphPad Prism 9.0  
657 (GraphPad software, San Diego, CA, USA). Values represent mean ± standard deviation.  
658 Statistical significance was evaluated using two-tailed *t*-tests on log<sub>10</sub>(virus titre) data, which  
659 did not assume equal variances for the two populations being compared, to calculate the *p*-  
660 values. Differences as compared to the control with *p* value ≤ 0.05 were considered as  
661 statistically significant, with \**p* < 0.05, \*\* *p* < 0.01, \*\*\* *p* < 0.001 and \*\*\*\* *p* < 0.0001.

662

### 663 **Acknowledgements**

664 SK, ND, GD and EB would like to acknowledge Dr Holly Shelton, Dr Isabelle Dietrich and Dr  
665 Christine Reitmayer for their supervision in the CL3 suite, and Dr Christine Tait-Burkhard and  
666 Dr Juergen Haas for the SARS-CoV-2 isolate.

667

668 NI would like to thank Dr James Edgar for providing SARS-CoV-2 plasmids.

669

670 NI would like to thank Dr Luke Meredith and Prof Ian Goodfellow for providing pcDNA3.1-

671 ACE2, pcDNA3.1-TMPRSS2, pMD2-VSV-G and pNL4.3-Luc plasmids for pseudotyped

672 virions.

673

## 674 **References**

- 675 1. Channappanavar R, Perlman S. Pathogenic human coronavirus infections: causes and  
676 consequences of cytokine storm and immunopathology. *Seminars in Immunopathology*. 2017  
677 Jul 2;39(5).
- 678 2. Zhou P, Yang X-L, Wang X-G, Hu B, Zhang L, Zhang W, et al. A pneumonia outbreak  
679 associated with a new coronavirus of probable bat origin. *Nature*. 2020 Mar 12;579(7798).
- 680 3. Zhu N, Zhang D, Wang W, Li X, Yang B, Song J, et al. A Novel Coronavirus from Patients  
681 with Pneumonia in China, 2019. *New England Journal of Medicine*. 2020 Feb 20;382(8).
- 682 4. Fung TS, Liu DX. Coronavirus infection, ER stress, apoptosis and innate immunity. *Frontiers*  
683 *in Microbiology*. 2014 Jun 17;5.
- 684 5. Ron D, Walter P. Signal integration in the endoplasmic reticulum unfolded protein response.  
685 *Nature Reviews Molecular Cell Biology*. 2007 Jul;8(7).
- 686 6. Ingolia NT, Ghaemmaghami S, Newman JRS, Weissman JS. Genome-Wide Analysis in Vivo  
687 of Translation with Nucleotide Resolution Using Ribosome Profiling. *Science*. 2009 Apr  
688 10;324(5924).
- 689 7. Irigoyen N, Firth AE, Jones JD, Chung BY-W, Siddell SG, Brierley I. High-Resolution Analysis  
690 of Coronavirus Gene Expression by RNA Sequencing and Ribosome Profiling. *PLOS*  
691 *Pathogens*. 2016 Feb 26;12(2).
- 692 8. Love MI, Huber W, Anders S. Moderated estimation of fold change and dispersion for RNA-  
693 seq data with DESeq2. *Genome Biology*. 2014 Dec 5;15(12).
- 694 9. Fabregat A, Sidiropoulos K, Viteri G, Forner O, Marin-Garcia P, Arnau V, et al. Reactome  
695 pathway analysis: a high-performance in-memory approach. *BMC Bioinformatics*. 2017 Dec  
696 2;18(1).
- 697 10. Xiao Z, Zou Q, Liu Y, Yang X. Genome-wide assessment of differential translations with  
698 ribosome profiling data. *Nature Communications*. 2016 Sep 4;7(1).
- 699 11. Lu PD, Harding HP, Ron D. Translation reinitiation at alternative open reading frames regulates  
700 gene expression in an integrated stress response. *Journal of Cell Biology*. 2004 Oct 11;167(1).
- 701 12. Vattem KM, Wek RC. Reinitiation involving upstream ORFs regulates ATF4 mRNA  
702 translation in mammalian cells. *Proceedings of the National Academy of Sciences*. 2004 Aug  
703 3;101(31).
- 704 13. Watatani Y, Ichikawa K, Nakanishi N, Fujimoto M, Takeda H, Kimura N, et al. Stress-induced  
705 Translation of ATF5 mRNA Is Regulated by the 5'-Untranslated Region. *Journal of Biological*  
706 *Chemistry*. 2008 Feb 1;283(5).
- 707 14. Zhou D, Palam LR, Jiang L, Narasimhan J, Staschke KA, Wek RC. Phosphorylation of eIF2  
708 Directs ATF5 Translational Control in Response to Diverse Stress Conditions. *Journal of*  
709 *Biological Chemistry*. 2008 Mar 14;283(11).
- 710 15. Palam LR, Baird TD, Wek RC. Phosphorylation of eIF2 Facilitates Ribosomal Bypass of an  
711 Inhibitory Upstream ORF to Enhance CHOP Translation. *Journal of Biological Chemistry*. 2011  
712 Apr 1;286(13).
- 713 16. Andreev DE, O'Connor PB, Fahey C, Kenny EM, Terenin IM, Dmitriev SE, et al. Translation  
714 of 5' leaders is pervasive in genes resistant to eIF2 repression. *eLife*. 2015 Jan 26;4.
- 715 17. Brush MH, Weiser DC, Shenolikar S. Growth Arrest and DNA Damage-Inducible Protein  
716 GADD34 Targets Protein Phosphatase 1 $\alpha$  to the Endoplasmic Reticulum and Promotes

- 717 Dephosphorylation of the  $\alpha$  Subunit of Eukaryotic Translation Initiation Factor 2. *Molecular and*  
718 *Cellular Biology*. 2003 Feb 15;23(4).
- 719 18. Novoa I, Zeng H, Harding HP, Ron D. Feedback Inhibition of the Unfolded Protein Response  
720 by GADD34-Mediated Dephosphorylation of eIF2 $\alpha$ . *Journal of Cell Biology*. 2001 May  
721 28;153(5).
- 722 19. Lee Y-Y, Cevallos RC, Jan E. An Upstream Open Reading Frame Regulates Translation of  
723 GADD34 during Cellular Stresses That Induce eIF2 $\alpha$  Phosphorylation. *Journal of Biological*  
724 *Chemistry*. 2009 Mar 13;284(11).
- 725 20. Mungrue IN, Pagnon J, Kohannim O, Gargalovic PS, Lusic AJ. CHAC1/MGC4504 Is a Novel  
726 Proapoptotic Component of the Unfolded Protein Response, Downstream of the ATF4-ATF3-  
727 CHOP Cascade. *The Journal of Immunology*. 2009 Jan 1;182(1).
- 728 21. Yamamoto K. Differential Contributions of ATF6 and XBP1 to the Activation of Endoplasmic  
729 Reticulum Stress-Responsive cis-Acting Elements ERSE, UPRE and ERSE-II. *Journal of*  
730 *Biochemistry*. 2004 Sep 1;136(3).
- 731 22. Baumeister P, Luo S, Skarnes WC, Sui G, Seto E, Shi Y, et al. Endoplasmic Reticulum Stress  
732 Induction of the Grp78/BiP Promoter: Activating Mechanisms Mediated by YY1 and Its  
733 Interactive Chromatin Modifiers. *Molecular and Cellular Biology*. 2005 Jun 1;25(11).
- 734 23. Yoshida H, Matsui T, Yamamoto A, Okada T, Mori K. XBP1 mRNA Is Induced by ATF6 and  
735 Spliced by IRE1 in Response to ER Stress to Produce a Highly Active Transcription Factor.  
736 *Cell*. 2001 Dec;107(7).
- 737 24. Nishitoh H. CHOP is a multifunctional transcription factor in the ER stress response. *Journal*  
738 *of Biochemistry*. 2012 Mar 1;151(3).
- 739 25. Ma Y, Hendershot LM. Delineation of a Negative Feedback Regulatory Loop That Controls  
740 Protein Translation during Endoplasmic Reticulum Stress. *Journal of Biological Chemistry*.  
741 2003 Sep 12;278(37).
- 742 26. Bechill J, Chen Z, Brewer JW, Baker SC. Coronavirus Infection Modulates the Unfolded  
743 Protein Response and Mediates Sustained Translational Repression. *Journal of Virology*. 2008  
744 May 1;82(9).
- 745 27. Jiang X-S, Tang L-Y, Dai J, Zhou H, Li S-J, Xia Q-C, et al. Quantitative Analysis of Severe  
746 Acute Respiratory Syndrome (SARS)-associated Coronavirus-infected Cells Using Proteomic  
747 Approaches. *Molecular & Cellular Proteomics*. 2005 Jul;4(7).
- 748 28. Versteeg GA, van de Nes PS, Bredenbeek PJ, Spaan WJM. The Coronavirus Spike Protein  
749 Induces Endoplasmic Reticulum Stress and Upregulation of Intracellular Chemokine mRNA  
750 Concentrations. *Journal of Virology*. 2007 Oct 15;81(20).
- 751 29. Yeung Y-S, Yip C-W, Hon C-C, Chow KYC, Ma ICM, Zeng F, et al. Transcriptional profiling  
752 of Vero E6 cells over-expressing SARS-CoV S2 subunit: Insights on viral regulation of  
753 apoptosis and proliferation. *Virology*. 2008 Feb;371(1).
- 754 30. Shaban MS, Müller C, Mayr-Buro C, Weiser H, Albert BV, Weber A, et al. Inhibiting  
755 coronavirus replication in cultured cells by chemical ER stress. *bioRxiv [Preprint]*. 2020.  
756 Available from: <https://www.biorxiv.org/content/10.1101/2020.08.26.266304v1.full>
- 757 31. Harding HP, Zhang Y, Ron D. Protein translation and folding are coupled by an endoplasmic-  
758 reticulum-resident kinase. *Nature*. 1999 Jan 21;397(6716).
- 759 32. Harding HP, Zhang Y, Bertolotti A, Zeng H, Ron D. Perk Is Essential for Translational  
760 Regulation and Cell Survival during the Unfolded Protein Response. *Molecular Cell*. 2000  
761 May;5(5).
- 762 33. Lu PD, Harding HP, Ron D. Translation reinitiation at alternative open reading frames regulates  
763 gene expression in an integrated stress response. *Journal of Cell Biology*. 2004 Oct 11;167(1).
- 764 34. Harding HP, Novoa I, Zhang Y, Zeng H, Wek R, Schapira M, et al. Regulated Translation  
765 Initiation Controls Stress-Induced Gene Expression in Mammalian Cells. *Molecular Cell*. 2000  
766 Nov;6(5).
- 767 35. Calton M, Zeng H, Urano F, Till JH, Hubbard SR, Harding HP, et al. IRE1 couples endoplasmic  
768 reticulum load to secretory capacity by processing the XBP-1 mRNA. *Nature*. 2002 Jan  
769 3;415(6867).



- 770 36. Ye J, Rawson RB, Komuro R, Chen X, Davé UP, Prywes R, et al. ER Stress Induces Cleavage  
771 of Membrane-Bound ATF6 by the Same Proteases that Process SREBPs. *Molecular Cell*. 2000  
772 Dec;6(6).
- 773 37. Haze K, Yoshida H, Yanagi H, Yura T, Mori K. Mammalian Transcription Factor ATF6 Is  
774 Synthesized as a Transmembrane Protein and Activated by Proteolysis in Response to  
775 Endoplasmic Reticulum Stress. *Molecular Biology of the Cell*. 1999 Nov;10(11).
- 776 38. Bommasamy H, Back SH, Fagone P, Lee K, Meshinchi S, Vink E, et al. ATF6 induces XBP1-  
777 independent expansion of the endoplasmic reticulum. *Journal of Cell Science*. 2009 May  
778 15;122(10).
- 779 39. Lee A-H, Iwakoshi NN, Glimcher LH. XBP-1 Regulates a Subset of Endoplasmic Reticulum  
780 Resident Chaperone Genes in the Unfolded Protein Response. *Molecular and Cellular Biology*.  
781 2003 Nov 1;23(21).
- 782 40. Luo S, Baumeister P, Yang S, Abcouwer SF, Lee AS. Induction of Grp78/BiP by Translational  
783 Block. *Journal of Biological Chemistry*. 2003 Sep 26;278(39).
- 784 41. Gao P, Chai Y, Song J, Liu T, Chen P, Zhou L, et al. Reprogramming the unfolded protein  
785 response for replication by porcine reproductive and respiratory syndrome virus. *PLOS*  
786 *Pathogens*. 2019 Nov 18;15(11).
- 787 42. Axten JM, Medina JR, Feng Y, Shu A, Romeril SP, Grant SW, et al. Discovery of 7-Methyl-5-  
788 (1-{[3-(trifluoromethyl)phenyl]acetyl}-2,3-dihydro-1*H*-indol-5-yl)-7*H*-pyrrolo[2,3-*d*  
789 ]pyrimidin-4-amine (GSK2606414), a Potent and Selective First-in-Class Inhibitor of Protein  
790 Kinase R (PKR)-like Endoplasmic Reticulum Kinase (PERK). *Journal of Medicinal Chemistry*.  
791 2012 Aug 23;55(16).
- 792 43. Harding HP, Zyryanova AF, Ron D. Uncoupling Proteostasis and Development *in Vitro* with a  
793 Small Molecule Inhibitor of the Pancreatic Endoplasmic Reticulum Kinase, PERK. *Journal of*  
794 *Biological Chemistry*. 2012 Dec 28;287(53).
- 795 44. Zyryanova AF, Kashiwagi K, Rato C, Harding HP, Crespillo-Casado A, Perera LA, et al. ISRIB  
796 Blunts the Integrated Stress Response by Allosterically Antagonising the Inhibitory Effect of  
797 Phosphorylated eIF2 on eIF2B. *Molecular Cell*. 2020 Nov;
- 798 45. Papandreou I, Denko NC, Olson M, van Melckebeke H, Lust S, Tam A, et al. Identification of  
799 an Ire1alpha endonuclease specific inhibitor with cytotoxic activity against human multiple  
800 myeloma. *Blood*. 2011 Jan 27;117(4).
- 801 46. Okada T, Haze K, Nadanaka S, Yoshida H, Seidah NG, Hirano Y, et al. A Serine Protease  
802 Inhibitor Prevents Endoplasmic Reticulum Stress-induced Cleavage but Not Transport of the  
803 Membrane-bound Transcription Factor ATF6. *Journal of Biological Chemistry*. 2003 Aug  
804 15;278(33).
- 805 47. Chan C-P, Siu K-L, Chin K-T, Yuen K-Y, Zheng B, Jin D-Y. Modulation of the Unfolded  
806 Protein Response by the Severe Acute Respiratory Syndrome Coronavirus Spike Protein.  
807 *Journal of Virology*. 2006 Sep 15;80(18).
- 808 48. Minakshi R, Padhan K, Rani M, Khan N, Ahmad F, Jameel S. The SARS Coronavirus 3a  
809 Protein Causes Endoplasmic Reticulum Stress and Induces Ligand-Independent  
810 Downregulation of the Type 1 Interferon Receptor. *PLoS ONE*. 2009 Dec 17;4(12).
- 811 49. Sung S-C, Chao C-Y, Jeng K-S, Yang J-Y, Lai MMC. The 8ab protein of SARS-CoV is a  
812 luminal ER membrane-associated protein and induces the activation of ATF6. *Virology*. 2009  
813 May;387(2).
- 814 50. Barez SR, Atar AM, Aghaei M. Mechanism of inositol-requiring enzyme 1-alpha inhibition in  
815 endoplasmic reticulum stress and apoptosis in ovarian cancer cells. *Journal of Cell*  
816 *Communication and Signaling*. 2020 Dec 21;14(4).
- 817 51. Lamers MM, Beumer J, van der Vaart J, Knoop K, Puschhof J, Breugem TI, et al. SARS-CoV-  
818 2 productively infects human gut enterocytes. *Science*. 2020 Jul 3;369(6499).
- 819 52. Chu H, Chan JF-W, Yuen TT-T, Shuai H, Yuan S, Wang Y, et al. Comparative tropism,  
820 replication kinetics, and cell damage profiling of SARS-CoV-2 and SARS-CoV with  
821 implications for clinical manifestations, transmissibility, and laboratory studies of COVID-19:  
822 an observational study. *The Lancet Microbe*. 2020 May;1(1).

- 823 53. Hoffmann M, Kleine-Weber H, Schroeder S, Krüger N, Herrler T, Erichsen S, et al. SARS-  
824 CoV-2 Cell Entry Depends on ACE2 and TMPRSS2 and Is Blocked by a Clinically Proven  
825 Protease Inhibitor. *Cell*. 2020 Apr;181(2).
- 826 54. Azouz NP, Klingler AM, Rothenberg ME. Alpha 1 antitrypsin is an inhibitor of the SARS-CoV-  
827 2 priming protease TMPRSS2. *bioRxiv* [Preprint]. 2020. Available from:  
828 <https://www.biorxiv.org/content/10.1101/2020.05.04.077826v2>
- 829 55. Shen LW, Mao HJ, Wu YL, Tanaka Y, Zhang W. TMPRSS2: A potential target for treatment  
830 of influenza virus and coronavirus infections. *Biochimie*. 2017 Nov;142.
- 831 56. Daly JL, Simonetti B, Klein K, Chen K-E, Williamson MK, Antón-Plágaro C, et al. Neuropilin-  
832 1 is a host factor for SARS-CoV-2 infection. *Science*. 2020 Nov 13;370(6518).
- 833 57. Grenga L, Gallais F, Pible O, Gaillard J-C, Gouveia D, Batina H, et al. Shotgun proteomics  
834 analysis of SARS-CoV-2-infected cells and how it can optimize whole viral particle antigen  
835 production for vaccines. *Emerging Microbes & Infections*. 2020 Jan 1;9(1).
- 836 58. Appelberg S, Gupta S, Svensson Akusjärvi S, Ambikan AT, Mikaeloff F, Saccon E, et al.  
837 Dysregulation in Akt/mTOR/HIF-1 signaling identified by proteo-transcriptomics of SARS-  
838 CoV-2 infected cells. *Emerging Microbes & Infections*. 2020 Jan 1;9(1).
- 839 59. Stukalov A, Girault V, Grass V, Bergant V, Karayel O, Urban C, et al. Multi-level proteomics  
840 reveals host-perturbation strategies of SARS-CoV-2 and SARS-CoV. *bioRxiv* [Preprint]. 2020.  
841 Available from: <https://www.biorxiv.org/content/10.1101/2020.06.17.156455v1>
- 842 60. Gill SE, dos Santos CC, O’Gorman DB, Carter DE, Patterson EK, Slessarev M, et al.  
843 Transcriptional profiling of leukocytes in critically ill COVID19 patients: implications for  
844 interferon response and coagulation. *Intensive Care Medicine Experimental*. 2020 Dec 11;8(1).
- 845 61. Gordon DE, Jang GM, Bouhaddou M, Xu J, Obernier K, White KM, et al. A SARS-CoV-2  
846 protein interaction map reveals targets for drug repurposing. *Nature*. 2020 Jul 30;583(7816).
- 847 62. Li J, Guo M, Tian X, Wang X, Yang X, Wu P, et al. Virus-Host Interactome and Proteomic  
848 Survey Reveal Potential Virulence Factors Influencing SARS-CoV-2 Pathogenesis. *Med*. 2020  
849 Jul;
- 850 63. Cruz JLG, Sola I, Becares M, Alberca B, Plana J, Enjuanes L, et al. Coronavirus Gene 7  
851 Counteracts Host Defenses and Modulates Virus Virulence. *PLoS Pathogens*. 2011 Jun 9;7(6).
- 852 64. V’kovski P, Gerber M, Kelly J, Pfaender S, Ebert N, Braga Lagache S, et al. Determination of  
853 host proteins composing the microenvironment of coronavirus replicase complexes by  
854 proximity-labeling. *eLife*. 2019 Jan 11;8.
- 855 65. Chu H, Chan C-M, Zhang X, Wang Y, Yuan S, Zhou J, et al. Middle East respiratory syndrome  
856 coronavirus and bat coronavirus HKU9 both can utilize GRP78 for attachment onto host cells.  
857 *Journal of Biological Chemistry*. 2018 Jul 27;293(30).
- 858 66. Siu K-L, Chan C-P, Kok K-H, Woo PC-Y, Jin D-Y. Comparative analysis of the activation of  
859 unfolded protein response by spike proteins of severe acute respiratory syndrome coronavirus  
860 and human coronavirus HKU1. *Cell & Bioscience*. 2014;4(1).
- 861 67. Li S, Yuan L, Dai G, Chen RA, Liu DX, Fung TS. Regulation of the ER Stress Response by  
862 the Ion Channel Activity of the Infectious Bronchitis Coronavirus Envelope Protein Modulates  
863 Virion Release, Apoptosis, Viral Fitness, and Pathogenesis. *Frontiers in Microbiology*. 2020 Jan  
864 24;10.
- 865 68. Xue M, Fu F, Ma Y, Zhang X, Li L, Feng L, et al. The PERK Arm of the Unfolded Protein  
866 Response Negatively Regulates Transmissible Gastroenteritis Virus Replication by Suppressing  
867 Protein Translation and Promoting Type I Interferon Production. *Journal of Virology*. 2018 May  
868 16;92(15).
- 869 69. Wang X, Liao Y, Yap PL, Png KJ, Tam JP, Liu DX. Inhibition of Protein Kinase R Activation  
870 and Upregulation of GADD34 Expression Play a Synergistic Role in Facilitating Coronavirus  
871 Replication by Maintaining De Novo Protein Synthesis in Virus-Infected Cells. *Journal of*  
872 *Virology*. 2009 Dec 1;83(23).
- 873 70. Liao Y, Fung TS, Huang M, Fang SG, Zhong Y, Liu DX. Upregulation of CHOP/GADD153  
874 during Coronavirus Infectious Bronchitis Virus Infection Modulates Apoptosis by Restricting  
875 Activation of the Extracellular Signal-Regulated Kinase Pathway. *Journal of Virology*. 2013 Jul  
876 15;87(14).

- 877 71. DeDiego ML, Nieto-Torres JL, Jiménez-Guardeño JM, Regla-Nava JA, Álvarez E, Oliveros  
878 JC, et al. Severe Acute Respiratory Syndrome Coronavirus Envelope Protein Regulates Cell  
879 Stress Response and Apoptosis. *PLoS Pathogens*. 2011 Oct 20;7(10).
- 880 72. Krähling V, Stein DA, Spiegel M, Weber F, Mühlberger E. Severe Acute Respiratory Syndrome  
881 Coronavirus Triggers Apoptosis via Protein Kinase R but Is Resistant to Its Antiviral Activity.  
882 *Journal of Virology*. 2009 Mar 1;83(5).
- 883 73. Ye Z, Wong CK, Li P, Xie Y. A SARS-CoV protein, ORF-6, induces caspase-3 mediated, ER  
884 stress and JNK-dependent apoptosis. *Biochimica et Biophysica Acta (BBA) - General Subjects*.  
885 2008 Dec;1780(12).
- 886 74. Shi C-S, Nabar NR, Huang N-N, Kehrl JH. SARS-Coronavirus Open Reading Frame-8b  
887 triggers intracellular stress pathways and activates NLRP3 inflammasomes. *Cell Death*  
888 *Discovery*. 2019 Dec 5;5(1).
- 889 75. Chen C-Y, Ping Y-H, Lee H-C, Chen K-H, Lee Y-M, Chan Y-J, et al. Open Reading Frame 8a  
890 of the Human Severe Acute Respiratory Syndrome Coronavirus Not Only Promotes Viral  
891 Replication but Also Induces Apoptosis. *The Journal of Infectious Diseases*. 2007 Aug 1;196(3).
- 892 76. Chan JF-W, Kok K-H, Zhu Z, Chu H, To KK-W, Yuan S, et al. Genomic characterization of  
893 the 2019 novel human-pathogenic coronavirus isolated from a patient with atypical pneumonia  
894 after visiting Wuhan. *Emerging Microbes & Infections*. 2020 Jan 1;9(1).
- 895 77. Young BE, Fong S-W, Chan Y-H, Mak T-M, Ang LW, Anderson DE, et al. Effects of a major  
896 deletion in the SARS-CoV-2 genome on the severity of infection and the inflammatory response:  
897 an observational cohort study. *The Lancet*. 2020 Aug;396(10251).
- 898 78. Su YCF, Anderson DE, Young BE, Linster M, Zhu F, Jayakumar J, et al. Discovery and  
899 Genomic Characterization of a 382-Nucleotide Deletion in ORF7b and ORF8 during the Early  
900 Evolution of SARS-CoV-2. *mBio*. 2020 Jul 21;11(4).
- 901 79. Gong Y-N, Tsao K-C, Hsiao M-J, Huang C-G, Huang P-N, Huang P-W, et al. SARS-CoV-2  
902 genomic surveillance in Taiwan revealed novel ORF8-deletion mutant and clade possibly  
903 associated with infections in Middle East. *Emerging Microbes & Infections*. 2020 Jan 1;9(1).
- 904 80. Muth D, Corman VM, Roth H, Binger T, Dijkman R, Gottula LT, et al. Attenuation of  
905 replication by a 29 nucleotide deletion in SARS-coronavirus acquired during the early stages of  
906 human-to-human transmission. *Scientific Reports*. 2018 Dec 11;8(1).
- 907 81. Nakabo Y, Pabst MJ. Lysis of leukemic cells by human macrophages: inhibition by 4-(2-  
908 aminoethyl)-benzenesulfonyl fluoride (AEBSF), a serine protease inhibitor. *Journal of*  
909 *Leukocyte Biology*. 1996 Sep;60(3).
- 910 82. Barua S, Kim JY, Yenari MA, Lee JE. The role of NOX inhibitors in neurodegenerative  
911 diseases. *IBRO Reports*. 2019 Dec;7.
- 912 83. Thamsen M, Ghosh R, Auyeung VC, Brumwell A, Chapman HA, Backes BJ, et al. Small  
913 molecule inhibition of IRE1 $\alpha$  kinase/RNase has anti-fibrotic effects in the lung. *PLOS ONE*.  
914 2019 Jan 9;14(1).
- 915 84. Wang X, Xu M, Frank JA, Ke Z, Luo J. Thiamine deficiency induces endoplasmic reticulum  
916 stress and oxidative stress in human neurons derived from induced pluripotent stem cells.  
917 *Toxicology and Applied Pharmacology*. 2017 Apr;320.
- 918 85. Chien W, Ding L-W, Sun Q-Y, Torres-Fernandez LA, Tan SZ, Xiao J, et al. Selective inhibition  
919 of unfolded protein response induces apoptosis in pancreatic cancer cells. *Oncotarget*. 2014 Jul  
920 15;5(13).
- 921 86. Bradley KL, Stokes CA, Marciniak SJ, Parker LC, Condliffe AM. Role of unfolded proteins in  
922 lung disease. *Thorax*. 2020 Oct 19.
- 923 87. Sureda A, Alizadeh J, Nabavi SF, Berindan-Neagoe I, Cismaru CA, Jeandet P, et al.  
924 Endoplasmic reticulum as a potential therapeutic target for covid-19 infection management?  
925 *European Journal of Pharmacology*. 2020 Sep;882.
- 926 88. Aoe T. Pathological Aspects of COVID-19 as a Conformational Disease and the Use of  
927 Pharmacological Chaperones as a Potential Therapeutic Strategy. *Frontiers in Pharmacology*.  
928 2020 Jul 10;11.
- 929 89. Cimellaro A, Perticone M, Fiorentino TV, Sciacqua A, Hribal ML. Role of endoplasmic  
930 reticulum stress in endothelial dysfunction. *Nutrition, Metabolism and Cardiovascular Diseases*.  
931 2016 Oct;26(10).



- 932 90. Lenna S, Han R, Trojanowska M. Endoplasmic reticulum stress and endothelial dysfunction.  
933 IUBMB Life. 2014 Aug;66(8).
- 934 91. Varga Z, Flammer AJ, Steiger P, Haberecker M, Andermatt R, Zinkernagel AS, et al.  
935 Endothelial cell infection and endotheliitis in COVID-19. *The Lancet*. 2020 May;395(10234).
- 936 92. Grasselli G, Tonetti T, Protti A, Langer T, Girardis M, Bellani G, et al. Pathophysiology of  
937 COVID-19-associated acute respiratory distress syndrome: a multicentre prospective  
938 observational study. *The Lancet Respiratory Medicine*. 2020 Dec;8(12).
- 939 93. Yang X, Yu Y, Xu J, Shu H, Xia J, Liu H, et al. Clinical course and outcomes of critically ill  
940 patients with SARS-CoV-2 pneumonia in Wuhan, China: a single-centered, retrospective,  
941 observational study. *The Lancet Respiratory Medicine*. 2020 May;8(5).
- 942 94. Gavriilaki E, Anyfanti P, Gavriilaki M, Lazaridis A, Douma S, Gkaliagkousi E. Endothelial  
943 Dysfunction in COVID-19: Lessons Learned from Coronaviruses. *Current Hypertension*  
944 *Reports*. 2020 Sep 27;22(9).
- 945 95. Grillo F, Barisione E, Ball L, Mastracci L, Fiocca R. Lung fibrosis: an undervalued finding in  
946 COVID-19 pathological series. *The Lancet Infectious Diseases*. 2020 Jul.
- 947 96. Huang W, Wu Q, Chen Z, Xiong Z, Wang K, Tian J, et al. The potential indicators for  
948 pulmonary fibrosis in survivors of severe COVID-19. *Journal of Infection*. 2020 Sep.
- 949 97. Burman A, Tanjore H, Blackwell TS. Endoplasmic reticulum stress in pulmonary fibrosis.  
950 *Matrix Biology*. 2018 Aug;68–69.
- 951 98. Sturman LS, Takemoto KK. Enhanced Growth of a Murine Coronavirus in Transformed Mouse  
952 Cells. *Infection and Immunity*. 1972;6(4).
- 953 99. Busnadiago I, Fernbach S, Pohl MO, Karakus U, Huber M, Trkola A, et al. Antiviral Activity  
954 of Type I, II, and III Interferons Counterbalances ACE2 Inducibility and Restricts SARS-CoV-  
955 2. *mBio*. 2020 Sep 10;11(5).
- 956 100. Pohl MO, Busnadiago I, Kufner V, Schmutz S, Zaheri M, Abela I, et al. Distinct Phenotypes  
957 of SARS-CoV-2 isolates reveal viral traits critical for replication in primary human respiratory  
958 cells. *bioRxiv* [Preprint]. 2020. Available from:  
959 <https://www.biorxiv.org/content/10.1101/2020.10.22.350207v1>
- 960 101. Chung BY, Hardcastle TJ, Jones JD, Irigoyen N, Firth AE, Baulcombe DC, et al. The use of  
961 duplex-specific nuclease in ribosome profiling and a user-friendly software package for Ribo-  
962 seq data analysis. *RNA*. 2015 Oct;21(10).
- 963 102. Quast C, Pruesse E, Yilmaz P, Gerken J, Schweer T, Yarza P, et al. The SILVA ribosomal  
964 RNA gene database project: improved data processing and web-based tools. *Nucleic Acids*  
965 *Research*. 2012 Nov 27;41(D1).
- 966 103. Dobin A, Davis CA, Schlesinger F, Drenkow J, Zaleski C, Jha S, et al. STAR: ultrafast  
967 universal RNA-seq aligner. *Bioinformatics*. 2013 Jan;29(1).
- 968 104. Anders S, Pyl PT, Huber W. HTSeq—a Python framework to work with high-throughput  
969 sequencing data. *Bioinformatics*. 2015 Jan 15;31(2).
- 970 105. Langmead B, Trapnell C, Pop M, Salzberg SL. Ultrafast and memory-efficient alignment of  
971 short DNA sequences to the human genome. *Genome Biology*. 2009;10(3).
- 972 106. Mi H, Muruganujan A, Huang X, Ebert D, Mills C, Guo X, et al. Protocol Update for large-  
973 scale genome and gene function analysis with the PANTHER classification system (v.14.0).  
974 *Nature Protocols*. 2019 Mar 25;14(3).
- 975

976  
977  
978

979 **Figure Captions:**

980

981 **Figure 1: Ribosome profiling reveals the unfolded protein response as a key pathway in**

982 **the host response to MHV-A59 infection. (A)** Schematic of the three branches of the UPR

983 (IRE1 $\alpha$ , ATF6, and PERK). ERAD = ER-associated protein degradation. **(B)** Top five most

984 significantly enriched Reactome pathways<sup>9</sup> associated with the lists of transcriptionally up-

985 regulated genes (orange triangles pointing upwards) and transcriptionally down-regulated

986 genes (blue triangles pointing downwards), plotted according to the false discovery rate (FDR)-

987 corrected  $p$  value of the enrichment. Full results, including pathway IDs, are in Supplementary

988 Table 3. **(C)** Volcano plot showing the relative change in abundance of cellular transcripts and

989 the FDR-corrected  $p$  value for differential expression between the mock and infected samples

990 ( $n=2$  biological replicates). Grey vertical lines indicate a transcript abundance fold change of

991 2. Genes which have fold changes greater than this threshold and a  $p \leq 0.05$  value of less than

992 0.05 are considered significantly differentially expressed and coloured orange if up-regulated

993 and blue if down-regulated. Selected genes are annotated in red. **(D)** Volcano plot showing the

994 relative change in translation efficiency of cellular transcripts, and the FDR-corrected  $p$  value,

995 between the mock and infected samples ( $n=2$  biological replicates). Colours and fold change

996 and  $p$  value thresholds as in C. **(E)** Analysis of RPFs mapping to *Atf4* (NCBI RefSeq mRNA

997 NM\_009716). Cells were infected with MHV-A59 or mock-infected and harvested at 5 h p.i.

998 (libraries from replicate 2) or 8 h p.i. RPFs are plotted at the inferred position of the ribosomal

999 P site and coloured according to the phase of translation: pink for 0, blue for +1, yellow for +2.

1000 The main ORF (0 frame) is shown at the top in pink, with start and stop codons in all three

1001 frames marked by green and red bars (respectively) in the three panels below. The two yellow

1002 rectangles are in the +2 frame indicate the known *Atf4* uORFs (the first of which is only three

1003 codons in length). Dotted lines serve as markers for the start and end of the features in their

1004 matching colour. Note that read densities are plotted as reads per million host-mRNA-mapping

1005 reads, and that bar widths were increased to 12 nt to aid visibility, and therefore overlap, and  
1006 were plotted sequentially starting from the 5' end of the transcript. **(F)** Plot of  $\log_2$ (fold changes)  
1007 of translation efficiency (TE) vs transcript abundance for all genes included in both analyses.  
1008 Grey lines indicate fold changes of 2. Fold changes are plotted without filtering for significant  
1009 *p* values. Selected genes are marked: genes up-regulated predominantly by one of either  
1010 transcription or TE are marked in orange (upper middle and right middle sections), and *Chop*,  
1011 which is up-regulated at the level of both transcription and TE, is marked in green (top right  
1012 section).

1013  
1014 **Figure 2: MHV infection and activation of the unfolded protein response.** 17 Cl-1 cells  
1015 were incubated in the presence of tunicamycin (2  $\mu$ g/ml) or infected with MHV-A59 (MOI 5)  
1016 and harvested at 2.5, 5, 8 and 10 h p.i. **(A)** Cell lysates were separated by 12% SDS-PAGE and  
1017 immunoblotted using anti-ATF4, anti-p-eIF2 $\alpha$ , anti-eIF2 $\alpha$ , anti-PERK and anti-N antibodies  
1018 (green fluorescent secondary antibody). GAPDH was used as a loading control (red fluorescent  
1019 secondary antibody). Molecular masses (kDa) are indicated on the left and the p-eIF2 $\alpha$  band is  
1020 indicated by a white asterisk. **(B)** RT-qPCR of *Chop* and *Gadd34* mRNA for three biological  
1021 replicates of a timecourse of MHV infection or tunicamycin treatment. Data are normalised  
1022 using *Rpl19* as a housekeeping gene and presented as fold change of expression relative to  
1023 mock-infected cells (marked as a dashed line). **(C)** Mock-infected (left upper panel) and MHV-  
1024 infected (right upper panel) 17 Cl-1 cells were harvested at 5 h p.i. Cytoplasmic lysates were  
1025 resolved on 10–50% sucrose density gradients. Gradients were fractionated and fractions  
1026 monitored by absorbance ( $A_{254}$  nm). Twelve numbered fractions were collected and proteins  
1027 extracted, resolved by 12% SDS-PAGE and analysed by immunoblotting using the indicated  
1028 antibodies (anti-S6 as 40S marker, anti-RPL10 as 60S marker). Mock-infected (left lower  
1029 panel) and MHV-infected (right lower panel) 17 Cl-1 cells were harvested at 5 h p.i. in high-  
1030 salt lysis buffer (400 mM KCl) and analysed as described above. Molecular masses (kDa) are

1031 indicated on the left. Lane "Inp" contains whole cell lysate. **(D)** RT-PCR analysis of *Xbp1-u*  
1032 and *Xbp1-s* mRNAs. Total RNA (0.5µg) was subjected to RT-PCR analysis using primers  
1033 flanking the *Xbp1* splice site. PCR products were resolved in a 3% TBE-agarose gel and  
1034 visualised by ethidium bromide staining. *Rpl19* RT-PCR product was used as a loading control.  
1035 Molecular size markers (nt) are indicated on the left. **(E)** RT-qPCR of *Bip*, *calreticulin* and  
1036 *Grp94* mRNA for three biological replicates of a timecourse of MHV infection or tunicamycin  
1037 treatment. Data are normalised as in B. **(F)** Cell lysates were analysed by 12% SDS-PAGE and  
1038 immunoblotted using anti-BiP and anti-N antibodies. GAPDH was used as a loading control.  
1039

1040 **Figure 3: Effect of UPR inhibitors on MHV replication.** **(A)** MHV-infected cells (MOI 5)  
1041 were treated with UPR inhibitors (5 µM PERKi, 2 µM ISRIB, 60 µM IREi, or 100 µM  
1042 AEBSF). The inhibitors were added to the cells immediately after the virus adsorption period  
1043 and maintained in the medium until cells were harvested 8 h later. Plaque assays were  
1044 performed with serial dilutions of the supernatant containing released virions from 17 C1-1  
1045 cells infected with MHV-A59 in the presence or absence of the UPR inhibitors. Values show  
1046 the mean averages of the titration of three biological replicates. Error bars represent standard  
1047 errors. **(B-D)** MHV-infected cells (MOI 1 and MOI 5) were treated with dual combinations of  
1048 the UPR inhibitors. The inhibitors were added to the cells immediately after the virus  
1049 adsorption period and maintained in the medium until cells were harvested 8 h later. **(B)**  
1050 Released virions were quantified as described in A. **(C)** Cell lysates were separated by 12%  
1051 SDS-PAGE and immunoblotted using anti-N and anti-GAPDH antibodies as described in Fig  
1052 2A. **(D)** Representative images of mock- and MHV-infected cells at 8 h p.i. under no-drug or  
1053 IREi 60 µM/AEBSF 100µM treatment conditions. All *t*-tests were two-tailed and did not  
1054 assume equal variance for the two populations being compared (\**p* < 0.05, \*\* *p* < 0.01, \*\*\*

1055  $p < 0.001$ , \*\*\*\*  $p < 0.0001$ ). All  $p$ -values are from comparisons with the respective no-  
1056 treatment control at the same MOI.

1057

1058 **Figure 4: Mechanistic analysis of UPR activation by SARS-CoV-2 proteins.** HEK-293T

1059 cells were transfected with plasmids encoding SARS-CoV 2 S (S-HA) or ORF8 (ORF8-

1060 FLAG), mock-transfected, or treated with tunicamycin (Tn). At 8 h p.t., cells were treated with

1061 60  $\mu$ M IREi and 100  $\mu$ M AEBSF and then harvested at 24 and 36 h p.t. (A) Cells were harvested

1062 at 24 and 36 h p.t. and cell lysates were separated by 12% SDS-PAGE and immunoblotted

1063 using anti-FLAG, anti-HA, anti-HERP, anti-BiP, anti-PERK, anti-ATF4, anti-p-eIF2 $\alpha$ , anti-

1064 eIF2 $\alpha$  and anti-ATF6 as described in Fig 2A. The specific p-eIF2 $\alpha$  and ATF6-Nt bands are

1065 indicated with a white asterisk. (B) RT-PCR analysis of *XBPI-u* and *XBPI-s* mRNAs as

1066 described in Fig 2D. “h p.t.” = hours post-transfection.

1067

1068 **Figure 5: Induction of the UPR in SARS-CoV-2 infected cells and the effect of UPRi.** Vero

1069 CCL81 cells were incubated in the presence of tunicamycin (2  $\mu$ g/ml) or infected with SARS-

1070 CoV-2 (MOI 1) and treated with 60  $\mu$ M IREi and 100  $\mu$ M AEBSF. The inhibitors were added

1071 to the cells immediately after the virus adsorption period and maintained in the medium until

1072 cells were harvested 24 and 48 h later. (A) Cell lysates (upper) were immunoblotted using anti-

1073 S, anti-BiP, anti-HERP, anti-PERK, anti-ATF4, anti-p-eIF2 $\alpha$ , anti-eIF2 $\alpha$ , anti-ATF6 and anti-

1074 GAPDH antibodies as described in Fig 2A. RT-PCR analysis of *Xbp1-u* and *Xbp1-s* mRNAs

1075 (lower) as described in Fig 2D. The specific p-eIF2 $\alpha$  and ATF6-Nt bands are indicated with a

1076 white asterisk. (B) TCID<sub>50</sub> assays were performed with serial dilutions of the supernatant

1077 containing released virions from Caco2 cells infected with SARS-CoV-2 (MOI 0.01) for 48 h

1078 in the presence or absence of the indicated UPRi combinations. (C) Plaque assays were

1079 performed with serial dilutions of the supernatant containing released virions from Vero

1080 CCL81 or Calu3 cells infected with SARS-CoV-2 (MOI 1 and MOI 5) for 24 h in the presence

1081 or absence of 60  $\mu$ M IREi and 100  $\mu$ M AEBSF. Values show the mean averages of the titration  
1082 of three biological replicates. Error bars represent standard errors. All *t*-tests were two-tailed  
1083 and did not assume equal variance for the two populations being compared ( $*p < 0.05$ , \*\*  
1084  $p < 0.01$ ). Replicates with titres below the limit of detection (LoD) were excluded from *t*-tests,  
1085 precluding some conditions from statistical assessment.

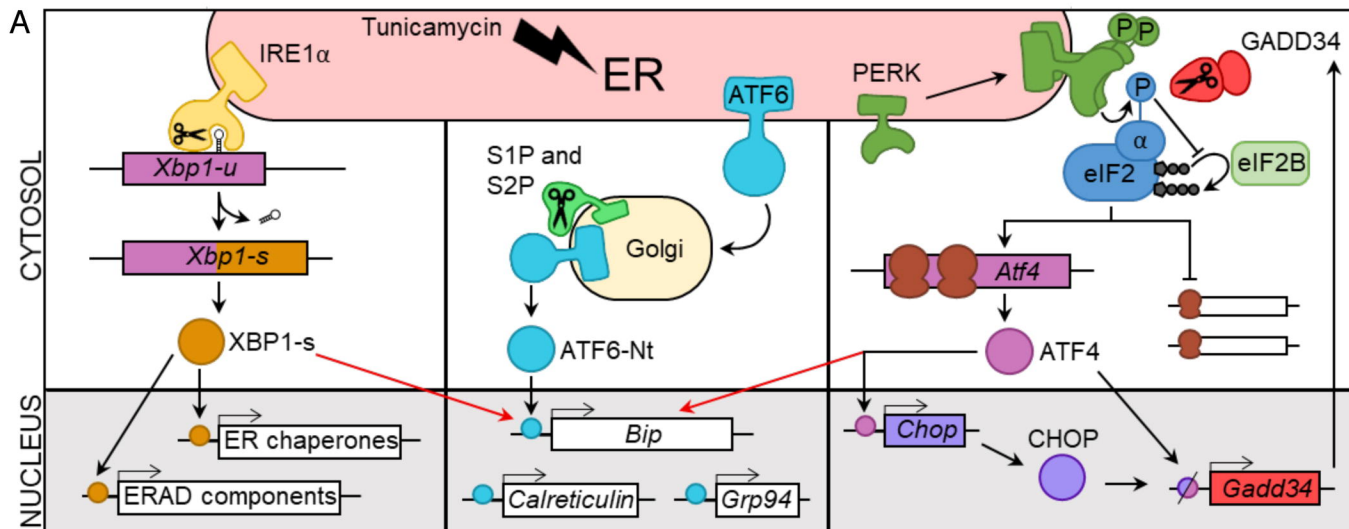

**B**

Pathways enriched in differentially transcribed gene lists

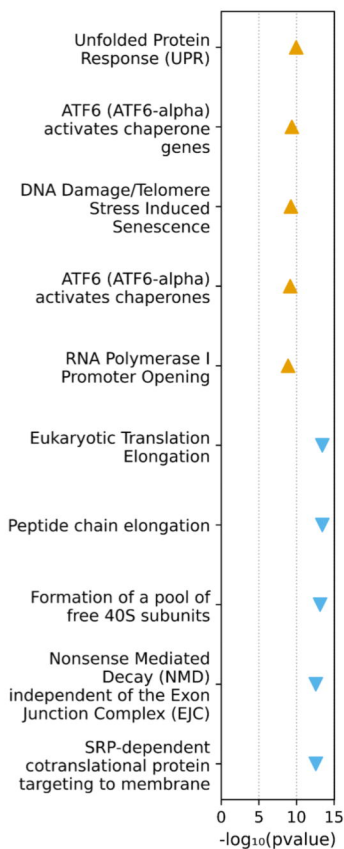

**C**

Differential transcription at 5 h p.i.

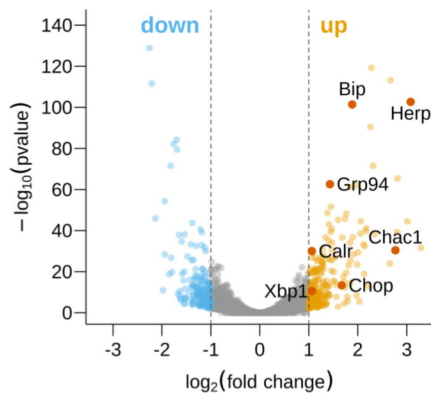

**D**

Differential translation efficiency at 5 h p.i.

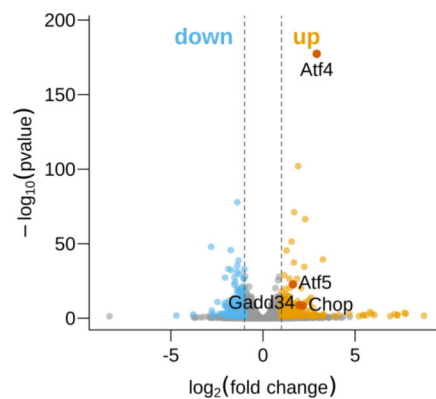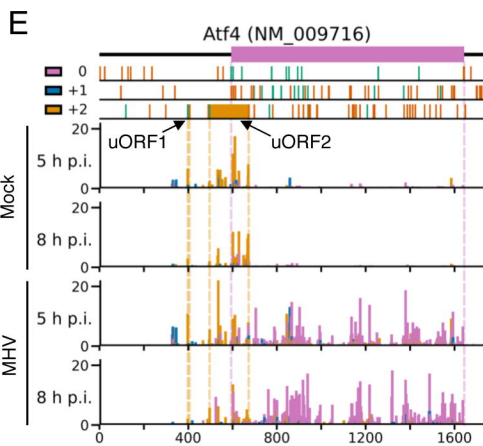

**F**

RNA compared to TE fold changes

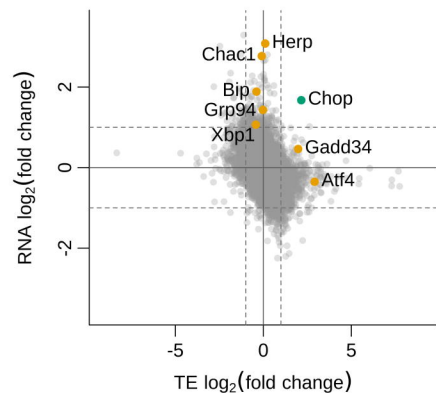



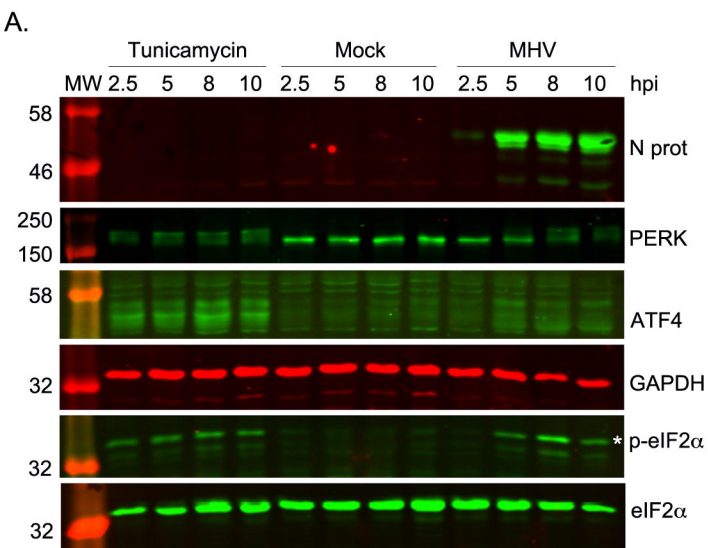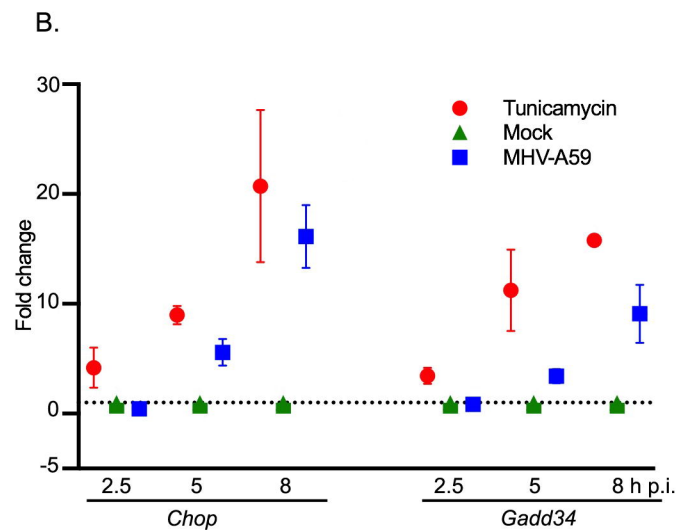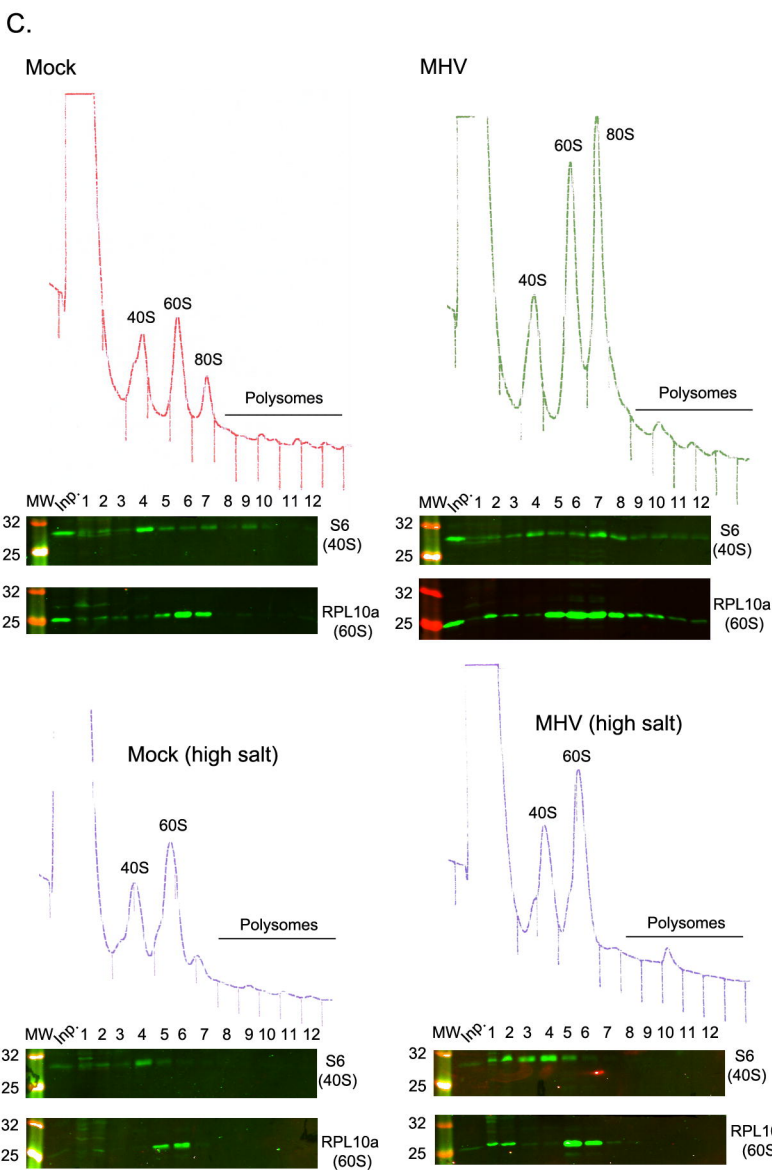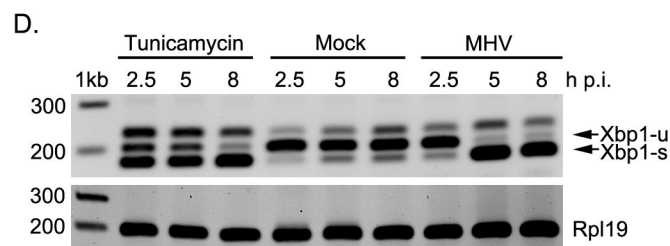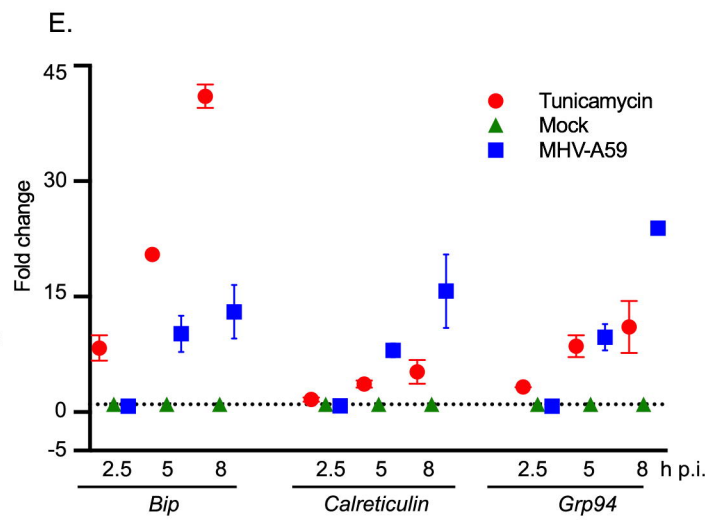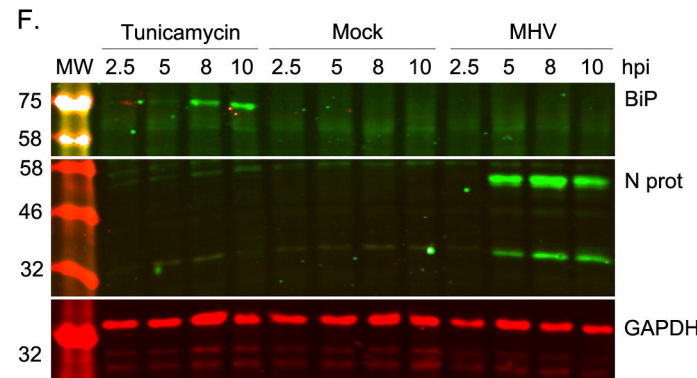



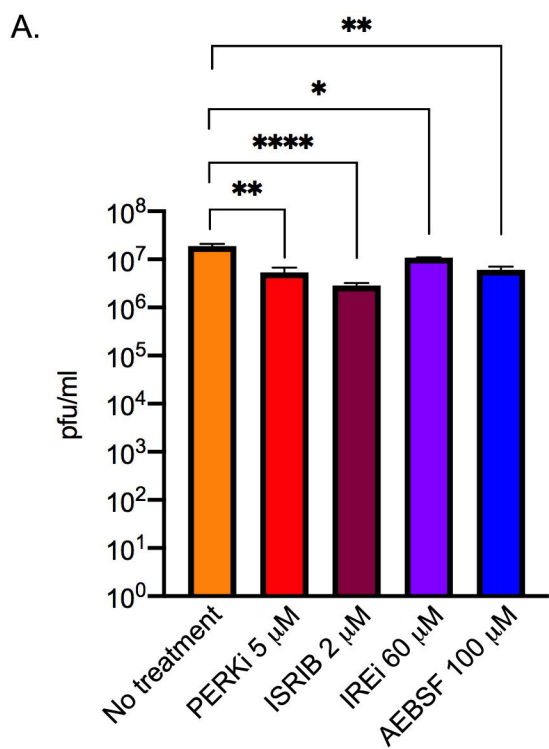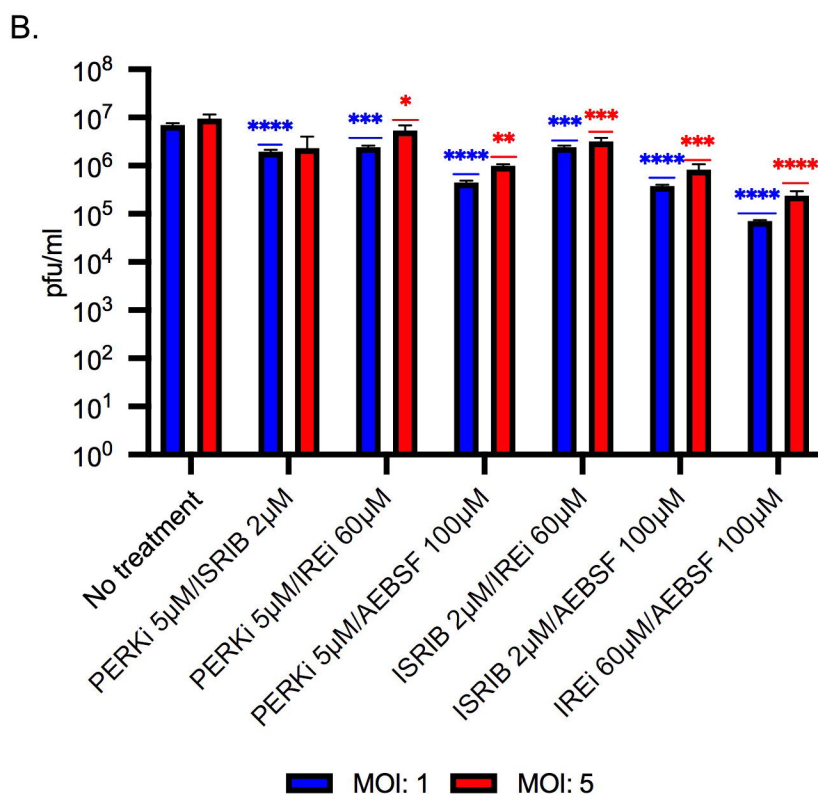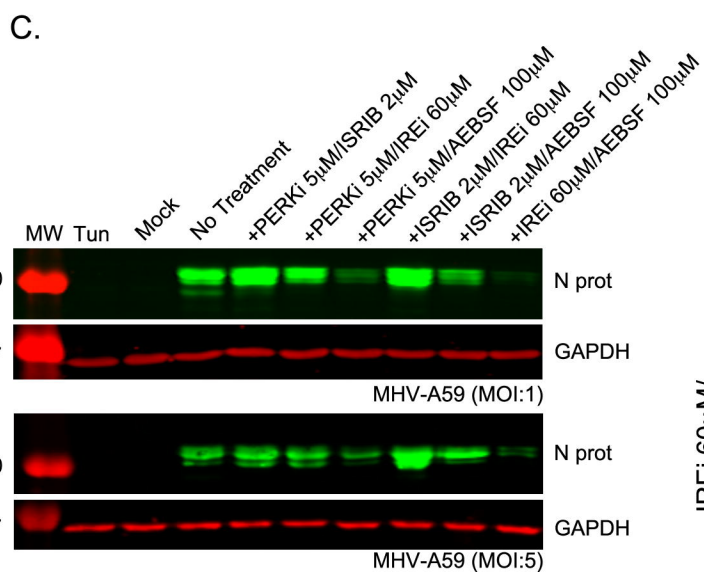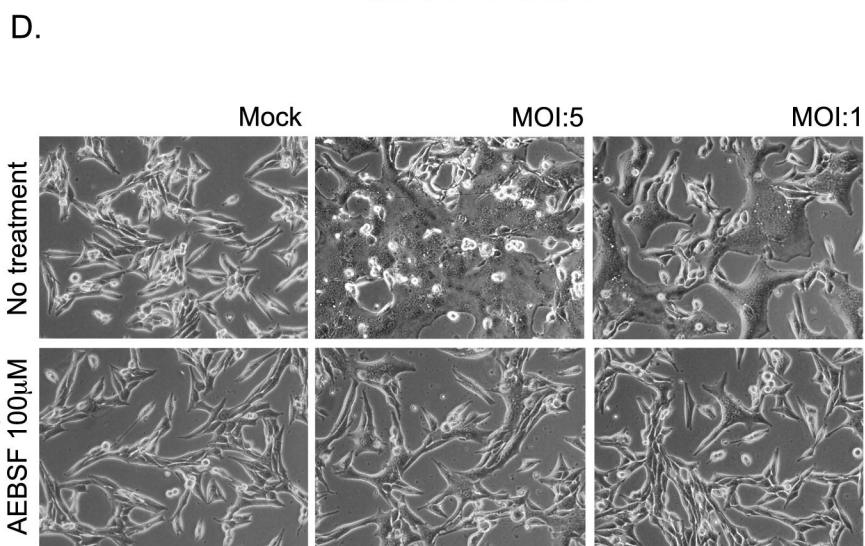

**A.**

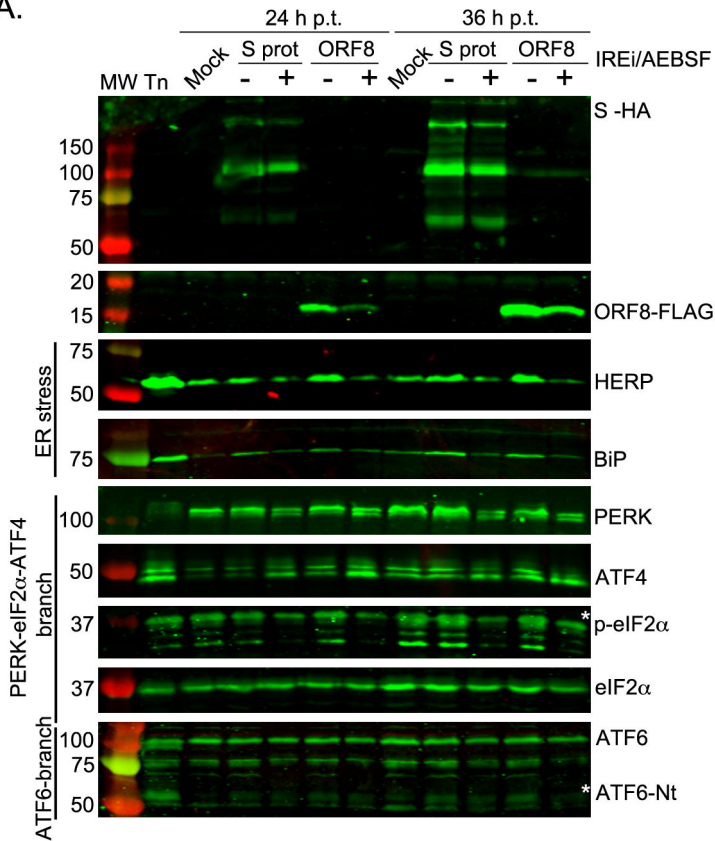

**B.**

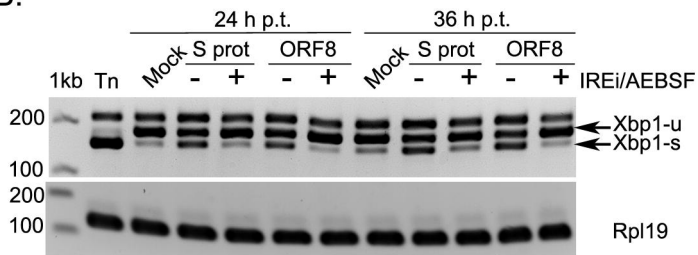

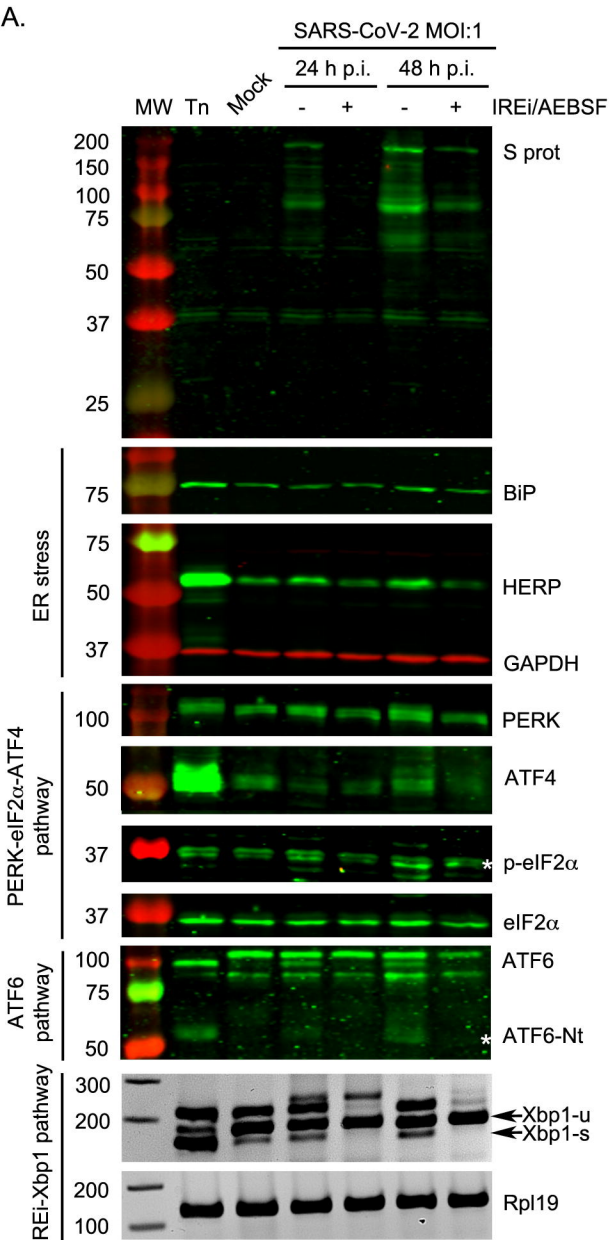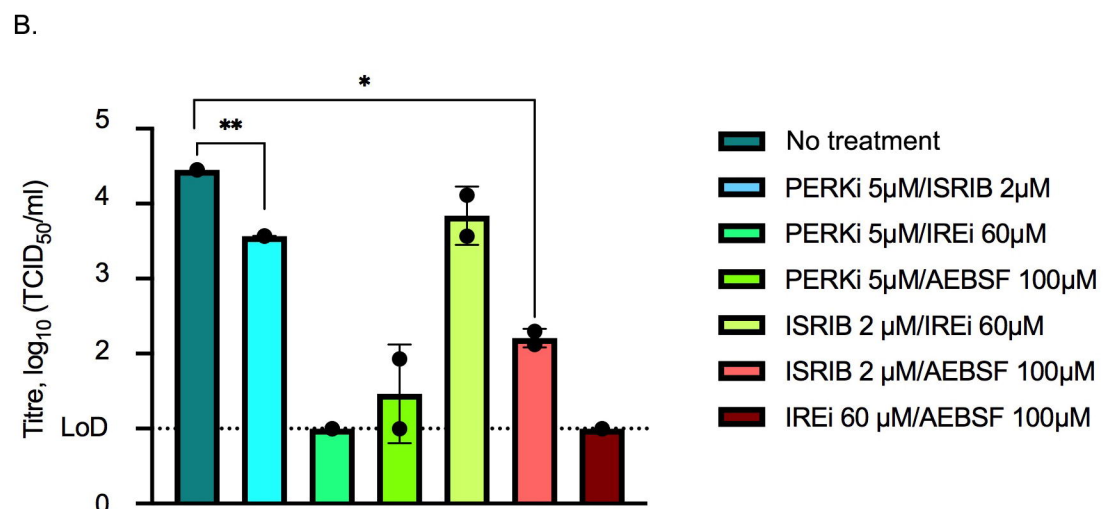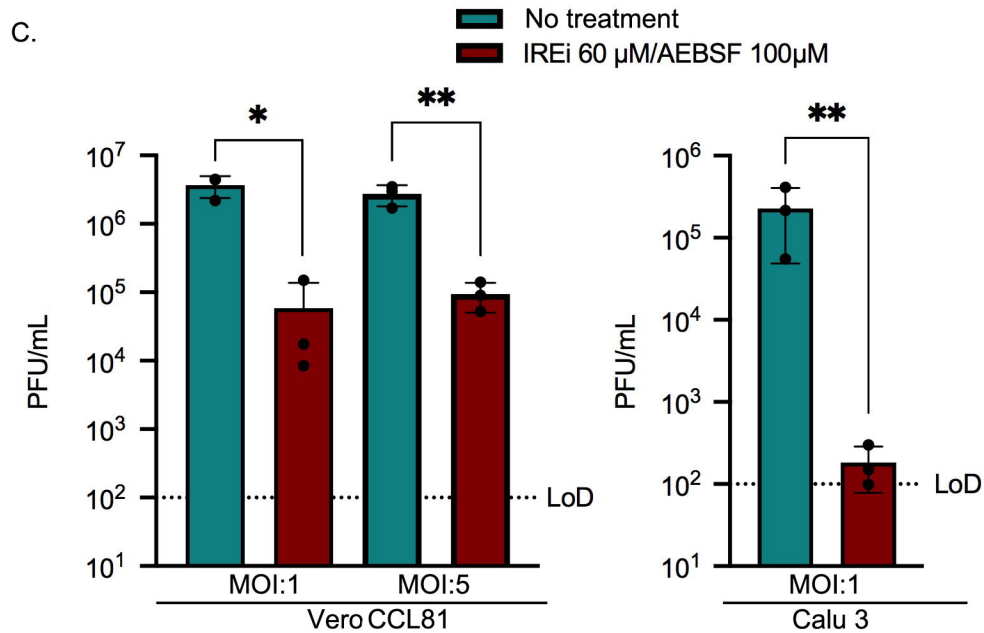

Source: https://www.biorxiv.org/content/biorxiv/early/2021/03/19/292979.full.pdf
